# Supplementary material for: Impact of gestational age on child intelligence, attention and executive function at age 5: a cohort study
Source: PubMed Central journal article supplement — BMJ Open. 2019 Sep 8;9(9):e028982. doi: 10.1136/bmjopen-2019-028982 (PMC6738700; doi:10.1136/bmjopen-2019-028982), 2019-09-08
Supplement: bmjopen-2019-028982.draft_revisions.pdf [file bmjopen-2019-028982.draft_revisions.pdf]

# BMJ Open

BMJ Open is committed to open peer review. As part of this commitment we make the peer review history of every article we publish publicly available.

When an article is published we post the peer reviewers' comments and the authors' responses online. We also post the versions of the paper that were used during peer review. These are the versions that the peer review comments apply to.

The versions of the paper that follow are the versions that were submitted during the peer review process. They are not the versions of record or the final published versions. They should not be cited or distributed as the published version of this manuscript.

BMJ Open is an open access journal and the full, final, typeset and author-corrected version of record of the manuscript is available on our site with no access controls, subscription charges or pay-per-view fees (<http://bmjopen.bmj.com>).

If you have any questions on BMJ Open's open peer review process please email [info.bmjopen@bmj.com](mailto:info.bmjopen@bmj.com)

# BMJ Open

## Impact of gestational age on child intelligence, attention, and executive function at age five: a cohort study

|                               |                                                                                                                                                                                                                                                                                                                                                                                                                                                  |
|-------------------------------|--------------------------------------------------------------------------------------------------------------------------------------------------------------------------------------------------------------------------------------------------------------------------------------------------------------------------------------------------------------------------------------------------------------------------------------------------|
| Journal:                      | <i>BMJ Open</i>                                                                                                                                                                                                                                                                                                                                                                                                                                  |
| Manuscript ID                 | bmjopen-2019-028982                                                                                                                                                                                                                                                                                                                                                                                                                              |
| Article Type:                 | Research                                                                                                                                                                                                                                                                                                                                                                                                                                         |
| Date Submitted by the Author: | 06-Jan-2019                                                                                                                                                                                                                                                                                                                                                                                                                                      |
| Complete List of Authors:     | Fogtmann, Emilie Pi; Herlev Hospital, Obstetrics and Gynaecology<br>Bruun, Frederik; Herlev Hospital, Obstetrics and Gynaecology<br>Slavensky, Julie Anna; Herlev Hospital, Obstetrics and Gynaecology<br>Mortensen, Erik; University of Copenhagen, Department of Public Health and Center for Healthy Ageing<br>Schjøler Kesmodel, Ulrik; Herlev Hospital, Obstetrics and Gynaecology; Kobenhavns Universitet, Department of Clinical Medicine |
| Keywords:                     | EPIDEMIOLOGY, Developmental neurology & neurodisability < PAEDIATRICS, OBSTETRICS                                                                                                                                                                                                                                                                                                                                                                |
|                               |                                                                                                                                                                                                                                                                                                                                                                                                                                                  |

SCHOLARONE™  
Manuscripts

1  
2  
3  
4 Impact of gestational age on child intelligence, attention, and executive  
5  
6  
7 function at age five: a cohort study  
8  
9

10  
11  
12 Emilie Pi Fogtmann<sup>a</sup>, MD, Frederik Jager Bruun<sup>a</sup>, Julie Anna Slavensky<sup>a</sup>, Erik Lykke Mortensen<sup>b</sup>,  
13  
14 MSc, Ulrik Schiøler Kesmodel<sup>a+c</sup>, MD, PhD  
15  
16

17  
18  
19  
20 <sup>a</sup>Department of Obstetrics and Gynaecology, Herlev University Hospital, Herlev Ringvej 75, 2730  
21  
22 Herlev, Denmark. <sup>b</sup>Unit of Medical Psychology, Department of Public Health and Center for  
23  
24 Healthy Ageing, University of Copenhagen, Øster Farimagsgade 5, 1014 Copenhagen K, Denmark.  
25

26  
27 <sup>c</sup>Department of Clinical Medicine, University of Copenhagen, Blegdamsvej 3B, 2200 Copenhagen  
28  
29 N, Denmark  
30  
31

32  
33  
34  
35 **Corresponding author**  
36

37  
38 Emilie Pi Fogtmann, Department of Obstetrics and Gynecology, Herlev Hospital, Herlev Ringvej  
39  
40 75, 2730 Herlev, Denmark, empifo@gmail.com  
41  
42

43  
44  
45  
46  
47 **Word count:** 3039  
48  
49  
50  
51  
52  
53  
54  
55  
56  
57  
58  
59  
60

## Abstract

**Objectives:** Preterm birth can affect cognition, but other factors including parental education and intelligence may also play a role, but few studies have adjusted for these potential confounders.

We aimed to assess the impact of gestational age (GA), late preterm birth (34-<37 weeks GA), and very to moderately preterm birth (<34 weeks GA) on intelligence, attention, and executive function in a population of 5-year-old Danish children.

**Design:** Follow-up study.

**Setting:** Denmark 2003-2008.

**Participants:** A cohort of 1776 children sampled from the Danish National Birth Cohort with information on GA, family and background factors, and completed neuropsychological assessment at age five.

**Primary outcome measures:** Wechsler Preschool and Primary Scale of Intelligence-Revised, Test of Everyday Attention for Children at Five, and Behaviour Rating Inventory of Executive Function scores.

**Results:** For preterm birth <34 weeks GA ( $n=8$ ), the mean difference in full-scale intelligence quotient was -10.6 points [95% confidence interval; -19.4 to -1.8] when compared to the term group ( $\geq 37$  weeks GA), and adjusted for potential confounders. For the teacher-assessed Global Executive Composite, the mean difference was 5.3 points [2.4 to 8.3] in the adjusted analysis, indicating more executive function difficulties in the preterm group <34 weeks GA compared to the term group. Only part of the effect was mediated through low birthweight. Maternal intelligence and parental education proved to be weak confounders.

1  
2  
3  
4 No associations between late preterm birth 34-<37 weeks GA ( $n=40$ ) and poor cognition were  
5  
6 shown.  
7  
8

9  
10 **Conclusions:** This study showed significantly lower intelligence and poorer executive function in  
11  
12 children born <34 weeks GA compared to children born at term. GA has a crucial role in  
13  
14 determining cognitive abilities independent of birthweight, maternal intelligence, and parental  
15  
16 education. Studies with larger sample sizes are needed to confirm these findings.  
17  
18  
19  
20  
21  
22  
23  
24  
25  
26  
27  
28  
29  
30  
31  
32  
33  
34  
35  
36  
37  
38  
39  
40  
41  
42  
43  
44  
45  
46  
47  
48  
49  
50  
51  
52  
53  
54  
55  
56  
57  
58  
59  
60

## Article summary

### Strengths and limitations of this study

- In this study population, thorough information on family and background factors that may influence the cognitive outcome of a child was obtained.
- Directed acyclic graphs were composed to identify potential confounders prior to data analysis, and it was possible to adjust for an exhaustive set of confounders.
- The study population was sampled based on average alcohol consumption and binge drinking during pregnancy and may not be representative for the entire population, however, sample weights were applied in analyses to accommodate this.
- Robust standard errors were used to account for the sample design and shortcomings in the data.
- The proportion of children born preterm in this study population was small.

### Keywords

Attention, child development, executive function, gestational age, intelligence, preterm birth.

### Abbreviations

GA: gestational age

LDPS: Lifestyle During Pregnancy Study

DNBC: Danish National Birth Cohort

MBR: Danish Medical Birth Registry

1  
2  
3  
4 IQ: intelligence quotient  
5

6 WPPSI-R: Wechsler Preschool and Primary Scales of Intelligence-Revised  
7

8  
9 VIQ: verbal intelligence quotient  
10

11 PIQ: performance intelligence quotient  
12

13 FIQ: full-scale intelligence quotient  
14

15 TEACH-5: Test of Everyday Attention for Children at Five  
16

17 SD: standard deviation  
18

19 BRIEF: Behaviour Rating Inventory of Executive Function  
20

21 GEC: Global Executive Composite  
22

23 BRI: Behavioural Regulation Index  
24

25 MI: Metacognition Index  
26

27 DAG: directed acyclic graph  
28

29 CI: confidence interval  
30  
31  
32  
33  
34  
35  
36  
37  
38  
39  
40  
41  
42  
43  
44  
45  
46  
47  
48  
49  
50  
51  
52  
53  
54  
55  
56  
57  
58  
59  
60

## INTRODUCTION

In the past decades there has been an increase in the number of children being born preterm.<sup>1</sup>

Advances in treatment have led to lower mortality rates, but morbidity rates have not been reduced to the same degree.<sup>2</sup> Many organs are vulnerable to preterm birth, and the preterm brain in particular can suffer long-term neurological impairments.<sup>3</sup> A dose-response relationship has been proposed, suggesting that the lower the gestational age (GA), the higher the risk of cognitive impairment.<sup>4</sup>

A study showed that at age five 10% of preterm infants received care in centres specialised for children with disabilities.<sup>5</sup> Hence, it is important to determine the association between preterm birth and cognitive outcomes in order to advise women at risk of preterm delivery and to give informed predictions about the future. Also, the knowledge can be of value to the obstetrician and paediatrician when making decisions about time and mode of delivery and on whether or not resuscitation should be offered at a GA as low as 22-24 weeks.

Previous studies have shown associations between preterm birth and low intelligence, attention deficits, and impaired executive function.<sup>4,6</sup> These negative outcomes may in part be a consequence of low GA, but other biological and social factors including parental education and intelligence may also affect the cognitive outcome of a child. In our dataset, parental education and maternal intelligence quotient (IQ) have proven to be strong predictors of child IQ,<sup>7</sup> and a recent study has shown that maternal IQ predicts IQ in very preterm children at age five.<sup>8</sup> Thus, it is important to adjust for these potential confounders when investigating an association between preterm birth and cognitive outcomes. Previous studies have adjusted for parental education,<sup>9,10</sup> but to our knowledge, only one study<sup>11</sup> has adjusted for maternal intelligence. In that study children born before 34 weeks GA were excluded, and the sample size was small ( $n=336$ ).



1  
2  
3  
4 The aim of our study was to investigate the influence of GA, late preterm birth (34-<37 weeks GA),  
5  
6 and very to moderately preterm birth (<34 weeks GA) on intelligence, attention, and executive  
7  
8 function in a population of 5-year-old Danish children adjusted for relevant socioeconomic  
9  
10 confounders including parental educational level and maternal intelligence.  
11  
12  
13  
14  
15  
16

## 17 **MATERIAL AND METHODS**

### 18 **Study sample**

19  
20  
21 We used data from the Lifestyle During Pregnancy Study (LDPS),<sup>12</sup> which is a sample from the  
22  
23 Danish National Birth Cohort (DNBC). The DNBC contains information on 101 042 Danish  
24  
25 women and their children recruited from 1997 to 2003. Of the invited women, 60% chose to  
26  
27 participate, and 30% of all pregnant women at that time were included.  
28  
29  
30  
31

32  
33 A total of 3478 women with singleton pregnancies were sampled from the DNBC and invited to  
34  
35 participate in the LDPS from 2003 to 2008, with oversampling of women reporting a relatively high  
36  
37 alcohol intake or binge drinking episodes during pregnancy.<sup>12 13</sup> Out of these, 1776 had  
38  
39 neuropsychological tests performed and had information on GA available, and thus were included  
40  
41 in our analyses. There were no considerable differences between the participants and non-  
42  
43 participants.<sup>13</sup> Exclusion criteria were multiple pregnancies, congenital diseases with a large risk of  
44  
45 mental retardation (the diagnostic term used at the time of data collection), inability to speak  
46  
47 Danish, and impaired vision or hearing abilities preventing the child from completing the tests.<sup>12</sup>  
48  
49  
50  
51

### 52 **Data collection**

53  
54  
55  
56 Exposure variables  
57  
58  
59  
60

1  
2  
3  
4 Information on GA was obtained from the Danish Medical Birth Registry (MBR). We used GA as a  
5  
6 continuous and categorical variable, comparing *late preterm* birth (34 -<37 completed weeks of  
7  
8 gestation) and *very to moderately preterm* birth (GA<34 weeks) with birth at *term* (GA ≥37 weeks),  
9  
10 respectively.  
11  
12

### 13 14 Outcome measures

15  
16  
17 At child age five (age span: 60-64 months chronological age), a neuropsychological test battery was  
18  
19 administered by specially trained psychologists.  
20  
21

### 22 23 *Intelligence*

24  
25  
26 The child's IQ was assessed using the Wechsler Preschool and Primary Scales of Intelligence-  
27  
28 Revised (WPPSI-R).<sup>14</sup> WPPSI-R includes five verbal and five performance subtests that are used to  
29  
30 calculate an overall verbal IQ (VIQ), overall performance IQ (PIQ), and full-scale IQ (FIQ). In this  
31  
32 test battery, only three of the verbal (arithmetic, information, and vocabulary) and three of the  
33  
34 performance (block design, geometric design, and object assembly) subtests were carried out to  
35  
36 ensure the child's cooperation throughout the testing. Standard procedures were used to prorated  
37  
38 scores from the shortened test. Swedish norms were applied to derive the IQ scores, since no  
39  
40 Danish norms exist. This should not affect any comparisons made internally within the sample with  
41  
42 respect to GA differences.  
43  
44  
45

### 46 47 *Attention*

48  
49  
50 Attention measures were assessed with the Test of Everyday Attention for Children at Five  
51  
52 (TEACh-5).<sup>15</sup> For this study, two subtests assessing selective attention ('Great Balloon Hunt' and  
53  
54 'Hide and Seek II') and two subtests assessing sustained attention ('Barking' and 'Draw a line')  
55  
56 were used. Each subtest score was standardised to a mean of 0 and a standard deviation (SD) of 1.  
57  
58  
59  
60

1  
2  
3  
4 To calculate composite scores for overall, selective, and sustained attention, the means of the  
5  
6 respective standardised subtest scores for each individual were calculated and re-standardised to a  
7  
8 mean of 0 and SD of 1.  
9

### 10 11 12 *Executive function*

13  
14  
15 Executive function was assessed using the Behaviour Rating Inventory of Executive Function  
16  
17 (BRIEF) questionnaire.<sup>16</sup> The questionnaire consists of two versions, one for parents and one for  
18  
19 teachers. Each questionnaire evaluates eight domains of executive functioning and form the Global  
20  
21 Executive Composite (GEC). Three of the eight domains form the Behavioural Regulation Index  
22  
23 (BRI), and five of the domains form the Metacognition Index (MI). Since the eight domains do not  
24  
25 follow a normal distribution, we performed a normalising t-score transformation to standardise each  
26  
27 domain to a mean of 50 and SD of 10. To compute the GEC, BRI, and MI, the means of the  
28  
29 respective domains for each individual were calculated and re-standardised to a mean of 50 and SD  
30  
31 of 10. For all BRIEF scores, a higher score indicates more executive function difficulties.  
32  
33  
34

### 35 36 37 *Covariates*

38  
39  
40 To identify relevant covariates, we constructed directed acyclic graphs (DAGs)<sup>17</sup> using the  
41  
42 graphical tool DAGitty.  
43

44  
45 Important covariates were obtained from prenatal and postnatal telephone interviews, a parent-  
46  
47 administered questionnaire at follow-up, the Danish social security number, and the MBR. In  
48  
49 addition, the mother's intelligence was assessed at follow-up with Raven's Standard Progressive  
50  
51 Matrices<sup>18</sup> and two subtests (vocabulary and information) of the Wechsler Adult Intelligence  
52  
53 Scale.<sup>19</sup> The three test results were weighted equally and combined to derive an IQ score.  
54  
55  
56  
57  
58  
59  
60

1  
2  
3  
4 Prior to analysis, we evaluated the five lowest and five highest observations for all outcomes and  
5  
6 covariates to detect unrealistic values ( $\pm 4$  SD for the normally distributed data). This resulted in  
7  
8 removal of three birthweight observations that exceeded our threshold when evaluated according to  
9  
10 Danish standards.<sup>20</sup> Moreover, we removed one unrealistic body mass index of 13.9 kg/m<sup>2</sup> and one  
11  
12 observation of average alcohol intake of 36 drinks/week during pregnancy.  
13  
14  
15

## 16 **Statistical analyses**

17  
18  
19 We performed multiple linear regression analyses using SAS, Version 9.4 (© SAS Institute Inc.,  
20  
21 Cary, NC, USA).  
22  
23

24 We assessed term vs. late preterm birth and term vs. very or moderately preterm birth.  
25  
26

27 We adjusted for a set of a priori defined variables based on a DAG (see supplementary figure 1).  
28  
29

30 This included maternal age (continuous), maternal IQ (continuous), average alcohol consumption in  
31  
32 pregnancy (0, 1-4, 5+ drinks per week), smoking in pregnancy (yes/no), parity (0, 1, 2+), maternal  
33  
34 marital status (single/cohabitating), parental educational level (continuous), and child sex  
35  
36 (male/female). Moreover, we adjusted for the psychologist administering the tests (8 categories)  
37  
38 and age at testing (continuous).  
39  
40  
41

42 In the study sample, maternal IQ and parental educational level (total duration in years averaged for  
43  
44 both parents, if information on the father was missing, maternal only) are important predictors of  
45  
46 child intelligence,<sup>7</sup> and in order to evaluate the importance of adjusting for these factors, sensitivity  
47  
48 analyses were conducted removing these two factors separately and simultaneously from the  
49  
50 regression models. Moreover, to investigate how much of the effect that could be attributed to  
51  
52 birthweight, we inserted this potential intermediate factor in a regression model.  
53  
54  
55  
56  
57  
58  
59  
60

1  
2  
3  
4 Since the women in our population were sampled based on alcohol intake during pregnancy,<sup>21</sup> we  
5 used sample weights in our analyses to account for the oversampling of women with relatively high  
6 alcohol intake or binge drinking episodes.<sup>12 13</sup> To account for the complex stratified sampling  
7 design and possible deviations from normality and variance homogeneity, we applied robust  
8 standard errors. All statistical tests were two-sided and with a significance level at 0.05.

9  
10  
11 We performed complete case analyses, as multiple imputation strategies to handle missing data in  
12 this cohort have produced essentially the same results when compared to complete case analyses.<sup>21</sup>

13  
14  
15 Complete information on child IQ scores was available for 99.3% of the sample, for attention scores  
16 84.7%, and for executive function, 99.8% of the parents and 86.6% of the teachers had completed  
17 the questionnaire. All covariates were available for 98.6% of the sample. No significant differences  
18 between the term and the two preterm groups were evident with regard to the proportion of missing  
19 outcome and covariate data.

## 20 21 22 23 24 25 26 27 28 29 30 31 32 33 **Ethical approval**

34  
35  
36 The data collection for the LDPS was approved by the DNBC Board of Directors, the DNBC  
37 Steering committee, the regional Ethics Committee, the Danish Data Protection Agency, and the  
38 Institutional Review Board at the Centers for Disease Control and Prevention. Signed informed  
39 consent was obtained for the LDPS. The current study was further approved by the Danish Data  
40 Protection Agency (file number 2012-58-0004).

## 41 42 43 44 45 46 47 48 49 50 51 52 **RESULTS**

53  
54  
55 The characteristics of the 1776 mother and child pairs are presented in table 1. There were no  
56 significant group differences with respect to health, lifestyle, and socioeconomic characteristics.

1  
2  
3  
4 Although not statistically significant, the mothers of the children born very or moderately preterm  
5 were more likely to be younger, first-time mothers, without a partner, having smoked during  
6 pregnancy, but they also had slightly higher IQ and longer education. The mothers of the late  
7 preterm children were less likely to have consumed alcohol in pregnancy, but more likely to have  
8 male births and lower IQ when compared to the other groups.  
9  
10  
11  
12  
13  
14  
15

16 With children born at term as the reference, the mean difference in FIQ, VIQ, and PIQ for the very  
17 or moderately preterm group was -10.6 points [95% CI; -19.4 to -1.8], -7.4 points [-13.4 to -1.5],  
18 and -11.7 points [-21.9 to -1.5], respectively, when adjusting for potential confounders. Among the  
19 late preterm children, a tendency towards lower IQs was evident, but this trend diminished when  
20 adjusting for potential confounders.  
21  
22  
23  
24  
25  
26  
27

28 For the attention measures, the mean differences were small, and none of the adjusted analyses  
29 reached statistical significance.  
30  
31  
32

33 With regard to executive function, no significant findings were evident in the parents' assessment.  
34 However, analyses of the teachers' assessment showed a mean difference in GEC, BRI, and MI in  
35 the very or moderately preterm group of 5.3 points [95% CI; 2.4 to 8.3], 4.2 points [-0.6 to 9.0], and  
36 5.5 points [2.0 to 9.0], respectively, when compared to the term group and adjusting for potential  
37 confounders. For the late preterm group, the results were similar but did not reach statistical  
38 significance (see table 2).  
39  
40  
41  
42  
43  
44  
45

46 Analyses with GA as a continuous variable did not alter the conclusions above (see table 3).  
47  
48  
49

50 When maternal IQ and parental education were removed from the regression analyses separately or  
51 simultaneously (data not shown), the estimates of association did not change notably. However,  
52 when these variables were removed simultaneously from the regression, most estimates became  
53 insignificant due to wider CIs.  
54  
55  
56  
57

58 When introducing birthweight in the regression analyses (data not shown), the association between  
59  
60

GA and all IQ outcomes became considerably weaker and were no longer significant. However, a trend towards lower IQ in the very or moderately preterm group was still evident, as the mean differences in FIQ, VIQ, and PIQ were reduced to -7.0 points [95% CI; -15.7 to 1.6], -5.9 points [-12.2 to 0.3], and -6.8 points [-16.6 to 3.0], respectively, when compared to the term group. When birthweight was introduced in the analyses of attention and executive function outcomes, the results did not change substantially.

## DISCUSSION

### Main findings

We found a statistically significant effect of very or moderately preterm birth on IQ and teacher-assessed executive function, even when adjusting for potential confounders. Although maternal IQ and parental education accounted for much of the variance in child IQ in this dataset,<sup>7</sup> these two factors should only be considered weak confounders with no significant association with GA.

The inclusion of birthweight in the regression analyses for IQ outcomes attenuated the associations for the very or moderately preterm group, suggesting that the association between low GA and low IQ in this group is, in part, mediated through low birthweight. For the late preterm group, the associations completely vanished when including birthweight in the regression, suggesting that the effect of low GA in this group is predominantly explained by low birthweight. This underlines the importance of looking at GA relatively to birthweight when investigating effects of preterm birth, though our results for the very to moderately preterm children indicate that there may be cognitive effects of GA which are independent of birthweight, perhaps reflecting effects of very low GA on brain development.

## Strengths and limitations

One of the strengths of this study is the relatively large sample size with thorough information on family and background factors that may influence the cognitive outcome of a child. Specially trained psychologists, unaware of the gestational age, conducted neuropsychological tests with a high interrater reliability of 97-97.5 %.<sup>12</sup> To minimise bias in our analyses, we composed DAGs to identify potential confounders prior to data analysis. Due to our large sample size, we were able to adjust for an exhaustive set of confounders. Other strengths of our study were a predefined protocolled methodology, and use of robust standard errors to account for the sample design and shortcomings in the data.

Our study has some limitations. The study population was sampled based on average alcohol consumption and binge drinking during pregnancy,<sup>12 13</sup> and therefore, the sample is not representative of the entire DNBC population. We applied sample weights in the analyses to accommodate this. However, the use of weights may be problematic for small subgroups, and together with the use of robust standard errors, this approach may have reduced the power to obtain statistically significant results and widened the CIs.

Another weakness of this study is the relatively small proportion of children born preterm, especially children born very preterm (<32 weeks GA). According to MBR records from 2000 (our recruitment period was from 1997 to 2003), we would expect 6.3% of all new-borns to be born preterm.<sup>22</sup> In our population it was only 2.7%, which is equal to an underrepresentation of 57%.

Only 0.2% of our sample was born very preterm, although we would expect 1.0%.<sup>22</sup> This can be a result of various factors that prevent parents with children born preterm from participating in a clinical study, in particular if the children are born very preterm and need special care.

However, studies have shown that the influence of selection bias on several exposure-outcome associations in the DNBC is limited.<sup>23</sup> We adjusted for a large number of covariates associated with



1  
2  
3  
4 selection, still we cannot rule out that the low prevalence of preterm births in our cohort may have  
5  
6 limited our power to detect any true differences as significant. Moreover, the low prevalence of  
7  
8 preterm births prevented us from performing analyses investigating the impact of very or extremely  
9  
10 preterm birth.  
11  
12

### 13 14 **Interpretation**

15  
16  
17 For the IQ outcomes, the findings in our study are generally in line with previous findings with an  
18  
19 IQ reduction of approximately 10 points in children born preterm.<sup>4,24</sup> However, in our study, this  
20  
21 clinically very relevant difference was only seen among the very or moderately preterm children,  
22  
23 and not in the late preterm group. A meta-analysis by Chan et al.<sup>25</sup> showed a statistically significant  
24  
25 impact of late preterm birth on general cognitive ability and non-verbal intelligence. Our study in  
26  
27 part contradicts these findings, as no associations between late preterm birth and IQ (full-scale,  
28  
29 verbal, and non-verbal) were found. In our unadjusted analyses, we saw a trend towards lower IQ  
30  
31 among late preterm children, but the trend disappeared when adjusting for confounders. This  
32  
33 discrepancy may reflect insufficient adjustments in other studies but also the limited power of our  
34  
35 study.  
36  
37  
38  
39

40  
41 When assessing attention measures, we only found one borderline statistically significant result.  
42  
43 This is not in line with previous findings suggesting that preterm infants are at increased risk of  
44  
45 developing eg Attention Deficit Hyperactivity Disorder with a relative risk of 2.64 [95% CI 1.85,  
46  
47 3.78].<sup>24</sup> However, TEACH-5 has not been validated as a diagnostic test, and given the unambiguous  
48  
49 findings in the present study, it is possible that GA does not have an impact on test of basic  
50  
51 attention function.  
52  
53

54  
55 In the field of executive function, it has been suggested that extremely preterm infants (<28 weeks  
56  
57 GA) are at increased risk of developing executive function difficulties.<sup>26</sup> Studies investigating the  
58  
59  
60

1  
2  
3  
4 association between very, moderately, or late preterm birth and poor BRIEF scores have not  
5 detected any convincing deficits when evaluating the parents' questionnaire,<sup>27 28</sup> and to our  
6 knowledge, the teachers' questionnaire has not previously been used for this purpose. Hodel et al.  
7 detected deficits in a population of moderately to late preterm infants at the age of 9 months and at  
8 4 years,<sup>29</sup> but in these studies, other executive function measures than BRIEF were applied.

9  
10  
11  
12  
13  
14  
15 In extremely low birthweight children, teachers have proven to report significantly more difficulties  
16 on the BRI subscale compared to the parents.<sup>30</sup> In our study, we found that teachers reported more  
17 difficulties in all areas (GEC, BRI, and MI) when compared to the parents. This can be due to  
18 teachers having a more objective viewpoint and being more experienced in working with children  
19 with and without difficulties.  
20  
21  
22  
23  
24  
25  
26  
27  
28  
29  
30

## 31 CONCLUSION

32  
33  
34 This study showed significantly lower IQ and poorer executive function in children born very or  
35 moderately preterm (<34 weeks GA) compared to children born at term ( $\geq 37$  weeks GA), but only  
36 the differences in IQ were considered clinically relevant. Part of the effect was mediated through  
37 low birthweight. No associations between late preterm birth (34-<37 weeks GA) and poor cognitive  
38 outcomes were shown.  
39  
40  
41  
42  
43  
44  
45

46 Maternal IQ and parental education are strong predictors of child IQ in our dataset but were only  
47 weak confounders of the association between GA and cognitive outcomes. Therefore, GA has a  
48 crucial role in determining cognitive abilities independent of birthweight, maternal IQ, and parental  
49 educational level. Further studies with larger sample sizes to confirm these findings are needed.  
50  
51  
52  
53  
54  
55  
56  
57  
58  
59  
60

1  
2  
3  
4  
5  
6  
7  
8  
9  
10  
11  
12  
13  
14  
15  
16  
17  
18  
19  
20  
21  
22  
23  
24  
25  
26  
27  
28  
29  
30  
31  
32  
33  
34  
35  
36  
37  
38  
39  
40  
41  
42  
43  
44  
45  
46  
47  
48  
49  
50  
51  
52  
53  
54  
55  
56  
57  
58  
59  
60

## Acknowledgements

The authors would like to thank the participants for their participation in the study.

## Contributors

Dr. Fogtmann contributed to the conception and design of the study, performed data management and statistical analyses, analysed and interpreted the data, drafted the initial manuscript, and wrote the final manuscript with contributions from the co-authors.

Miss Slavensky and Mr. Jager Bruun contributed to the conception and design of the study, assisted with statistical analyses and interpretation of the data, and critically reviewed and revised the manuscript.

Mr. Mortensen and Dr. Kesmodel conceptualised and designed the study, analysed and interpreted the data, and critically reviewed and revised the manuscript.

All authors approved the final manuscript as submitted and agree to be accountable for all aspects of the work.

## Funding

This work was supported by a scholarship granted by the Novo Nordisk Foundation. The LDPS was supported primarily by Centers for Disease Control and Prevention, Atlanta, Georgia, USA, and also from the Danish National Board of Health, the Lundbeck Foundation, Ludvig & Sara Elsass' Foundation, the Augustinus Foundation, and Aase & Ejnar Danielsen's Foundation. The Danish National Research Foundation established the Danish Epidemiology Science Center that initiated and created the DNBC. Besides a major grant from this Foundation, additional support for the

1  
2  
3  
4 DNBC was obtained from the Pharmacy Foundation, the Egmont Foundation, the March of Dimes  
5  
6 Birth Defects Foundation, the Augustinus Foundation, and the Health Foundation.  
7  
8  
9  
10  
11

### 12 **Competing interests**

13  
14  
15  
16 None declared.  
17  
18  
19  
20  
21

### 22 **Data sharing statement**

23  
24  
25 No additional data are available for this study.  
26  
27  
28  
29  
30  
31  
32  
33  
34  
35  
36  
37  
38  
39  
40  
41  
42  
43  
44  
45  
46  
47  
48  
49  
50  
51  
52  
53  
54  
55  
56  
57  
58  
59  
60

## References

1. Langhoff-Roos J, Kesmodel U, Jacobsson B, et al. Spontaneous preterm delivery in primiparous women at low risk in Denmark: population based study. *BMJ* 2006;332(7547):937-9. doi: 10.1136/bmj.38751.524132.2F
2. Wilson-Costello D, Friedman H, Minich N, et al. Improved survival rates with increased neurodevelopmental disability for extremely low birth weight infants in the 1990s. *Pediatrics* 2005;115(4):997-1003. doi: 10.1542/peds.2004-0221
3. Saigal S, Doyle LW. An overview of mortality and sequelae of preterm birth from infancy to adulthood. *Lancet* 2008;371(9608):261-9. doi: 10.1016/S0140-6736(08)60136-1
4. Kerr-Wilson CO, Mackay DF, Smith GC, et al. Meta-analysis of the association between preterm delivery and intelligence. *J Public Health (Oxf)* 2012;34(2):209-16. doi: 10.1093/pubmed/fdr024
5. Larroque B, Ancel PY, Marret S, et al. Neurodevelopmental disabilities and special care of 5-year-old children born before 33 weeks of gestation (the EIPAGE study): a longitudinal cohort study. *Lancet* 2008;371(9615):813-20. doi: 10.1016/S0140-6736(08)60380-3
6. Aarnoudse-Moens CS, Weisglas-Kuperus N, van Goudoever JB, et al. Meta-analysis of neurobehavioral outcomes in very preterm and/or very low birth weight children. *Pediatrics* 2009;124(2):717-28. doi: 10.1542/peds.2008-2816
7. Eriksen HL, Kesmodel US, Underbjerg M, et al. Predictors of intelligence at the age of 5: family, pregnancy and birth characteristics, postnatal influences, and postnatal growth. *PLoS One* 2013;8(11):e79200. doi: 10.1371/journal.pone.0079200
8. Lean RE, Paul RA, Smyser CD, et al. Maternal intelligence quotient (IQ) predicts IQ and language in very preterm children at age 5 years. *J Child Psychol Psychiatry* 2018;59(2):150-59. doi: 10.1111/jcpp.12810

- 1  
2  
3  
4 9. Kirkegaard I, Obel C, Hedegaard M, et al. Gestational age and birth weight in relation to school  
5 performance of 10-year-old children: a follow-up study of children born after 32 completed weeks.  
6  
7  
8 *Pediatrics* 2006;118(4):1600-6. doi: 10.1542/peds.2005-2700  
9  
10  
11 10. Larroque B, Ancel PY, Marchand-Martin L, et al. Special care and school difficulties in 8-year-  
12 old very preterm children: the Epipage cohort study. *PLoS One* 2011;6(7):e21361. doi:  
13  
14 10.1371/journal.pone.0021361  
15  
16  
17 11. Talge NM, Holzman C, Wang J, et al. Late-preterm birth and its association with cognitive and  
18 socioemotional outcomes at 6 years of age. *Pediatrics* 2010;126(6):1124-31. doi:  
19  
20 10.1542/peds.2010-1536  
21  
22  
23 12. Kesmodel US, Underbjerg M, Kilburn TR, et al. Lifestyle during pregnancy:  
24 neurodevelopmental effects at 5 years of age. The design and implementation of a prospective  
25 follow-up study. *Scand J Public Health* 2010;38(2):208-19. doi: 10.1177/1403494809357093  
26  
27  
28 13. Kesmodel US, Eriksen HL, Underbjerg M, et al. The effect of alcohol binge drinking in early  
29 pregnancy on general intelligence in children. *BJOG* 2012;119(10):1222-31. doi: 10.1111/j.1471-  
30 0528.2012.03395.x  
31  
32  
33 14. Wechsler D. Manual for the Wechsler Preschool and Primary Scale of Intelligence-Revised.  
34 Swedish version. Stockholm: Psykologiförlaget AB 1999.  
35  
36  
37 15. Underbjerg M, Kesmodel US, Landro NI, et al. The effects of low to moderate alcohol  
38 consumption and binge drinking in early pregnancy on selective and sustained attention in 5-year-  
39 old children. *BJOG* 2012;119(10):1211-21. doi: 10.1111/j.1471-0528.2012.03396.x  
40  
41  
42  
43 16. Gioia GA, Isquith PK, Guy SC, et al. TEST REVIEW Behavior Rating Inventory of Executive  
44 Function. *Child Neuropsychol* 2000;6(3):235-38.  
45  
46  
47  
48 17. Greenland S, Pearl J, Robins JM. Causal diagrams for epidemiologic research. *Epidemiology*  
49 1999;10(1):37-48.  
50  
51  
52  
53  
54  
55  
56  
57  
58  
59  
60

1  
2  
3  
4  
5  
6  
7  
8  
9  
10  
11  
12  
13  
14  
15  
16  
17  
18  
19  
20  
21  
22  
23  
24  
25  
26  
27  
28  
29  
30  
31  
32  
33  
34  
35  
36  
37  
38  
39  
40  
41  
42  
43  
44  
45  
46  
47  
48  
49  
50  
51  
52  
53  
54  
55  
56  
57  
58  
59  
60

18. Raven J, Court J, Raven J. Manual for Raven's Progressive Matrices and Vocabulary Scales. Oxford: Oxford Psychologists Press 1998.
19. Wechsler D. Manual for the Wechsler Adult Intelligence Scale. New York, NY: The Psychological Corporation 1955.
20. Marsal K, Persson PH, Larsen T, et al. Intrauterine growth curves based on ultrasonically estimated foetal weights. *Acta Paediatr* 1996;85(7):843-8.
21. Kesmodel US, Bertrand J, Stovring H, et al. The effect of different alcohol drinking patterns in early to mid pregnancy on the child's intelligence, attention, and executive function. *BJOG* 2012;119(10):1180-90. doi: 10.1111/j.1471-0528.2012.03393.x
22. Sundhedsstyrelsen. Fødselsregisteret 1997-2001. Nye tal fra Sundhedsstyrelsen. Årgang 7. Nr. 12, 2003.
23. Nohr EA, Liew Z. How to investigate and adjust for selection bias in cohort studies. *Acta Obstet Gynecol Scand* 2018;97(4):407-16. doi: 10.1111/aogs.13319
24. Bhutta AT, Cleves MA, Casey PH, et al. Cognitive and behavioral outcomes of school-aged children who were born preterm: a meta-analysis. *JAMA* 2002;288(6):728-37.
25. Chan E, Leong P, Malouf R, et al. Long-term cognitive and school outcomes of late-preterm and early-term births: a systematic review. *Child Care Health Dev* 2016;42(3):297-312. doi: 10.1111/cch.12320
26. Joseph RM, O'Shea TM, Allred EN, et al. Neurocognitive and Academic Outcomes at Age 10 Years of Extremely Preterm Newborns. *Pediatrics* 2016;137(4) doi: 10.1542/peds.2015-4343
27. Brumbaugh JE, Hodel AS, Thomas KM. The impact of late preterm birth on executive function at preschool age. *Am J Perinatol* 2014;31(4):305-14. doi: 10.1055/s-0033-1348950

1  
2  
3  
4 28. Ritter BC, Perrig W, Steinlin M, et al. Cognitive and behavioral aspects of executive functions  
5 in children born very preterm. *Child Neuropsychol* 2014;20(2):129-44. doi:

6  
7  
8  
9 10.1080/09297049.2013.773968

10  
11 29. Hodel AS, Brumbaugh JE, Morris AR, et al. Hot executive function following moderate-to-late  
12 preterm birth: altered delay discounting at 4 years of age. *Dev Sci* 2016;19(2):221-34. doi:

13  
14  
15  
16 10.1111/desc.12307

17  
18 30. McCann JP, Rider GN, Weiss BA, et al. Latent mean comparisons on the BRIEF in preterm  
19 children: parent and teacher differences. *Child Neuropsychol* 2014;20(6):737-51. doi:

20  
21  
22  
23 10.1080/09297049.2013.859663  
24  
25  
26  
27  
28  
29  
30  
31  
32  
33  
34  
35  
36  
37  
38  
39  
40  
41  
42  
43  
44  
45  
46  
47  
48  
49  
50  
51  
52  
53  
54  
55  
56  
57  
58  
59  
60



## Tables

**Table 1.** Family characteristics among singletons born at term or preterm. Denmark 2003-2008 (*n*=1776)

| Characteristics                                                                                | Born at term<br>(≥37 weeks) | Late preterm<br>birth<br>(34-<37 weeks) | Moderately or very<br>preterm birth<br>(<34 weeks) <sup>a</sup> |
|------------------------------------------------------------------------------------------------|-----------------------------|-----------------------------------------|-----------------------------------------------------------------|
| <b>Number of infants (n)</b>                                                                   | 1728                        | 40                                      | 8                                                               |
| <b>Maternal age</b> (years, mean [SD])                                                         | 30.8 (4.4)                  | 30.4 (4.5)                              | 28.8 (3.4)                                                      |
| <b>Maternal pre-pregnancy BMI</b> (kg/m <sup>2</sup> , median [10/90 percentile]) <sup>b</sup> | 22.6 (19.6/28.7)            | 22.7 (18.4/33.0)                        | 22.8 (16.5/28.2)                                                |
| <b>Maternal smoking in pregnancy</b> (%)                                                       | 31.7                        | 30.0                                    | 37.5                                                            |
| <b>Maternal alcohol consumption in pregnancy</b> (%) <sup>c</sup>                              |                             |                                         |                                                                 |
| 0 drinks/week                                                                                  | 47.6                        | 55.0                                    | 50.0                                                            |
| 1-4 drinks/week                                                                                | 41.3                        | 37.5                                    | 37.5                                                            |
| 5+ drinks/week <sup>d</sup>                                                                    | 11.1                        | 7.5                                     | 12.5                                                            |
| <b>Maternal marital status</b> (%) <sup>e</sup>                                                |                             |                                         |                                                                 |
| Single <sup>f</sup>                                                                            | 12.4                        | 10.3                                    | 25.0                                                            |
| Cohabiting                                                                                     | 87.6                        | 89.7                                    | 75.0                                                            |
| <b>Maternal IQ</b> (mean [SD]) <sup>g</sup>                                                    | 100.0 (14.9)                | 97.7 (16.9)                             | 104.3 (17.9)                                                    |
| <b>Parental educational level</b> (years, mean [SD]) <sup>h</sup>                              | 13.2 (1.9)                  | 13.0 (1.6)                              | 14.2 (1.8)                                                      |
| <b>Parity</b> (%)                                                                              |                             |                                         |                                                                 |
| 0                                                                                              | 50.7                        | 60.0                                    | 87.5                                                            |
| 1                                                                                              | 32.1                        | 30.0                                    | 12.5                                                            |
| 2+                                                                                             | 17.2                        | 10.0                                    | 0.0                                                             |
| <b>Child gender</b> (%)                                                                        |                             |                                         |                                                                 |
| Male                                                                                           | 51.7                        | 60.0                                    | 50.0                                                            |
| Females                                                                                        | 48.3                        | 40.0                                    | 50.0                                                            |
| <b>Gestational age</b> (days, median [10/90 percentile])                                       | 282.0<br>(269.0/293.0)      | 251.5<br>(241.0/257.5)                  | 227.5<br>(206.0/236.0)                                          |
| <b>Birthweight</b> (grams, mean [SD]) <sup>i</sup>                                             | 3627.3 (483.4)              | 2740.8 (482.6)                          | 2040.9 (458.4)                                                  |
| <b>Child age at testing</b> (years, median [10/90 percentile])                                 | 5.23 (5.12/5.30)            | 5.26 (5.13/5.31)                        | 5.23 (5.10/5.29)                                                |

N, number; SD, standard deviation; BMI, body mass index; IQ, intelligence quotient. <sup>a</sup> Lowest observation 29 weeks. <sup>b</sup> Information missing for 35 term and 1 late preterm birth. <sup>c</sup> Information missing for 1 term birth. <sup>d</sup> Range 5-14 drinks/week. <sup>e</sup> Information missing for 13 term and 1 late preterm birth. <sup>f</sup> If reported being single either during pregnancy or at follow-up at 60-64 months postpartum. <sup>g</sup> Information missing for 9 term births. <sup>h</sup> Information missing for 5 term and 1 late preterm birth. <sup>i</sup> Information missing for 12 term and 2 late preterm births.

**Table 2.** Mean differences in intelligence, attention, and executive function between 5-year-old children born at term (reference group) and children born preterm. Denmark 2003-2008 ( $n=1776$ )<sup>a</sup>

|                                               | Born at term $\geq 37$<br>weeks ( $n=1728$ ) | Late preterm birth 34- $<37$<br>weeks ( $n=40$ ) | Moderately or very preterm<br>birth $<34$ weeks ( $n=8$ ) |                    |               |
|-----------------------------------------------|----------------------------------------------|--------------------------------------------------|-----------------------------------------------------------|--------------------|---------------|
|                                               | Mean (SD)                                    | Mean<br>difference                               | 95% CI                                                    | Mean<br>difference | 95% CI        |
| <b>Intelligence (WPPSI-R)</b>                 |                                              |                                                  |                                                           |                    |               |
| <b>Full scale IQ</b>                          |                                              |                                                  |                                                           |                    |               |
| Unadjusted                                    | 105.64 (12.86)                               | -2.09                                            | -6.91, 2.74                                               | -9.22              | -20.25, 1.81  |
| Adjusted <sup>b</sup>                         |                                              | -0.05                                            | -4.62, 4.53                                               | -10.56             | -19.37, -1.75 |
| <b>Verbal IQ</b>                              |                                              |                                                  |                                                           |                    |               |
| Unadjusted                                    | 104.81 (10.80)                               | -1.73                                            | -5.23, 1.76                                               | -7.11              | -15.64, 1.41  |
| Adjusted                                      |                                              | -0.40                                            | -4.84, 4.05                                               | -7.41              | -13.37, -1.45 |
| <b>Performance IQ</b>                         |                                              |                                                  |                                                           |                    |               |
| Unadjusted                                    | 105.14 (16.22)                               | -2.00                                            | -9.02, 5.03                                               | -9.51              | -20.46, 1.45  |
| Adjusted                                      |                                              | 0.38                                             | -5.39, 6.15                                               | -11.71             | -21.89, -1.52 |
| <b>Attention (TEACH-5)</b>                    |                                              |                                                  |                                                           |                    |               |
| <b>Overall attention</b>                      |                                              |                                                  |                                                           |                    |               |
| Unadjusted                                    | 0.01 (1.00)                                  | -0.21                                            | -0.70, 0.28                                               | -0.10              | -0.72, 0.52   |
| Adjusted                                      |                                              | -0.16                                            | -0.59, 0.26                                               | -0.25              | -1.00, 0.50   |
| <b>Sustained attention</b>                    |                                              |                                                  |                                                           |                    |               |
| Unadjusted                                    | 0.01 (1.00)                                  | -0.39                                            | -0.76, -0.01                                              | -0.09              | -0.62, 0.44   |
| Adjusted                                      |                                              | -0.23                                            | -0.64, 0.19                                               | -0.16              | -0.83, 0.52   |
| <b>Selective attention</b>                    |                                              |                                                  |                                                           |                    |               |
| Unadjusted                                    | 0.00 (1.00)                                  | 0.09                                             | -0.46, 0.63                                               | 0.02               | -0.41, 0.45   |
| Adjusted                                      |                                              | 0.06                                             | -0.42, 0.53                                               | -0.19              | -0.65, 0.27   |
| <b>Executive function (BRIEF)<sup>c</sup></b> |                                              |                                                  |                                                           |                    |               |
| <b>- Parent version</b>                       |                                              |                                                  |                                                           |                    |               |
| <b>Global Executive Composite</b>             |                                              |                                                  |                                                           |                    |               |
| Unadjusted                                    | 49.97 (9.98)                                 | 1.44                                             | -4.03, 6.90                                               | -0.39              | -16.52, 15.74 |
| Adjusted                                      |                                              | 2.26                                             | -2.01, 6.53                                               | -0.20              | -14.27, 13.87 |
| <b>Behavioural Regulation Index</b>           |                                              |                                                  |                                                           |                    |               |
| Unadjusted                                    | 50.01 (9.98)                                 | -0.35                                            | -5.50, 4.79                                               | -1.18              | -16.17, 13.81 |
| Adjusted                                      |                                              | 0.40                                             | -3.97, 4.76                                               | -1.95              | -14.87, 10.97 |
| <b>Metacognition Index</b>                    |                                              |                                                  |                                                           |                    |               |
| Unadjusted                                    | 49.95 (9.98)                                 | 2.41                                             | -3.10, 7.92                                               | 0.13               | -15.24, 15.51 |
| Adjusted                                      |                                              | 3.19                                             | -1.11, 7.49                                               | 0.90               | -12.60, 14.41 |
| <b>- Teacher version</b>                      |                                              |                                                  |                                                           |                    |               |
| <b>Global Executive Composite</b>             |                                              |                                                  |                                                           |                    |               |
| Unadjusted                                    | 49.94 (10.03)                                | 4.47                                             | -0.77, 9.70                                               | 5.47               | 2.57, 8.36    |
| Adjusted                                      |                                              | 3.99                                             | -0.82, 8.81                                               | 5.33               | 2.39, 8.27    |
| <b>Behavioural Regulation Index</b>           |                                              |                                                  |                                                           |                    |               |
| Unadjusted                                    | 49.95 (10.01)                                | 4.42                                             | -0.38, 9.21                                               | 5.29               | 2.08, 8.50    |
| Adjusted                                      |                                              | 3.79                                             | -0.89, 8.48                                               | 4.24               | -0.56, 9.03   |
| <b>Metacognition Index</b>                    |                                              |                                                  |                                                           |                    |               |
| Unadjusted                                    | 49.95 (10.03)                                | 4.09                                             | -1.55, 9.73                                               | 5.07               | 0.61, 9.54    |
| Adjusted                                      |                                              | 3.77                                             | -1.32, 8.85                                               | 5.46               | 1.97, 8.95    |

1  
2  
3  
4  
5  
6  
7  
8  
9  
10  
11  
12  
13  
14  
15  
16  
17  
18  
19  
20  
21  
22  
23  
24  
25  
26  
27  
28  
29  
30  
31  
32  
33  
34  
35  
36  
37  
38  
39  
40  
41  
42  
43  
44  
45  
46  
47  
48  
49  
50  
51  
52  
53  
54  
55  
56  
57  
58  
59  
60

N, number; SD, standard deviation; CI, confidence interval; WPPSI-R, Wechsler Preschool and Primary Scales of Intelligence-Revised; IQ, intelligence quotient; TEACH-5, Test of Everyday Attention for Children at Five; BRIEF, Behaviour Rating Inventory of Executive Function. <sup>a</sup> Overall number of participants. Due to complete case analyses, for the adjusted analyses, the actual number of participants for each outcome was: Full-scale IQ ( $n=1748$ ), verbal IQ ( $n=1749$ ), performance IQ ( $n=1749$ ), overall attention ( $n=1493$ ), sustained attention ( $n=1586$ ), selective attention ( $n=1612$ ), Global Executive Composite (parents,  $n=1748$ ; teachers,  $n=1525$ ), Behavioural Regulation Index (parents,  $n=1748$ ; teachers,  $n=1530$ ), Metacognition Index (parents,  $n=1748$ ; teachers,  $n=1525$ ). <sup>b</sup> All adjusted analyses adjusted for maternal age, maternal IQ, average alcohol consumption in pregnancy, smoking in pregnancy, parity, maternal marital status, parental educational level, child sex, testing psychologist, and age at testing. <sup>c</sup> A higher BRIEF score indicates more executive function difficulties (opposite than the other outcome measures).

**Table 3.** Regression coefficients for the association between gestational age (in days) and intelligence, attention, and executive function in 5-year-old children. Denmark 2003-2008 ( $n=1776$ )<sup>a</sup>

| <b>Intelligence (WPPSI-R)</b> | <b>Beta (95% CI)</b> | <b>Attention (TEACH-5)</b> | <b>Beta (95% CI)</b> | <b>Executive function (BRIEF)<sup>c</sup> - Parent version</b> | <b>Beta (95% CI)</b> | <b>Executive function (BRIEF) - Teacher version</b> | <b>Beta (95% CI)</b> |
|-------------------------------|----------------------|----------------------------|----------------------|----------------------------------------------------------------|----------------------|-----------------------------------------------------|----------------------|
| <b>Full scale IQ</b>          |                      | <b>Overall attention</b>   |                      | <b>Global Executive Composite</b>                              |                      | <b>Global Executive Composite</b>                   |                      |
| Unadjusted                    | 0.10 (0.02, 0.19)    | Unadjusted                 | 0.00 (0.00, 0.01)    | Unadjusted                                                     | -0.03 (-0.10, 0.05)  | Unadjusted                                          | -0.07 (-0.14, -0.01) |
| Adjusted <sup>b</sup>         | 0.08 (0.01, 0.15)    | Adjusted                   | 0.00 (0.00, 0.01)    | Adjusted                                                       | -0.02 (-0.08, 0.05)  | Adjusted                                            | -0.06 (-0.12, 0.01)  |
| <b>Verbal IQ</b>              |                      | <b>Sustained attention</b> |                      | <b>Behavioural Regulation Index</b>                            |                      | <b>Behavioural Regulation Index</b>                 |                      |
| Unadjusted                    | 0.07 (0.00, 0.14)    | Unadjusted                 | 0.00 (-0.01, 0.01)   | Unadjusted                                                     | -0.02 (-0.09, 0.05)  | Unadjusted                                          | -0.06 (-0.13, 0.01)  |
| Adjusted                      | 0.06 (0.00, 0.13)    | Adjusted                   | 0.00 (-0.01, 0.01)   | Adjusted                                                       | -0.01 (-0.08, 0.05)  | Adjusted                                            | -0.04 (-0.11, 0.02)  |
| <b>Performance IQ</b>         |                      | <b>Selective attention</b> |                      | <b>Metacognition Index</b>                                     |                      | <b>Metacognition Index</b>                          |                      |
| Unadjusted                    | 0.12 (0.01, 0.22)    | Unadjusted                 | 0.00 (0.00, 0.01)    | Unadjusted                                                     | -0.03 (-0.10, 0.05)  | Unadjusted                                          | -0.07 (-0.14, -0.01) |
| Adjusted                      | 0.08 (-0.01, 0.18)   | Adjusted                   | 0.00 (0.00, 0.01)    | Adjusted                                                       | -0.02 (-0.08, 0.04)  | Adjusted                                            | -0.06 (-0.12, 0.00)  |

N, number; CI, confidence interval; WPPSI-R, Wechsler Preschool and Primary Scales of Intelligence-Revised; IQ, intelligence quotient; TEACH-5, Test of Everyday Attention for Children at Five; BRIEF, Behaviour Rating Inventory of Executive Function. <sup>a</sup> Overall number of participants. Due to complete case analyses, for the adjusted analyses, the actual number of participants for each outcome was: Full-scale IQ ( $n=1748$ ), verbal IQ ( $n=1749$ ), performance IQ ( $n=1749$ ), overall attention ( $n=1493$ ), sustained attention ( $n=1586$ ), selective attention ( $n=1612$ ), Global Executive Composite (parents,  $n=1748$ ; teachers,  $n=1525$ ), Behavioural Regulation Index (parents,  $n=1748$ ; teachers,  $n=1530$ ), Metacognition Index (parents,  $n=1748$ ; teachers,  $n=1525$ ). <sup>b</sup> All adjusted analyses adjusted for maternal age, maternal IQ, average alcohol consumption in pregnancy, smoking in pregnancy, parity, maternal marital status, parental educational level, child sex, testing psychologist, and age at testing. <sup>c</sup> A higher BRIEF score reflects more executive function difficulties (opposite than the other outcome measures).

Supplementary Figure 1. Directed acyclic graph

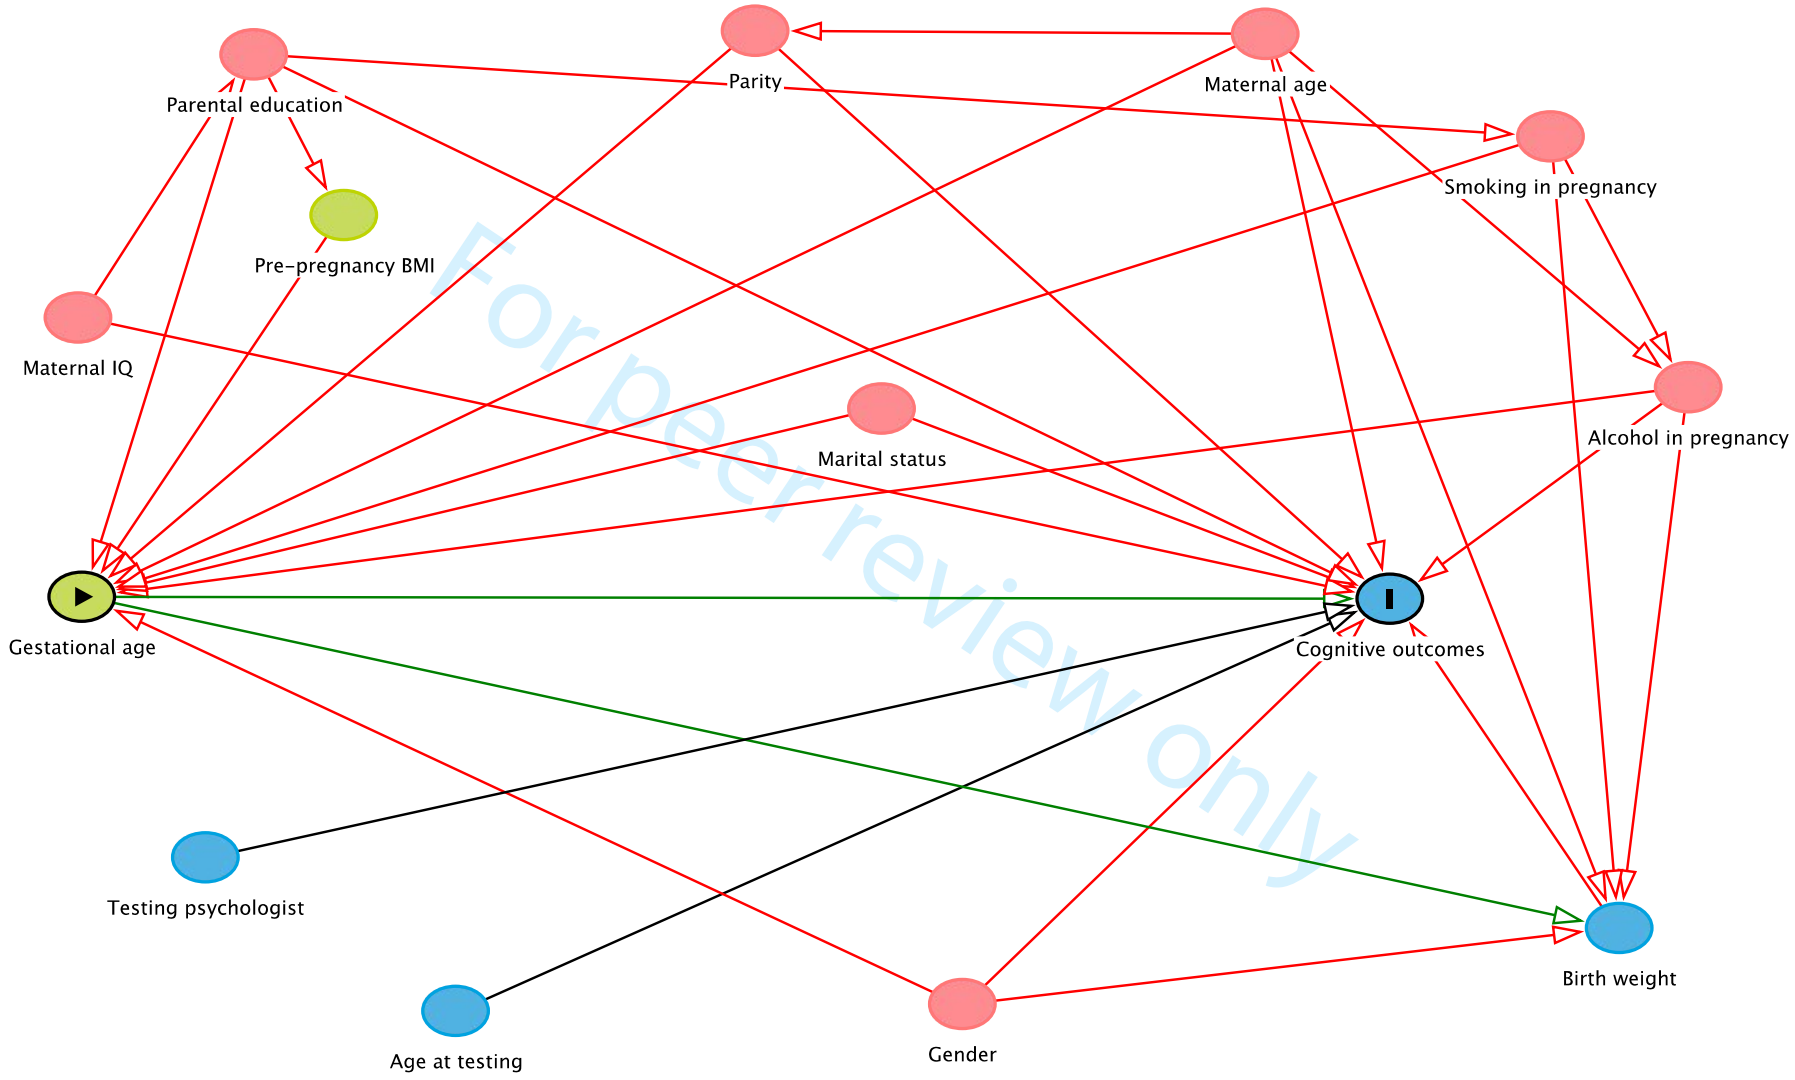

IQ, intelligence quotient; BMI, body mass index. Green circle with triangle: exposure. Blue circle with vertical rectangle: outcome. Green circle: ancestor of exposure. Blue circle: ancestor of outcome. Red circle: ancestor of exposure *and* outcome. Green connection: causal path. Red connection: biasing path. From dagitty.net.

**STROBE 2007 (v4) Statement—Checklist of items that should be included in reports of *cohort studies***

| Section/Topic                | Item # | Recommendation                                                                                                                                                                       | Reported on page # |
|------------------------------|--------|--------------------------------------------------------------------------------------------------------------------------------------------------------------------------------------|--------------------|
| <b>Title and abstract</b>    | 1      | (a) Indicate the study's design with a commonly used term in the title or the abstract                                                                                               | 1                  |
|                              |        | (b) Provide in the abstract an informative and balanced summary of what was done and what was found                                                                                  | 2-3                |
| <b>Introduction</b>          |        |                                                                                                                                                                                      |                    |
| Background/rationale         | 2      | Explain the scientific background and rationale for the investigation being reported                                                                                                 | 6                  |
| Objectives                   | 3      | State specific objectives, including any prespecified hypotheses                                                                                                                     | 7                  |
| <b>Methods</b>               |        |                                                                                                                                                                                      |                    |
| Study design                 | 4      | Present key elements of study design early in the paper                                                                                                                              | 7                  |
| Setting                      | 5      | Describe the setting, locations, and relevant dates, including periods of recruitment, exposure, follow-up, and data collection                                                      | 7-9                |
| Participants                 | 6      | (a) Give the eligibility criteria, and the sources and methods of selection of participants. Describe methods of follow-up                                                           | 7-9                |
|                              |        | (b) For matched studies, give matching criteria and number of exposed and unexposed                                                                                                  |                    |
| Variables                    | 7      | Clearly define all outcomes, exposures, predictors, potential confounders, and effect modifiers. Give diagnostic criteria, if applicable                                             | 8-11               |
| Data sources/<br>measurement | 8*     | For each variable of interest, give sources of data and details of methods of assessment (measurement). Describe comparability of assessment methods if there is more than one group | 8-9                |
| Bias                         | 9      | Describe any efforts to address potential sources of bias                                                                                                                            | 9-11               |
| Study size                   | 10     | Explain how the study size was arrived at                                                                                                                                            | 7                  |
| Quantitative variables       | 11     | Explain how quantitative variables were handled in the analyses. If applicable, describe which groupings were chosen and why                                                         | 8-11               |
| Statistical methods          | 12     | (a) Describe all statistical methods, including those used to control for confounding                                                                                                | 10-11              |
|                              |        | (b) Describe any methods used to examine subgroups and interactions                                                                                                                  | -                  |
|                              |        | (c) Explain how missing data were addressed                                                                                                                                          | 11                 |
|                              |        | (d) If applicable, explain how loss to follow-up was addressed                                                                                                                       | -                  |
|                              |        | (e) Describe any sensitivity analyses                                                                                                                                                | 10                 |
| <b>Results</b>               |        |                                                                                                                                                                                      |                    |

|                          |     |                                                                                                                                                                                                              |                 |
|--------------------------|-----|--------------------------------------------------------------------------------------------------------------------------------------------------------------------------------------------------------------|-----------------|
| Participants             | 13* | (a) Report numbers of individuals at each stage of study—eg numbers potentially eligible, examined for eligibility, confirmed eligible, included in the study, completing follow-up, and analysed            | 7               |
|                          |     | (b) Give reasons for non-participation at each stage                                                                                                                                                         | 7               |
|                          |     | (c) Consider use of a flow diagram                                                                                                                                                                           | -               |
| Descriptive data         | 14* | (a) Give characteristics of study participants (eg demographic, clinical, social) and information on exposures and potential confounders                                                                     | 11-12 + table 1 |
|                          |     | (b) Indicate number of participants with missing data for each variable of interest                                                                                                                          | Table 1         |
|                          |     | (c) Summarise follow-up time (eg, average and total amount)                                                                                                                                                  | -               |
| Outcome data             | 15* | Report numbers of outcome events or summary measures over time                                                                                                                                               | 8-9             |
| Main results             | 16  | (a) Give unadjusted estimates and, if applicable, confounder-adjusted estimates and their precision (eg, 95% confidence interval). Make clear which confounders were adjusted for and why they were included | 12 + tables 2+3 |
|                          |     | (b) Report category boundaries when continuous variables were categorized                                                                                                                                    | 10              |
|                          |     | (c) If relevant, consider translating estimates of relative risk into absolute risk for a meaningful time period                                                                                             | -               |
| Other analyses           | 17  | Report other analyses done—eg analyses of subgroups and interactions, and sensitivity analyses                                                                                                               | 12-13           |
| <b>Discussion</b>        |     |                                                                                                                                                                                                              |                 |
| Key results              | 18  | Summarise key results with reference to study objectives                                                                                                                                                     | 13              |
| <b>Limitations</b>       |     |                                                                                                                                                                                                              |                 |
| Interpretation           | 20  | Give a cautious overall interpretation of results considering objectives, limitations, multiplicity of analyses, results from similar studies, and other relevant evidence                                   | 14-16           |
| Generalisability         | 21  | Discuss the generalisability (external validity) of the study results                                                                                                                                        | 14-15           |
| <b>Other information</b> |     |                                                                                                                                                                                                              |                 |
| Funding                  | 22  | Give the source of funding and the role of the funders for the present study and, if applicable, for the original study on which the present article is based                                                | 17-18           |

\*Give information separately for cases and controls in case-control studies and, if applicable, for exposed and unexposed groups in cohort and cross-sectional studies.

**Note:** An Explanation and Elaboration article discusses each checklist item and gives methodological background and published examples of transparent reporting. The STROBE checklist is best used in conjunction with this article (freely available on the Web sites of PLoS Medicine at <http://www.plosmedicine.org/>, Annals of Internal Medicine at <http://www.annals.org/>, and Epidemiology at <http://www.epidem.com/>). Information on the STROBE Initiative is available at [www.strobe-statement.org](http://www.strobe-statement.org).

# BMJ Open

## Impact of gestational age on child intelligence, attention, and executive function at age five: a cohort study

|                                 |                                                                                                                                                                                                                                                                                                                                                                                                                                                 |
|---------------------------------|-------------------------------------------------------------------------------------------------------------------------------------------------------------------------------------------------------------------------------------------------------------------------------------------------------------------------------------------------------------------------------------------------------------------------------------------------|
| Journal:                        | <i>BMJ Open</i>                                                                                                                                                                                                                                                                                                                                                                                                                                 |
| Manuscript ID                   | bmjopen-2019-028982.R1                                                                                                                                                                                                                                                                                                                                                                                                                          |
| Article Type:                   | Research                                                                                                                                                                                                                                                                                                                                                                                                                                        |
| Date Submitted by the Author:   | 13-Jun-2019                                                                                                                                                                                                                                                                                                                                                                                                                                     |
| Complete List of Authors:       | Sejer, Emilie Pi; Herlev Hospital, Obstetrics and Gynaecology<br>Bruun, Frederik; Herlev Hospital, Obstetrics and Gynaecology<br>Slavensky, Julie Anna; Herlev Hospital, Obstetrics and Gynaecology<br>Mortensen, Erik; University of Copenhagen, Department of Public Health and Center for Healthy Ageing<br>Schjøler Kesmodel, Ulrik; Herlev Hospital, Obstetrics and Gynaecology; University of Copenhagen, Department of Clinical Medicine |
| <b>Primary Subject Heading</b>: | Obstetrics and gynaecology                                                                                                                                                                                                                                                                                                                                                                                                                      |
| Secondary Subject Heading:      | Epidemiology, Paediatrics                                                                                                                                                                                                                                                                                                                                                                                                                       |
| Keywords:                       | EPIDEMIOLOGY, Developmental neurology & neurodisability < PAEDIATRICS, OBSTETRICS, NEONATOLOGY                                                                                                                                                                                                                                                                                                                                                  |
|                                 |                                                                                                                                                                                                                                                                                                                                                                                                                                                 |

SCHOLARONE™  
Manuscripts



1  
2  
3  
4 Impact of gestational age on child intelligence, attention, and executive  
5  
6  
7 function at age five: a cohort study  
8  
9

10  
11  
12  
13 Emilie Pi Fogtmann Sejer<sup>a</sup>, MD, Frederik Jager Bruun<sup>a</sup>, Julie Anna Slavensky<sup>a</sup>, Erik Lykke  
14  
15 Mortensen<sup>b</sup>, MSc, Ulrik Schiøler Kesmodel<sup>a+c</sup>, MD, PhD  
16  
17

18  
19  
20 <sup>a</sup>Department of Obstetrics and Gynaecology, Herlev University Hospital, Herlev Ringvej 75, 2730  
21  
22 Herlev, Denmark. <sup>b</sup>Unit of Medical Psychology, Department of Public Health and Center for  
23  
24 Healthy Ageing, University of Copenhagen, Øster Farimagsgade 5, 1014 Copenhagen K, Denmark.  
25

26  
27 <sup>c</sup>Department of Clinical Medicine, University of Copenhagen, Blegdamsvej 3B, 2200 Copenhagen  
28  
29 N, Denmark  
30  
31

32  
33  
34  
35 **Corresponding author**  
36

37  
38 Emilie Pi Fogtmann Sejer, Department of Obstetrics and Gynecology, Herlev Hospital, Herlev  
39  
40 Ringvej 75, 2730 Herlev, Denmark, empifo@gmail.com  
41  
42  
43  
44  
45  
46

47 **Word count:** 3517  
48  
49  
50  
51  
52  
53  
54  
55  
56  
57  
58  
59  
60

## Abstract

**Objectives:** Preterm birth can affect cognition, but other factors including parental education and intelligence may also play a role, but few studies have adjusted for these potential confounders.

We aimed to assess the impact of gestational age (GA), late preterm birth (34 to <37 weeks GA), and very to moderately preterm birth (<34 weeks GA) on intelligence, attention, and executive function in a population of 5-year-old Danish children.

**Design:** Population-based prospective cohort study.

**Setting:** Denmark 2003-2008.

**Participants:** A cohort of 1776 children and their mothers sampled from the Danish National Birth Cohort with information on GA, family and background factors, and completed neuropsychological assessment at age five.

**Primary outcome measures:** Wechsler Preschool and Primary Scale of Intelligence-Revised, Test of Everyday Attention for Children at Five, and Behaviour Rating Inventory of Executive Function scores.

**Results:** For preterm birth <34 weeks GA ( $n=8$ ), the mean difference in full-scale intelligence quotient was -10.6 points [95% confidence interval; -19.4 to -1.8] when compared to the term group  $\geq 37$  weeks GA ( $n=1728$ ), and adjusted for potential confounders. For the teacher-assessed Global Executive Composite, the mean difference was 5.3 points [2.4 to 8.3] in the adjusted analysis, indicating more executive function difficulties in the preterm group <34 weeks GA compared to the term group. Maternal intelligence and parental education were weak confounders. No associations between late preterm birth 34 to <37 weeks GA ( $n=40$ ) and poor cognition were shown.

1  
2  
3  
4 **Conclusions:** This study showed substantially lower intelligence and poorer executive function in  
5 children born <34 weeks GA compared to children born at term. GA has an essential role in  
6 determining cognitive abilities independent of maternal intelligence and parental education. Studies  
7 with larger sample sizes are needed to confirm these findings, as the proportion of children born  
8 preterm in this study population was small.  
9  
10  
11  
12  
13  
14  
15  
16  
17  
18  
19  
20  
21  
22  
23  
24  
25  
26  
27  
28  
29  
30  
31  
32  
33  
34  
35  
36  
37  
38  
39  
40  
41  
42  
43  
44  
45  
46  
47  
48  
49  
50  
51  
52  
53  
54  
55  
56  
57  
58  
59  
60

For peer review only

## Article summary

### Strengths and limitations of this study

- In this study population, thorough information on family and background factors that may influence the cognitive outcome of a child was obtained.
- Directed acyclic graphs were composed to identify potential confounders prior to data analysis, and it was possible to adjust for an extensive set of confounders.
- The study population was sampled based on average alcohol consumption and binge drinking during pregnancy and may not be representative for the entire population, however, sample weights were applied in analyses to accommodate this.
- Robust standard errors were used to account for the sample design, possible deviations from normality and variance homogeneity.
- The proportion of children born preterm in this study population was small (48 out of 1776), which limited our power to detect any true differences as significant.

### Keywords

Attention, child development, executive function, gestational age, intelligence, preterm birth.

### Abbreviations

GA: gestational age

LDPS: Lifestyle During Pregnancy Study

DNBC: Danish National Birth Cohort

1  
2  
3  
4 IQ: intelligence quotient  
5

6 WPPSI-R: Wechsler Preschool and Primary Scales of Intelligence-Revised  
7

8  
9 VIQ: verbal intelligence quotient  
10

11 PIQ: performance intelligence quotient  
12

13 FIQ: full-scale intelligence quotient  
14

15  
16 TEACH-5: Test of Everyday Attention for Children at Five  
17

18 SD: standard deviation  
19

20 BRIEF: Behaviour Rating Inventory of Executive Function  
21

22  
23 GEC: Global Executive Composite  
24

25 BRI: Behavioural Regulation Index  
26

27 MI: Metacognition Index  
28

29  
30 DAG: directed acyclic graph  
31

32 CI: confidence interval  
33  
34  
35  
36  
37  
38  
39  
40  
41  
42  
43  
44  
45  
46  
47  
48  
49  
50  
51  
52  
53  
54  
55  
56  
57  
58  
59  
60

## INTRODUCTION

In the past decades there has been an increase in the number of children being born preterm.<sup>1</sup>

Advances in treatment have led to lower mortality rates, but morbidity rates have not been reduced to the same degree.<sup>2</sup> Many organs are vulnerable to preterm birth, and the preterm brain in particular can suffer long-term neurological impairments.<sup>3</sup> A dose-response relationship has been proposed, suggesting that the lower the gestational age (GA), the higher the risk of cognitive impairment.<sup>4</sup>

A study showed that at age five 10% of children born preterm still received care in centres specialised for children with disabilities compared to 2% of children born at term (odds ratio 7.9 [95% CI; 3.5 to 18.0]).<sup>5</sup> Hence, it is important to determine the association between preterm birth and cognitive outcomes in order to advise women at risk of preterm delivery and to give informed predictions about the future. Also, the knowledge can be of value to the obstetrician and paediatrician when making decisions about time and mode of delivery and on whether or not resuscitation should be offered at a GA as low as 22-24 weeks.

Previous studies have shown associations between preterm birth and low intelligence, attention deficits, and impaired executive function.<sup>4 6</sup> These negative outcomes may in part be a consequence of low GA, but other biological and social factors including parental education and intelligence may also affect the cognitive outcome of a child. In our dataset, parental education and maternal intelligence quotient (IQ) have proven to be strong predictors of child IQ,<sup>7</sup> and a recent study has shown that maternal IQ predicts IQ in very preterm children at age five.<sup>8</sup> Thus, it is important to adjust for these potential confounders when investigating an association between preterm birth and cognitive outcomes. Previous studies have adjusted for parental education,<sup>9 10</sup> but to our knowledge,

1  
2  
3  
4 only one study<sup>11</sup> has adjusted for maternal intelligence. In that study children born before 34 weeks  
5  
6 GA were excluded, and the sample size was small ( $n=336$ ).  
7  
8

9  
10 The aim of our study was to investigate the influence of GA, late preterm birth (34 to <37 weeks  
11  
12 GA), and very to moderately preterm birth (<34 weeks GA) on intelligence, attention, and executive  
13  
14 function in a population of 5-year-old Danish children adjusted for relevant confounders including  
15  
16 parental educational level and maternal intelligence.  
17  
18

## 23 MATERIAL AND METHODS

### 27 Study sample

29  
30 We used data from the Lifestyle During Pregnancy Study (LDPS),<sup>12</sup> which is a sample from the  
31  
32 Danish National Birth Cohort (DNBC). The DNBC contains information on 101 042 Danish  
33  
34 women and their children recruited from 1997 to 2003. Of the invited women, 60% chose to  
35  
36 participate, and 30% of all pregnant women at that time were included.  
37  
38

39  
40 A total of 3478 women with singleton pregnancies were sampled from the DNBC and invited to  
41  
42 participate in the LDPS from 2003 to 2008. Participants were sampled in strata defined by the  
43  
44 prenatal maternal average alcohol intake with oversampling of women reporting a relatively high  
45  
46 alcohol intake or binge drinking episodes during pregnancy.<sup>12 13</sup> Out of the sampled mother and  
47  
48 child pairs, 1776 children had neuropsychological tests performed at age five and had information  
49  
50 on GA available, and thus were included in our analyses. There were no considerable differences  
51  
52 between the participants and non-participants with regard to maternal age, body mass index, parity,  
53  
54 marital status, prenatal smoking and alcohol consumption, child sex, birthweight, and gestational  
55  
56 age at birth.<sup>13</sup> Exclusion criteria were multiple pregnancies and congenital diseases with a large risk  
57  
58  
59  
60

1  
2  
3  
4 of mental retardation (the diagnostic term used at the time of data collection), as they represent a  
5  
6 fundamentally different group of individuals that may not be representative of the norm. Other  
7  
8 exclusion criteria were inability to speak Danish, and impaired vision or hearing abilities preventing  
9  
10 the child from completing the tests.<sup>12</sup>  
11  
12

### 13 14 **Data collection**

#### 15 16 17 Exposure variables

18  
19  
20 Information on GA was obtained from the Danish Medical Birth Register and determined by  
21  
22 ultrasound, while date of last menses was only used to determine GA in very few cases where an  
23  
24 ultrasound estimate was not available. We used GA as 1) a continuous variable (days) and 2) a  
25  
26 categorical variable, comparing *late preterm* birth (34 to <37 completed weeks of gestation) and  
27  
28 *very to moderately preterm* birth (GA<34 weeks) with birth at *term* (GA ≥37 weeks), respectively.  
29  
30  
31

#### 32 33 Outcome measures

34  
35  
36 At child age five (age span: 60-64 months chronological age), a neuropsychological test battery was  
37  
38 administered by specially trained psychologists.  
39  
40

#### 41 42 *Intelligence*

43  
44  
45 The child's IQ was assessed using the Wechsler Preschool and Primary Scales of Intelligence-  
46  
47 Revised (WPPSI-R).<sup>14</sup> WPPSI-R includes five verbal and five performance subtests that are used to  
48  
49 calculate an overall verbal IQ (VIQ), overall performance IQ (PIQ), and full-scale IQ (FIQ). In this  
50  
51 test battery, only three of the verbal (arithmetic, information, and vocabulary) and three of the  
52  
53 performance (block design, geometric design, and object assembly) subtests were carried out to  
54  
55 ensure the child's cooperation throughout the testing. Standard procedures were used to prorated  
56  
57 scores from the shortened test. Swedish norms were applied to derive the IQ scores, since no  
58  
59  
60



1  
2  
3  
4 Danish norms exist. This should not affect any comparisons made internally within the sample with  
5  
6 respect to GA differences.  
7

### 8 9 10 *Attention*

11  
12 Attention measures were assessed with the Test of Everyday Attention for Children at Five  
13 (TEACh-5).<sup>15</sup> For this study, two subtests assessing selective attention ('Great Balloon Hunt' and  
14  
15 'Hide and Seek II') and two subtests assessing sustained attention ('Barking' and 'Draw a line')  
16  
17 were used. Each subtest score was standardised to a mean of 0 and a standard deviation (SD) of 1.  
18  
19 To calculate composite scores for overall, selective, and sustained attention, the means of the  
20  
21 respective standardised subtest scores for each individual were calculated and re-standardised to a  
22  
23 mean of 0 and SD of 1.  
24  
25  
26  
27

### 28 29 30 *Executive function*

31  
32 Executive function was assessed using the Behaviour Rating Inventory of Executive Function  
33 (BRIEF) questionnaire.<sup>16</sup> The questionnaire consists of two versions, one for parents and one for  
34  
35 teachers. Each questionnaire evaluates eight domains of executive functioning and form the Global  
36  
37 Executive Composite (GEC). Three of the eight domains form the Behavioural Regulation Index  
38  
39 (BRI), and five of the domains form the Metacognition Index (MI). Since the eight domains do not  
40  
41 follow a normal distribution, we performed a normalising t-score transformation to standardise each  
42  
43 domain to a mean of 50 and SD of 10. To compute the GEC, BRI, and MI, the means of the  
44  
45 respective domains for each individual were calculated and re-standardised to a mean of 50 and SD  
46  
47 of 10. For all BRIEF scores, a higher score indicates more executive function difficulties.  
48  
49  
50  
51  
52

### 53 54 55 *Covariates*

56  
57  
58  
59  
60

1  
2  
3  
4 To identify relevant covariates, we constructed directed acyclic graphs (DAGs)<sup>17</sup> using the  
5 graphical tool DAGitty.<sup>18</sup>  
6  
7

8  
9 Important covariates were obtained from prenatal and postnatal telephone interviews, a parent-  
10 administered questionnaire at follow-up, the Danish social security number, and the MBR. In  
11 addition, the mother's intelligence was assessed at follow-up with Raven's Standard Progressive  
12 Matrices<sup>19</sup> and two subtests (vocabulary and information) of the Wechsler Adult Intelligence  
13 Scale.<sup>20</sup> The three test results were weighted equally and combined to derive an IQ score.  
14  
15  
16  
17  
18  
19  
20

21 Prior to analysis, we evaluated the five lowest and five highest observations for all outcomes and  
22 covariates to detect unrealistic values ( $\pm 4$  SD for the normally distributed data). This resulted in  
23 removal of three birthweight observations (one from the term group and two from the late preterm  
24 group) that exceeded our threshold when evaluated according to Danish standards.<sup>21</sup> Moreover, we  
25 removed one unrealistic body mass index of 13.9 kg/m<sup>2</sup> and one observation of average alcohol  
26 intake of 36 drinks/week during pregnancy (from the term group).  
27  
28  
29  
30  
31  
32  
33  
34

### 35 36 **Statistical analyses**

37  
38  
39 We performed multivariable linear regression using SAS, Version 9.4 (© SAS Institute Inc., Cary,  
40 NC, USA).  
41  
42

43 We assessed term vs. late preterm birth and term vs. very or moderately preterm birth. We adjusted  
44 for a set of a priori defined variables. This included maternal age at birth (continuous), maternal IQ  
45 (continuous), average alcohol consumption in pregnancy (0, 1-4, 5+ drinks per week), smoking in  
46 pregnancy (yes/no), parity (0, 1, 2+), maternal marital status (single/cohabitating), parental  
47 educational level (total duration in years averaged for both parents, if information on the father was  
48 missing, maternal only [continuous]), and child sex (male/female). Moreover, we adjusted for the  
49  
50  
51  
52  
53  
54  
55  
56  
57  
58  
59  
60

1  
2  
3  
4 psychologist administering the tests (8 categories) and age at testing (continuous). We created  
5  
6 dummy variables from the categorical variables before inserting them in the regression models.  
7  
8

9  
10 In the study sample, maternal IQ and parental educational level are important predictors of child  
11  
12 intelligence,<sup>7</sup> and in order to evaluate the importance of adjusting for these factors, sensitivity  
13  
14 analyses were conducted removing these two factors separately and simultaneously from the  
15  
16 regression models. Moreover, to investigate how much of the effect that could be attributed to  
17  
18 birthweight, we inserted this variable in the regression models.  
19  
20

21  
22 Since the women in our population were sampled based on alcohol intake during pregnancy,<sup>22</sup> we  
23  
24 used sample weights in our analyses to account for the oversampling of women with relatively high  
25  
26 alcohol intake or binge drinking episodes.<sup>12 13</sup> To account for the complex stratified sampling  
27  
28 design and possible deviations from normality and variance homogeneity, we applied robust  
29  
30 standard errors.<sup>23</sup> All statistical tests were two-sided and with a significance level at 0.05.  
31  
32

33  
34 We performed complete case analyses, as multiple imputation strategies to handle missing data in  
35  
36 this cohort have produced essentially the same results when compared to complete case analyses.<sup>22</sup>  
37

38  
39 We investigated the possibility for collinearity between covariates and found no evidence of this, as  
40  
41 the variance inflation factor never exceeded a value of 2 for any of the covariates in the regression  
42  
43 models.  
44

45  
46 Complete information on child IQ scores was available for 99.3% of the sample, for attention scores  
47  
48 84.7%, and for executive function, 99.8% of the parents and 86.6% of the teachers had completed  
49  
50 the questionnaire. All covariates were available for 98.6% of the sample. No statistically significant  
51  
52 differences between the term and the two preterm groups were evident with regard to the proportion  
53  
54 of missing outcome and covariate data.  
55  
56

## 57 58 **Ethical approval** 59 60

1  
2  
3  
4 The data collection for the LDPS was approved by the DNBC Board of Directors, the DNBC  
5  
6 Steering committee, the regional Ethics Committee, the Danish Data Protection Agency, and the  
7  
8 Institutional Review Board at the Centers for Disease Control and Prevention. Signed informed  
9  
10 consent was obtained for the LDPS. The current study was further approved by the Danish Data  
11  
12 Protection Agency (file number 2012-58-0004).  
13  
14  
15

### 16 **Patient and public involvement**

17  
18  
19 For this study, there was no direct patient or public involvement. However, all study results within  
20  
21 the DNBC population are available to the study participants, and a participants' panel is ensuring  
22  
23 that as many participants as possible wish to continue being part of the cohort.  
24  
25  
26  
27  
28  
29

## 30 **RESULTS**

31  
32  
33 The characteristics of the 1776 mother and child pairs are presented in table 1. There were no  
34  
35 statistically significant group differences with respect to health, lifestyle, and socioeconomic  
36  
37 characteristics. Although not statistically significant, the mothers of the children born very or  
38  
39 moderately preterm were more likely to be younger, first-time mothers, without a partner, having  
40  
41 smoked during pregnancy, but they also had slightly higher IQ and longer education. The mothers  
42  
43 of the late preterm children were less likely to have consumed alcohol in pregnancy, but more likely  
44  
45 to have male births and lower IQ when compared to the other groups.  
46  
47  
48  
49

50  
51 With children born at term as the reference, the mean difference in FIQ, VIQ, and PIQ for the very  
52  
53 or moderately preterm group was -10.6 points [95% CI; -19.4 to -1.8], -7.4 points [-13.4 to -1.5],  
54  
55 and -11.7 points [-21.9 to -1.5], respectively, when adjusting for potential confounders. Among the  
56  
57 late preterm children, a tendency towards lower IQs was evident in the unadjusted analyses, but we  
58  
59  
60

1  
2  
3  
4 found no statistically significant differences after adjusting for potential confounders.

5  
6 For the attention measures, the mean differences were small, and we did not find evidence of  
7  
8 statistically significant associations.  
9

10  
11 With regard to executive function, no statistically significant findings were evident in the parents'  
12  
13 assessment. However, analyses of the teachers' assessment showed a mean difference in GEC, BRI,  
14  
15 and MI in the very or moderately preterm group of 5.3 points [95% CI; 2.4 to 8.3], 4.2 points [-0.6  
16  
17 to 9.0], and 5.5 points [2.0 to 9.0], respectively, when compared to the term group and adjusting for  
18  
19 potential confounders. For the late preterm group, the results were similar but did not reach  
20  
21 statistical significance (see table 2).  
22  
23

24  
25 Analyses with GA as a continuous variable did not alter the conclusions substantially (see table 3).

26  
27 We found a statistically significant increase in FIQ of 0.08 points [95% CI; 0.01, 0.15] per increase  
28  
29 in GA (in days) in the adjusted analysis. Similar estimates were seen in the analyses of VIQ and  
30  
31 PIQ, however we found no statistically significant associations in the adjusted analyses. For  
32  
33 teacher-assessed executive function, we found a statistically significant decrease in GEC and MI of  
34  
35 -0.07 points [95% CI; -0.14, -0.01] per increase in GA (in days) indicating better executive function  
36  
37 with increasing GA, however these estimates also became insignificant when adjusting for potential  
38  
39 confounders.  
40  
41  
42  
43

44  
45 When maternal IQ and parental education were removed from the regression analyses separately or  
46  
47 simultaneously (see supplementary table 1), the estimates of association did not change notably.

48  
49 However, when these variables were removed simultaneously from the regression, most estimates  
50  
51 became insignificant due to wider CIs.  
52

53  
54 When introducing birthweight in the regression analyses (see supplementary table 1), the  
55  
56 association between GA and all IQ outcomes became considerably weaker and were no longer  
57  
58 statistically significant. However, a trend towards lower IQ in the very or moderately preterm group  
59  
60

1  
2  
3  
4 was still evident, as the mean differences in FIQ, VIQ, and PIQ were reduced to -7.0 points [95%  
5 CI; -15.7 to 1.6], -5.9 points [-12.2 to 0.3], and -6.8 points [-16.6 to 3.0], respectively, when  
6  
7 compared to the term group. When birthweight was introduced in the analyses of attention and  
8  
9 executive function outcomes, the results did not change substantially.  
10  
11  
12

13  
14 In a post hoc analysis, we excluded the early term births (GA 37-38) and made a direct comparison  
15  
16 between the very or moderately preterm group and the term group with GA  $\geq$  39 weeks ( $n=1443$ ),  
17  
18 and the late preterm group and the term group (GA  $\geq$  39 weeks), respectively (see supplementary  
19  
20 table 2). In these analyses, the results did not change notably for any of the outcomes.  
21  
22  
23

## 24 25 26 27 28 **DISCUSSION**

### 29 30 31 **Main findings**

32  
33  
34 We found a statistically significant effect of very or moderately preterm birth on IQ and teacher-  
35  
36 assessed executive function when adjusting for potential confounders. Although maternal IQ and  
37  
38 parental education accounted for much of the variance in child IQ in this dataset,<sup>7</sup> these two factors  
39  
40 should only be considered weak confounders with no significant association with GA, as removing  
41  
42 these variables from our analyses did not alter the associations notably. However, removal of the  
43  
44 variables produced wider CIs confirming that they explain substantial parts of the variance.  
45  
46

47  
48 The inclusion of birthweight in the regression analyses for IQ outcomes attenuated the associations  
49  
50 for the very or moderately preterm group, and the results were no longer statistically significant. For  
51  
52 the late preterm group, the associations completely vanished. This could be suggestive of mediation  
53  
54 and underlines the importance of looking at GA relatively to birthweight when investigating effects  
55  
56 of preterm birth, though our results for the very to moderately preterm children indicate that there  
57  
58  
59  
60

1  
2  
3  
4 may be cognitive effects of GA which are independent of birthweight, perhaps reflecting effects of  
5  
6 very low GA on brain development.  
7  
8

### 9 10 **Strengths and limitations**

11  
12 One of the strengths of this study is the relatively large sample size with thorough information on  
13 family and background factors that may influence the cognitive outcome of a child. Specially  
14 trained psychologists, unaware of the gestational age, conducted neuropsychological tests with a  
15 high interrater reliability of 97-97.5%.<sup>12</sup> To minimise bias in our analyses, we composed DAGs to  
16 identify potential confounders prior to data analysis. Due to our large sample size, we were able to  
17 adjust for an exhaustive set of confounders. Other strengths of our study were a predefined  
18  
19  
20  
21  
22  
23  
24  
25  
26  
27  
28  
29  
30  
31  
32  
33  
34  
35  
36  
37  
38  
39  
40  
41  
42  
43  
44  
45  
46  
47  
48  
49  
50  
51  
52  
53  
54  
55  
56  
57  
58  
59  
60

Our study has some limitations. The study population was sampled based on average alcohol consumption and binge drinking during pregnancy,<sup>12 13</sup> and therefore, the sample is not representative of the entire DNBC population. We applied sample weights in the analyses to accommodate this. However, the use of weights may be problematic for small subgroups, and together with the use of robust standard errors, this approach may have reduced the power to obtain statistically significant results and widened the CIs.

Another weakness of this study is the relatively small proportion of children born preterm, especially children born very preterm (<32 weeks GA). According to MBR records from 2000 (our recruitment period was from 1997 to 2003), we would expect 6.3% of all new-borns to be born preterm.<sup>24</sup> In our population it was only 2.7%, which is equal to an underrepresentation of 57%. Only 0.2% of our sample was born very preterm, although we would expect 1.0%.<sup>24</sup> This can be a result of various factors that prevent parents with children born preterm from participating in a

1  
2  
3  
4 clinical study, in particular if the children are born very preterm and need special care.

5  
6 However, studies have shown that the influence of selection bias on several exposure-outcome  
7  
8 associations in the DNBC is limited.<sup>25</sup> We adjusted for a large number of covariates associated with  
9  
10 selection, still we cannot rule out that the low prevalence of preterm births in our cohort may have  
11  
12 limited our power to detect any true differences as statistically significant. A post hoc power  
13  
14 analysis showed that analyses comparing very or moderately preterm birth ( $n=8$ ) with birth at term  
15  
16 ( $n=1728$ ) had a power of 0.48, 0.28, and 0.59 for FIQ, VIQ, and PIQ outcomes, respectively.

17  
18 The low prevalence of preterm births also prevented us from performing analyses investigating the  
19  
20 impact of very or extremely preterm birth.  
21  
22

23  
24 Despite the limitations, especially the low number of preterm births, we believe that this study  
25  
26 contributes with important knowledge that together with existing evidence in the literature may  
27  
28 improve the clinicians' ability to advise women at risk of preterm delivery and give informed  
29  
30 predictions about the future.  
31  
32

### 33 34 35 **Interpretation**

36  
37 For the IQ outcomes, the findings in our study are generally in line with previous findings with an  
38  
39 IQ reduction of approximately 10 points in children born preterm.<sup>4,26</sup> However, in our study, this  
40  
41 clinically very relevant difference was only seen among the very or moderately preterm children,  
42  
43 and not in the late preterm group. A meta-analysis by Chan et al.<sup>27</sup> showed a statistically significant  
44  
45 impact of late preterm birth on general cognitive ability and non-verbal intelligence. Our study in  
46  
47 part contradicts these findings, as no associations between late preterm birth and IQ (full-scale,  
48  
49 verbal, and non-verbal) were found. In our unadjusted analyses, we saw a trend towards lower IQ  
50  
51 among late preterm children, but the trend disappeared when adjusting for confounders. This  
52  
53 discrepancy may reflect insufficient adjustments in other studies but also the limited power of our  
54  
55 study.  
56  
57  
58  
59  
60



1  
2  
3  
4 When assessing attention measures, we only found one statistically significant result, which might  
5  
6 be because of chance alone. This is not in line with previous findings suggesting that preterm  
7  
8 infants are at increased risk of developing eg Attention Deficit Hyperactivity Disorder with a  
9  
10 relative risk of 2.64 [95% CI 1.85, 3.78].<sup>26</sup> However, TEACH-5 has not been validated as a  
11  
12 diagnostic test, and given the unambiguous findings in the present study, it is possible that GA does  
13  
14 not have an impact on test of basic attention function.  
15  
16

17  
18  
19 In the field of executive function, it has been suggested that extremely preterm infants (<28 weeks  
20  
21 GA) are at increased risk of developing executive function difficulties.<sup>28</sup> Studies investigating the  
22  
23 association between very, moderately, or late preterm birth and poor BRIEF scores have not  
24  
25 detected any convincing deficits when evaluating the parents' questionnaire,<sup>29 30</sup> and to our  
26  
27 knowledge, the teachers' questionnaire has not previously been used for this purpose. Hodel et al.  
28  
29 detected deficits in a population of moderately to late preterm infants at the age of 9 months and at  
30  
31 4 years,<sup>31</sup> but in these studies, other executive function measures than BRIEF were applied.  
32  
33

34  
35 In extremely low birthweight children, teachers have proven to report significantly more difficulties  
36  
37 on the BRI subscale compared to the parents.<sup>32</sup> In our study, we found that teachers reported more  
38  
39 difficulties in all areas (GEC, BRI, and MI) when compared to the parents. This can be due to  
40  
41 teachers having a more objective viewpoint and being more experienced in working with children  
42  
43 with and without difficulties.  
44  
45  
46  
47  
48  
49

## 50 **CONCLUSION**

51  
52  
53  
54 This study showed significantly lower IQ and poorer executive function in children born very or  
55  
56 moderately preterm (<34 weeks GA) compared to children born at term ( $\geq 37$  weeks GA), but only  
57  
58 the differences in IQ were considered clinically relevant. No associations between late preterm birth  
59  
60

1  
2  
3  
4 (34 to <37 weeks GA) and poor cognitive outcomes were shown.  
5

6 Maternal IQ and parental education are strong predictors of child IQ in our dataset but were only  
7  
8 weak confounders of the association between GA and cognitive outcomes. Therefore, GA has an  
9  
10 essential role in determining cognitive abilities independent of maternal IQ and parental educational  
11  
12 level. Further studies with larger sample sizes to confirm these findings are needed.  
13  
14  
15  
16  
17  
18  
19

## 20 **Acknowledgements**

21  
22  
23 The authors would like to thank the participants for their participation in the study.  
24  
25  
26  
27  
28

## 29 **Contributors**

30  
31  
32 Dr. Sejer contributed to the conception and design of the study, performed data management and  
33  
34 statistical analyses, analysed and interpreted the data, drafted the initial manuscript, and wrote the  
35  
36 final manuscript with contributions from the co-authors.  
37  
38

39 Miss Slavensky and Mr. Bruun contributed to the conception and design of the study, assisted with  
40  
41 statistical analyses and interpretation of the data, and critically reviewed and revised the manuscript.  
42  
43

44 Mr. Mortensen and Dr. Kesmodel conceptualised and designed the study, analysed and interpreted  
45  
46 the data, and critically reviewed and revised the manuscript.  
47

48 All authors approved the final manuscript as submitted and agree to be accountable for all aspects  
49  
50 of the work.  
51  
52  
53  
54  
55

## 56 **Funding**

57  
58  
59  
60

1  
2  
3  
4 This work was supported by a scholarship granted by the Novo Nordisk Foundation. The LDPS was  
5 supported primarily by Centers for Disease Control and Prevention, Atlanta, Georgia, USA, and  
6  
7 supported primarily by Centers for Disease Control and Prevention, Atlanta, Georgia, USA, and  
8  
9 also from the Danish National Board of Health, the Lundbeck Foundation, Ludvig & Sara Elsass'  
10  
11 Foundation, the Augustinus Foundation, and Aase & Ejnar Danielsen's Foundation. The Danish  
12  
13 National Research Foundation established the Danish Epidemiology Science Center that initiated  
14  
15 and created the DNBC. Besides a major grant from this Foundation, additional support for the  
16  
17 DNBC was obtained from the Pharmacy Foundation, the Egmont Foundation, the March of Dimes  
18  
19 Birth Defects Foundation, the Augustinus Foundation, and the Health Foundation.  
20  
21  
22  
23  
24  
25  
26

### 27 **Competing interests**

28  
29  
30 None declared.  
31  
32  
33  
34  
35

### 36 **Data sharing statement**

37  
38  
39 No additional data are available for this study.  
40  
41  
42  
43  
44  
45  
46  
47  
48  
49  
50  
51  
52  
53  
54  
55  
56  
57  
58  
59  
60

## References

1. Langhoff-Roos J, Kesmodel U, Jacobsson B, et al. Spontaneous preterm delivery in primiparous women at low risk in Denmark: population based study. *BMJ* 2006;332(7547):937-9. doi: 10.1136/bmj.38751.524132.2F
2. Wilson-Costello D, Friedman H, Minich N, et al. Improved survival rates with increased neurodevelopmental disability for extremely low birth weight infants in the 1990s. *Pediatrics* 2005;115(4):997-1003. doi: 10.1542/peds.2004-0221
3. Saigal S, Doyle LW. An overview of mortality and sequelae of preterm birth from infancy to adulthood. *Lancet* 2008;371(9608):261-9. doi: 10.1016/S0140-6736(08)60136-1
4. Kerr-Wilson CO, Mackay DF, Smith GC, et al. Meta-analysis of the association between preterm delivery and intelligence. *J Public Health (Oxf)* 2012;34(2):209-16. doi: 10.1093/pubmed/fdr024
5. Larroque B, Ancel PY, Marret S, et al. Neurodevelopmental disabilities and special care of 5-year-old children born before 33 weeks of gestation (the EPIPAGE study): a longitudinal cohort study. *Lancet* 2008;371(9615):813-20. doi: 10.1016/S0140-6736(08)60380-3
6. Aarnoudse-Moens CS, Weisglas-Kuperus N, van Goudoever JB, et al. Meta-analysis of neurobehavioral outcomes in very preterm and/or very low birth weight children. *Pediatrics* 2009;124(2):717-28. doi: 10.1542/peds.2008-2816
7. Eriksen HL, Kesmodel US, Underbjerg M, et al. Predictors of intelligence at the age of 5: family, pregnancy and birth characteristics, postnatal influences, and postnatal growth. *PLoS One* 2013;8(11):e79200. doi: 10.1371/journal.pone.0079200
8. Lean RE, Paul RA, Smyser CD, et al. Maternal intelligence quotient (IQ) predicts IQ and language in very preterm children at age 5 years. *J Child Psychol Psychiatry* 2018;59(2):150-59. doi: 10.1111/jcpp.12810
9. Kirkegaard I, Obel C, Hedegaard M, et al. Gestational age and birth weight in relation to school performance of 10-year-old children: a follow-up study of children born after 32 completed weeks. *Pediatrics* 2006;118(4):1600-6. doi: 10.1542/peds.2005-2700
10. Larroque B, Ancel PY, Marchand-Martin L, et al. Special care and school difficulties in 8-year-old very preterm children: the Epipage cohort study. *PLoS One* 2011;6(7):e21361. doi: 10.1371/journal.pone.0021361

1  
2  
3  
4  
5  
6  
7  
8  
9  
10  
11  
12  
13  
14  
15  
16  
17  
18  
19  
20  
21  
22  
23  
24  
25  
26  
27  
28  
29  
30  
31  
32  
33  
34  
35  
36  
37  
38  
39  
40  
41  
42  
43  
44  
45  
46  
47  
48  
49  
50  
51  
52  
53  
54  
55  
56  
57  
58  
59  
60

11. Talge NM, Holzman C, Wang J, et al. Late-preterm birth and its association with cognitive and socioemotional outcomes at 6 years of age. *Pediatrics* 2010;126(6):1124-31. doi: 10.1542/peds.2010-1536
12. Kesmodel US, Underbjerg M, Kilburn TR, et al. Lifestyle during pregnancy: neurodevelopmental effects at 5 years of age. The design and implementation of a prospective follow-up study. *Scand J Public Health* 2010;38(2):208-19. doi: 10.1177/1403494809357093
13. Kesmodel US, Eriksen HL, Underbjerg M, et al. The effect of alcohol binge drinking in early pregnancy on general intelligence in children. *BJOG* 2012;119(10):1222-31. doi: 10.1111/j.1471-0528.2012.03395.x
14. Wechsler D. Manual for the Wechsler Preschool and Primary Scale of Intelligence-Revised. Swedish version. Stockholm: Psykologiförlaget AB 1999.
15. Underbjerg M, Kesmodel US, Landro NI, et al. The effects of low to moderate alcohol consumption and binge drinking in early pregnancy on selective and sustained attention in 5-year-old children. *BJOG* 2012;119(10):1211-21. doi: 10.1111/j.1471-0528.2012.03396.x
16. Gioia GA, Isquith PK, Guy SC, et al. TEST REVIEW Behavior Rating Inventory of Executive Function. *Child Neuropsychol* 2000;6(3):235-38.
17. Greenland S, Pearl J, Robins JM. Causal diagrams for epidemiologic research. *Epidemiology* 1999;10(1):37-48.
18. Textor J, Hardt J, Knoppel S. DAGitty: a graphical tool for analyzing causal diagrams. *Epidemiology* 2011;22(5):745. doi: 10.1097/EDE.0b013e318225c2be
19. Raven J, Court J, Raven J. Manual for Raven's Progressive Matrices and Vocabulary Scales. Oxford: Oxford Psychologists Press 1998.
20. Wechsler D. Manual for the Wechsler Adult Intelligence Scale. New York, NY: The Psychological Corporation 1955.
21. Marsal K, Persson PH, Larsen T, et al. Intrauterine growth curves based on ultrasonically estimated foetal weights. *Acta Paediatr* 1996;85(7):843-8.
22. Kesmodel US, Bertrand J, Stovring H, et al. The effect of different alcohol drinking patterns in early to mid pregnancy on the child's intelligence, attention, and executive function. *BJOG* 2012;119(10):1180-90. doi: 10.1111/j.1471-0528.2012.03393.x
23. Huber PJ. The behavior of maximum likelihood estimates under nonstandard conditions. *Proceedings of the Fifth Berkeley Symposium on Mathematical Statistics and Probability* 1967;1:221-33.

- 1  
2  
3  
4 24. Sundhedsstyrelsen. Fødselsregisteret 1997-2001. Nye tal fra Sundhedsstyrelsen. Årgang 7. Nr.  
5 12, 2003.  
6  
7  
8 25. Nohr EA, Liew Z. How to investigate and adjust for selection bias in cohort studies. *Acta Obstet*  
9 *Gynecol Scand* 2018;97(4):407-16. doi: 10.1111/aogs.13319  
10  
11 26. Bhutta AT, Cleves MA, Casey PH, et al. Cognitive and behavioral outcomes of school-aged  
12 children who were born preterm: a meta-analysis. *JAMA* 2002;288(6):728-37.  
13  
14 27. Chan E, Leong P, Malouf R, et al. Long-term cognitive and school outcomes of late-preterm  
15 and early-term births: a systematic review. *Child Care Health Dev* 2016;42(3):297-312. doi:  
16 10.1111/cch.12320  
17  
18 28. Joseph RM, O'Shea TM, Allred EN, et al. Neurocognitive and Academic Outcomes at Age 10  
19 Years of Extremely Preterm Newborns. *Pediatrics* 2016;137(4) doi: 10.1542/peds.2015-4343  
20  
21 29. Brumbaugh JE, Hodel AS, Thomas KM. The impact of late preterm birth on executive function  
22 at preschool age. *Am J Perinatol* 2014;31(4):305-14. doi: 10.1055/s-0033-1348950  
23  
24 30. Ritter BC, Perrig W, Steinlin M, et al. Cognitive and behavioral aspects of executive functions  
25 in children born very preterm. *Child Neuropsychol* 2014;20(2):129-44. doi:  
26 10.1080/09297049.2013.773968  
27  
28 31. Hodel AS, Brumbaugh JE, Morris AR, et al. Hot executive function following moderate-to-late  
29 preterm birth: altered delay discounting at 4 years of age. *Dev Sci* 2016;19(2):221-34. doi:  
30 10.1111/desc.12307  
31  
32 32. McCann JP, Rider GN, Weiss BA, et al. Latent mean comparisons on the BRIEF in preterm  
33 children: parent and teacher differences. *Child Neuropsychol* 2014;20(6):737-51. doi:  
34 10.1080/09297049.2013.859663  
35  
36  
37  
38  
39  
40  
41  
42  
43  
44  
45  
46  
47  
48  
49  
50  
51  
52  
53  
54  
55  
56  
57  
58  
59  
60

## Tables

**Table 1.** Family characteristics among singletons born at term or preterm. Denmark 2003-2008 (*n*=1776)

| Characteristics                                                                                | Born at term<br>(≥37 weeks) | Late preterm<br>birth<br>(34 to <37 weeks) | Moderately or very<br>preterm birth<br>(<34 weeks) <sup>a</sup> |
|------------------------------------------------------------------------------------------------|-----------------------------|--------------------------------------------|-----------------------------------------------------------------|
| <b>Number of infants (n)</b>                                                                   | 1728                        | 40                                         | 8                                                               |
| <b>Maternal age</b> (years, mean [SD])                                                         | 30.8 (4.4)                  | 30.4 (4.5)                                 | 28.8 (3.4)                                                      |
| <b>Maternal pre-pregnancy BMI</b> (kg/m <sup>2</sup> , median [10/90 percentile]) <sup>b</sup> | 22.6 (19.6/28.7)            | 22.7 (18.4/33.0)                           | 22.8 (16.5/28.2)                                                |
| <b>Maternal smoking in pregnancy</b> (%)                                                       | 31.7                        | 30.0                                       | 37.5                                                            |
| <b>Maternal alcohol consumption in pregnancy</b> (%) <sup>c</sup>                              |                             |                                            |                                                                 |
| 0 drinks/week                                                                                  | 47.6                        | 55.0                                       | 50.0                                                            |
| 1-4 drinks/week                                                                                | 41.3                        | 37.5                                       | 37.5                                                            |
| 5+ drinks/week <sup>d</sup>                                                                    | 11.1                        | 7.5                                        | 12.5                                                            |
| <b>Maternal marital status</b> (%) <sup>e</sup>                                                |                             |                                            |                                                                 |
| Single <sup>f</sup>                                                                            | 12.4                        | 10.3                                       | 25.0                                                            |
| Cohabiting                                                                                     | 87.6                        | 89.7                                       | 75.0                                                            |
| <b>Maternal IQ</b> (mean [SD]) <sup>g</sup>                                                    | 100.0 (14.9)                | 97.7 (16.9)                                | 104.3 (17.9)                                                    |
| <b>Parental educational level</b> (years, mean [SD]) <sup>h</sup>                              | 13.2 (1.9)                  | 13.0 (1.6)                                 | 14.2 (1.8)                                                      |
| <b>Parity</b> (%)                                                                              |                             |                                            |                                                                 |
| 0                                                                                              | 50.7                        | 60.0                                       | 87.5                                                            |
| 1                                                                                              | 32.1                        | 30.0                                       | 12.5                                                            |
| 2+                                                                                             | 17.2                        | 10.0                                       | 0.0                                                             |
| <b>Child sex</b> (%)                                                                           |                             |                                            |                                                                 |
| Male                                                                                           | 51.7                        | 60.0                                       | 50.0                                                            |
| Females                                                                                        | 48.3                        | 40.0                                       | 50.0                                                            |
| <b>Gestational age</b> (days, median [10/90 percentile])                                       | 282.0<br>(269.0/293.0)      | 251.5<br>(241.0/257.5)                     | 227.5<br>(206.0/236.0)                                          |
| <b>Birthweight</b> (grams, mean [SD]) <sup>i</sup>                                             | 3627.3 (483.4)              | 2740.8 (482.6)                             | 2040.9 (458.4)                                                  |
| <b>Child age at testing</b> (years, median [10/90 percentile])                                 | 5.23 (5.12/5.30)            | 5.26 (5.13/5.31)                           | 5.23 (5.10/5.29)                                                |

N, number; SD, standard deviation; BMI, body mass index; IQ, intelligence quotient. <sup>a</sup> Lowest observation 29 weeks. <sup>b</sup> Information missing for 35 term and 1 late preterm birth. <sup>c</sup> Information missing for 1 term birth. <sup>d</sup> Range 5-14 drinks/week. <sup>e</sup> Information missing for 13 term and 1 late preterm birth. <sup>f</sup> If reported being single either during pregnancy or at follow-up at 60-64 months postpartum. <sup>g</sup> Information missing for 9 term births. <sup>h</sup> Information missing for 5 term and 1 late preterm birth. <sup>i</sup> Information missing for 12 term and 2 late preterm births.

**Table 2.** Mean differences in intelligence, attention, and executive function between 5-year-old children born at term (reference group) and children born preterm. Denmark 2003-2008 ( $n=1776$ )<sup>a</sup>

|                                               | Born at term $\geq 37$<br>weeks ( $n=1728$ ) | Late preterm birth 34 to $<37$<br>weeks ( $n=40$ ) | Moderately or very preterm<br>birth $<34$ weeks ( $n=8$ ) |                    |               |
|-----------------------------------------------|----------------------------------------------|----------------------------------------------------|-----------------------------------------------------------|--------------------|---------------|
|                                               | Mean (SD)                                    | Mean<br>difference                                 | 95% CI                                                    | Mean<br>difference | 95% CI        |
| <b>Intelligence (WPPSI-R)</b>                 |                                              |                                                    |                                                           |                    |               |
| <b>Full scale IQ</b>                          |                                              |                                                    |                                                           |                    |               |
| Unadjusted                                    | 105.64 (12.86)                               | -2.09                                              | -6.91, 2.74                                               | -9.22              | -20.25, 1.81  |
| Adjusted <sup>b</sup>                         |                                              | -0.05                                              | -4.62, 4.53                                               | -10.56             | -19.37, -1.75 |
| <b>Verbal IQ</b>                              |                                              |                                                    |                                                           |                    |               |
| Unadjusted                                    | 104.81 (10.80)                               | -1.73                                              | -5.23, 1.76                                               | -7.11              | -15.64, 1.41  |
| Adjusted                                      |                                              | -0.40                                              | -4.84, 4.05                                               | -7.41              | -13.37, -1.45 |
| <b>Performance IQ</b>                         |                                              |                                                    |                                                           |                    |               |
| Unadjusted                                    | 105.14 (16.22)                               | -2.00                                              | -9.02, 5.03                                               | -9.51              | -20.46, 1.45  |
| Adjusted                                      |                                              | 0.38                                               | -5.39, 6.15                                               | -11.71             | -21.89, -1.52 |
| <b>Attention (TEACH-5)</b>                    |                                              |                                                    |                                                           |                    |               |
| <b>Overall attention</b>                      |                                              |                                                    |                                                           |                    |               |
| Unadjusted                                    | 0.01 (1.00)                                  | -0.21                                              | -0.70, 0.28                                               | -0.10              | -0.72, 0.52   |
| Adjusted                                      |                                              | -0.16                                              | -0.59, 0.26                                               | -0.25              | -1.00, 0.50   |
| <b>Sustained attention</b>                    |                                              |                                                    |                                                           |                    |               |
| Unadjusted                                    | 0.01 (1.00)                                  | -0.39                                              | -0.76, -0.01                                              | -0.09              | -0.62, 0.44   |
| Adjusted                                      |                                              | -0.23                                              | -0.64, 0.19                                               | -0.16              | -0.83, 0.52   |
| <b>Selective attention</b>                    |                                              |                                                    |                                                           |                    |               |
| Unadjusted                                    | 0.00 (1.00)                                  | 0.09                                               | -0.46, 0.63                                               | 0.02               | -0.41, 0.45   |
| Adjusted                                      |                                              | 0.06                                               | -0.42, 0.53                                               | -0.19              | -0.65, 0.27   |
| <b>Executive function (BRIEF)<sup>c</sup></b> |                                              |                                                    |                                                           |                    |               |
| <b>- Parent version</b>                       |                                              |                                                    |                                                           |                    |               |
| <b>Global Executive Composite</b>             |                                              |                                                    |                                                           |                    |               |
| Unadjusted                                    | 49.97 (9.98)                                 | 1.44                                               | -4.03, 6.90                                               | -0.39              | -16.52, 15.74 |
| Adjusted                                      |                                              | 2.26                                               | -2.01, 6.53                                               | -0.20              | -14.27, 13.87 |
| <b>Behavioural Regulation Index</b>           |                                              |                                                    |                                                           |                    |               |
| Unadjusted                                    | 50.01 (9.98)                                 | -0.35                                              | -5.50, 4.79                                               | -1.18              | -16.17, 13.81 |
| Adjusted                                      |                                              | 0.40                                               | -3.97, 4.76                                               | -1.95              | -14.87, 10.97 |
| <b>Metacognition Index</b>                    |                                              |                                                    |                                                           |                    |               |
| Unadjusted                                    | 49.95 (9.98)                                 | 2.41                                               | -3.10, 7.92                                               | 0.13               | -15.24, 15.51 |
| Adjusted                                      |                                              | 3.19                                               | -1.11, 7.49                                               | 0.90               | -12.60, 14.41 |
| <b>- Teacher version</b>                      |                                              |                                                    |                                                           |                    |               |
| <b>Global Executive Composite</b>             |                                              |                                                    |                                                           |                    |               |
| Unadjusted                                    | 49.94 (10.03)                                | 4.47                                               | -0.77, 9.70                                               | 5.47               | 2.57, 8.36    |
| Adjusted                                      |                                              | 3.99                                               | -0.82, 8.81                                               | 5.33               | 2.39, 8.27    |
| <b>Behavioural Regulation Index</b>           |                                              |                                                    |                                                           |                    |               |
| Unadjusted                                    | 49.95 (10.01)                                | 4.42                                               | -0.38, 9.21                                               | 5.29               | 2.08, 8.50    |
| Adjusted                                      |                                              | 3.79                                               | -0.89, 8.48                                               | 4.24               | -0.56, 9.03   |
| <b>Metacognition Index</b>                    |                                              |                                                    |                                                           |                    |               |
| Unadjusted                                    | 49.95 (10.03)                                | 4.09                                               | -1.55, 9.73                                               | 5.07               | 0.61, 9.54    |
| Adjusted                                      |                                              | 3.77                                               | -1.32, 8.85                                               | 5.46               | 1.97, 8.95    |



1  
2  
3  
4  
5  
6 N, number; SD, standard deviation; CI, confidence interval; WPPSI-R, Wechsler Preschool and Primary Scales of  
7 Intelligence-Revised; IQ, intelligence quotient; TEACH-5, Test of Everyday Attention for Children at Five; BRIEF,  
8 Behaviour Rating Inventory of Executive Function. <sup>a</sup> Overall number of participants. Due to complete case analyses, for  
9 the adjusted analyses, the actual number of participants for each outcome was: Full-scale IQ ( $n=1748$  [missing data for  
10 1 late preterm birth]), verbal IQ ( $n=1749$  [missing data for 1 late preterm birth]), performance IQ ( $n=1749$  [missing  
11 data for 1 late preterm birth]), overall attention ( $n=1493$  [missing data for 7 late preterm births]), sustained attention  
12 ( $n=1586$  [missing data for 4 late preterm births]), selective attention ( $n=1612$  [missing data for 4 late preterm births]),  
13 Global Executive Composite (parents,  $n=1748$  [missing data for 1 late preterm birth]; teachers,  $n=1525$  [missing data  
14 for 7 late preterm births and 1 very to moderate preterm birth]), Behavioural Regulation Index (parents,  $n=1748$   
15 [missing data for 1 late preterm birth]; teachers,  $n=1530$  [missing data for 7 late preterm births and 1 very to  
16 moderate preterm birth]), Metacognition Index (parents,  $n=1748$  [missing data for 1 late preterm birth]; teachers,  
17  $n=1525$  [missing data for 7 late preterm births and 1 very to moderate preterm birth]). <sup>b</sup> All adjusted analyses adjusted  
18 for maternal age, maternal IQ, average alcohol consumption in pregnancy, smoking in pregnancy, parity, maternal  
19 marital status, parental educational level, child sex, testing psychologist, and age at testing. <sup>c</sup> A higher BRIEF score  
20 indicates more executive function difficulties (opposite than the other outcome measures).  
21  
22  
23  
24  
25  
26  
27  
28  
29  
30  
31  
32  
33  
34  
35  
36  
37  
38  
39  
40  
41  
42  
43  
44  
45  
46  
47  
48  
49  
50  
51  
52  
53  
54  
55  
56  
57  
58  
59  
60

**Table 3.** Regression coefficients for the association between gestational age (in days) and intelligence, attention, and executive function in 5-year-old children. Denmark 2003-2008 ( $n=1776$ )<sup>a</sup>

| Intelligence (WPPSI-R) | Beta (95% CI)      | Attention (TEACH-5)        | Beta (95% CI)      | Executive function (BRIEF) <sup>c</sup> - Parent version | Beta (95% CI)       | Executive function (BRIEF) - Teacher version | Beta (95% CI)        |
|------------------------|--------------------|----------------------------|--------------------|----------------------------------------------------------|---------------------|----------------------------------------------|----------------------|
| <b>Full scale IQ</b>   |                    | <b>Overall attention</b>   |                    | <b>Global Executive Composite</b>                        |                     | <b>Global Executive Composite</b>            |                      |
| Unadjusted             | 0.10 (0.02, 0.19)  | Unadjusted                 | 0.00 (0.00, 0.01)  | Unadjusted                                               | -0.03 (-0.10, 0.05) | Unadjusted                                   | -0.07 (-0.14, -0.01) |
| Adjusted <sup>b</sup>  | 0.08 (0.01, 0.15)  | Adjusted                   | 0.00 (0.00, 0.01)  | Adjusted                                                 | -0.02 (-0.08, 0.05) | Adjusted                                     | -0.06 (-0.12, 0.01)  |
| <b>Verbal IQ</b>       |                    | <b>Sustained attention</b> |                    | <b>Behavioural Regulation Index</b>                      |                     | <b>Behavioural Regulation Index</b>          |                      |
| Unadjusted             | 0.07 (0.00, 0.14)  | Unadjusted                 | 0.00 (-0.01, 0.01) | Unadjusted                                               | -0.02 (-0.09, 0.05) | Unadjusted                                   | -0.06 (-0.13, 0.01)  |
| Adjusted               | 0.06 (0.00, 0.13)  | Adjusted                   | 0.00 (-0.01, 0.01) | Adjusted                                                 | -0.01 (-0.08, 0.05) | Adjusted                                     | -0.04 (-0.11, 0.02)  |
| <b>Performance IQ</b>  |                    | <b>Selective attention</b> |                    | <b>Metacognition Index</b>                               |                     | <b>Metacognition Index</b>                   |                      |
| Unadjusted             | 0.12 (0.01, 0.22)  | Unadjusted                 | 0.00 (0.00, 0.01)  | Unadjusted                                               | -0.03 (-0.10, 0.05) | Unadjusted                                   | -0.07 (-0.14, -0.01) |
| Adjusted               | 0.08 (-0.01, 0.18) | Adjusted                   | 0.00 (0.00, 0.01)  | Adjusted                                                 | -0.02 (-0.08, 0.04) | Adjusted                                     | -0.06 (-0.12, 0.00)  |

N, number; CI, confidence interval; WPPSI-R, Wechsler Preschool and Primary Scales of Intelligence-Revised; IQ, intelligence quotient; TEACH-5, Test of Everyday Attention for Children at Five; BRIEF, Behaviour Rating Inventory of Executive Function. <sup>a</sup>Overall number of participants. Due to complete case analyses, for the adjusted analyses, the actual number of participants for each outcome was: Full-scale IQ ( $n=1748$  [missing data for 1 late preterm birth]), verbal IQ ( $n=1749$  [missing data for 1 late preterm birth]), performance IQ ( $n=1749$  [missing data for 1 late preterm birth]), overall attention ( $n=1493$  [missing data for 7 late preterm births]), sustained attention ( $n=1586$  [missing data for 4 late preterm births]), selective attention ( $n=1612$  [missing data for 4 late preterm births]), Global Executive Composite (parents,  $n=1748$  [missing data for 1 late preterm birth]; teachers,  $n=1525$  [missing data for 7 late preterm births and 1 very to moderate preterm birth]), Behavioural Regulation Index (parents,  $n=1748$  [missing data for 1 late preterm birth]; teachers,  $n=1530$  [missing data for 7 late preterm births and 1 very to moderate preterm birth]), Metacognition Index (parents,  $n=1748$  [missing data for 1 late preterm birth]; teachers,  $n=1525$  [missing data for 7 late preterm births and 1 very to moderate preterm birth]). <sup>b</sup>All adjusted analyses adjusted for maternal age, maternal IQ, average alcohol consumption in pregnancy, smoking in pregnancy, parity, maternal marital status, parental educational level, child sex, testing psychologist, and age at testing. <sup>c</sup>A higher BRIEF score reflects more executive function difficulties (opposite than the other outcome measures).

**Supplementary table 1.** Mean differences in intelligence, attention, and executive functions between 5-year-old children born at term (reference group) and children born preterm. Denmark 2003-2008 ( $n=1776$ )

|                                             | Born at term $\geq 37$<br>weeks ( $n=1728$ ) | Late preterm birth 34 to $<37$<br>weeks ( $n=40$ ) | Moderately or very preterm<br>birth $<34$ weeks ( $n=8$ ) |                    |               |
|---------------------------------------------|----------------------------------------------|----------------------------------------------------|-----------------------------------------------------------|--------------------|---------------|
|                                             | Mean (SD)                                    | Mean<br>difference                                 | 95% CI                                                    | Mean<br>difference | 95% CI        |
| <b>Intelligence (WPPSI-R)</b>               |                                              |                                                    |                                                           |                    |               |
| <b>Full scale IQ</b>                        |                                              |                                                    |                                                           |                    |               |
| Unadjusted                                  | 105.64 (12.86)                               | -2.09                                              | -6.91, 2.74                                               | -9.22              | -20.25, 1.81  |
| Adjusted <sup>a</sup>                       |                                              | -0.05                                              | -4.62, 4.53                                               | -10.56             | -19.37, -1.75 |
| Excluding maternal IQ <sup>b</sup>          |                                              | -0.00                                              | -4.91, 4.91                                               | -11.23             | -21.00, -1.45 |
| Excluding parental education                |                                              | -0.64                                              | -5.16, 3.87                                               | -10.04             | -19.60, -0.48 |
| Excluding IQ + parental education           |                                              | -1.42                                              | -6.47, 3.63                                               | -10.34             | -22.19, 1.51  |
| With all including birthweight <sup>c</sup> |                                              | 2.21                                               | -2.82, 7.25                                               | -7.04              | -15.67, 1.59  |
| <b>Verbal IQ</b>                            |                                              |                                                    |                                                           |                    |               |
| Unadjusted                                  | 104.81 (10.80)                               | -1.73                                              | -5.23, 1.76                                               | -7.11              | -15.64, 1.41  |
| Adjusted                                    |                                              | -0.40                                              | -4.84, 4.05                                               | -7.41              | -13.37, -1.45 |
| Excluding maternal IQ                       |                                              | -0.33                                              | -4.48, 3.83                                               | -7.86              | -14.89, -0.83 |
| Excluding parental education                |                                              | -0.98                                              | -5.40, 3.44                                               | -6.89              | -13.14, -0.64 |
| Excluding IQ + parental education           |                                              | -1.53                                              | -5.55, 2.49                                               | -7.10              | -15.24, 1.05  |
| With all including birthweight              |                                              | 0.59                                               | -4.22, 5.40                                               | -5.93              | -12.19, 0.33  |
| <b>Performance IQ</b>                       |                                              |                                                    |                                                           |                    |               |
| Unadjusted                                  | 105.14 (16.22)                               | -2.00                                              | -9.02, 5.03                                               | -9.51              | -20.46, 1.45  |
| Adjusted                                    |                                              | 0.38                                               | -5.39, 6.15                                               | -11.71             | -21.89, -1.52 |
| Excluding maternal IQ                       |                                              | 0.42                                               | -6.23, 7.07                                               | -12.46             | -23.38, -1.54 |
| Excluding parental education                |                                              | -0.12                                              | -5.82, 5.59                                               | -11.28             | -22.20, -0.36 |
| Excluding IQ + parental education           |                                              | -0.93                                              | -7.85, 5.99                                               | -11.63             | -24.73, 1.47  |
| With all including birthweight              |                                              | 3.49                                               | -2.78, 9.76                                               | -6.80              | -16.60, 3.00  |
| <b>Attention (Teach-5)</b>                  |                                              |                                                    |                                                           |                    |               |
| <b>Overall attention</b>                    |                                              |                                                    |                                                           |                    |               |
| Unadjusted                                  | 0.01 (1.00)                                  | -0.21                                              | -0.70, 0.28                                               | -0.10              | -0.72, 0.52   |
| Adjusted                                    |                                              | -0.16                                              | -0.59, 0.26                                               | -0.25              | -1.00, 0.50   |
| Excluding maternal IQ                       |                                              | -0.15                                              | -0.59, 0.30                                               | -0.28              | -1.05, 0.49   |
| Excluding parental education                |                                              | -0.21                                              | -0.63, 0.22                                               | -0.22              | -0.88, 0.44   |
| Excluding IQ + parental education           |                                              | -0.21                                              | -0.67, 0.25                                               | -0.25              | -0.90, 0.40   |
| With all including birthweight              |                                              | -0.11                                              | -0.56, 0.34                                               | -0.20              | -0.98, 0.59   |
| <b>Sustained attention</b>                  |                                              |                                                    |                                                           |                    |               |
| Unadjusted                                  | 0.01 (1.00)                                  | -0.39                                              | -0.76, -0.01                                              | -0.09              | -0.62, 0.44   |
| Adjusted                                    |                                              | -0.23                                              | -0.64, 0.19                                               | -0.16              | -0.83, 0.52   |
| Excluding maternal IQ                       |                                              | -0.23                                              | -0.64, 0.18                                               | -0.17              | -0.86, 0.52   |
| Excluding parental education                |                                              | -0.25                                              | -0.66, 0.16                                               | -0.13              | -0.75, 0.48   |
| Excluding IQ + parental education           |                                              | -0.27                                              | -0.68, 0.13                                               | -0.15              | -0.75, 0.46   |
| With all including birthweight              |                                              | -0.10                                              | -0.55, 0.35                                               | 0.01               | -0.72, 0.73   |
| <b>Selective attention</b>                  |                                              |                                                    |                                                           |                    |               |
| Unadjusted                                  | 0.00 (1.00)                                  | 0.09                                               | -0.46, 0.63                                               | 0.02               | -0.41, 0.45   |
| Adjusted                                    |                                              | 0.06                                               | -0.42, 0.53                                               | -0.19              | -0.65, 0.27   |
| Excluding maternal IQ                       |                                              | 0.07                                               | -0.41, 0.56                                               | -0.20              | -0.69, 0.29   |
| Excluding parental education                |                                              | 0.03                                               | -0.45, 0.51                                               | -0.16              | -0.56, 0.24   |
| Excluding IQ + parental education           |                                              | 0.03                                               | -0.47, 0.53                                               | -0.17              | -0.57, 0.23   |
| With all including birthweight              |                                              | 0.00                                               | -0.50, 0.50                                               | -0.31              | -0.80, 0.18   |

**Executive functions (BRIEF)<sup>d</sup>****- Parent version****Global Executive Composite**

|                                   |              |      |             |       |               |
|-----------------------------------|--------------|------|-------------|-------|---------------|
| Unadjusted                        | 49.97 (9.98) | 1.44 | -4.03, 6.90 | -0.39 | -16.52, 15.74 |
| Adjusted                          |              | 2.26 | -2.01, 6.53 | -0.20 | -14.27, 13.87 |
| Excluding maternal IQ             |              | 2.23 | -2.15, 6.62 | -0.13 | -14.00, 13.73 |
| Excluding parental education      |              | 2.67 | -1.65, 7.00 | -0.58 | -15.69, 14.54 |
| Excluding IQ + parental education |              | 2.85 | -1.77, 7.47 | -0.54 | -15.79, 14.71 |
| With all including birthweight    |              | 1.62 | -2.96, 6.20 | -1.13 | -15.16, 12.90 |

**Behavioural Regulation Index**

|                                   |              |       |             |       |               |
|-----------------------------------|--------------|-------|-------------|-------|---------------|
| Unadjusted                        | 50.01 (9.98) | -0.35 | -5.50, 4.79 | -1.18 | -16.17, 13.81 |
| Adjusted                          |              | 0.40  | -3.97, 4.76 | -1.95 | -14.87, 10.97 |
| Excluding maternal IQ             |              | 0.37  | -4.06, 4.80 | -1.84 | -14.55, 10.87 |
| Excluding parental education      |              | 0.75  | -3.68, 5.18 | -2.27 | -16.08, 11.54 |
| Excluding IQ + parental education |              | 0.93  | -3.67, 5.54 | -2.21 | -16.17, 11.75 |
| With all including birthweight    |              | -0.27 | -4.92, 4.38 | -3.03 | -15.90, 9.85  |

**Metacognition Index**

|                                   |              |      |             |      |               |
|-----------------------------------|--------------|------|-------------|------|---------------|
| Unadjusted                        | 49.95 (9.98) | 2.41 | -3.10, 7.92 | 0.13 | -15.24, 15.51 |
| Adjusted                          |              | 3.19 | -1.11, 7.49 | 0.90 | -12.60, 14.41 |
| Excluding maternal IQ             |              | 3.17 | -1.24, 7.58 | 0.94 | -12.40, 14.27 |
| Excluding parental education      |              | 3.61 | -0.73, 7.95 | 0.52 | -14.03, 15.07 |
| Excluding IQ + parental education |              | 3.77 | -0.87, 8.40 | 0.54 | -14.11, 15.20 |
| With all including birthweight    |              | 2.63 | -2.01, 7.27 | 0.15 | -13.37, 13.66 |

**- Teacher version****Global Executive Composite**

|                                   |               |      |             |      |            |
|-----------------------------------|---------------|------|-------------|------|------------|
| Unadjusted                        | 49.94 (10.03) | 4.47 | -0.77, 9.70 | 5.47 | 2.57, 8.36 |
| Adjusted                          |               | 3.99 | -0.82, 8.81 | 5.33 | 2.39, 8.27 |
| Excluding maternal IQ             |               | 4.08 | -0.85, 9.02 | 5.56 | 2.55, 8.56 |
| Excluding parental education      |               | 4.06 | -0.74, 8.87 | 5.23 | 2.23, 8.23 |
| Excluding IQ + parental education |               | 4.30 | -0.67, 9.27 | 5.40 | 2.17, 8.62 |
| With all including birthweight    |               | 4.20 | -1.02, 9.42 | 5.39 | 1.67, 9.12 |

**Behavioural Regulation Index**

|                                   |               |      |             |      |              |
|-----------------------------------|---------------|------|-------------|------|--------------|
| Unadjusted                        | 49.95 (10.01) | 4.42 | -0.38, 9.21 | 5.29 | 2.08, 8.50   |
| Adjusted                          |               | 3.79 | -0.89, 8.48 | 4.24 | -0.56, 9.03  |
| Excluding maternal IQ             |               | 3.89 | -0.91, 8.70 | 4.49 | -0.26, 9.24  |
| Excluding parental education      |               | 3.81 | -0.87, 8.49 | 4.21 | -0.62, 9.05  |
| Excluding IQ + parental education |               | 4.04 | -0.78, 8.85 | 4.38 | -0.71, 9.47  |
| With all including birthweight    |               | 4.44 | -0.63, 9.52 | 4.81 | -0.72, 10.34 |

**Metacognition Index**

|                                   |               |      |             |      |            |
|-----------------------------------|---------------|------|-------------|------|------------|
| Unadjusted                        | 49.95 (10.03) | 4.09 | -1.55, 9.73 | 5.07 | 0.61, 9.54 |
| Adjusted                          |               | 3.77 | -1.32, 8.85 | 5.46 | 1.97, 8.95 |
| Excluding maternal IQ             |               | 3.84 | -1.33, 9.01 | 5.64 | 2.05, 9.23 |
| Excluding parental education      |               | 3.86 | -1.21, 8.93 | 5.32 | 1.96, 8.69 |
| Excluding IQ + parental education |               | 4.07 | -1.14, 9.29 | 5.47 | 2.03, 8.91 |
| With all including birthweight    |               | 3.66 | -1.84, 9.17 | 5.17 | 1.08, 9.25 |

N, number; SD, standard deviation; CI, confidence interval; WPPSI-R, Wechsler Preschool and Primary Scales of Intelligence-Revised; IQ, intelligence quotient; TEACH-5, Test of Everyday Attention for Children at Five; BRIEF, Behaviour Rating Inventory of Executive Function. <sup>a</sup>All adjusted analyses adjusted for maternal age, maternal IQ, average alcohol consumption in pregnancy, smoking in pregnancy, parity, maternal marital status, parental educational level, child sex, testing psychologist, and age at testing. <sup>b</sup>Adjusted for all the above-mentioned covariates except maternal IQ. <sup>c</sup>Adjusted for all the above-mentioned covariates and birthweight. <sup>d</sup>A higher BRIEF score indicates more executive function difficulties (opposite than the other outcome measures).

**Supplementary table 2.** Mean differences in intelligence, attention, and executive function between 5-year-old children born at term ( $\geq 39$ , reference group) and children born preterm. Denmark 2003-2008 ( $n=1491$ )

|                                               | Born at term $\geq 39$<br>weeks ( $n=1443$ ) | Late preterm birth 34 to $<37$<br>weeks ( $n=40$ ) | Moderately or very preterm<br>birth $<34$ weeks ( $n=8$ ) |                    |               |
|-----------------------------------------------|----------------------------------------------|----------------------------------------------------|-----------------------------------------------------------|--------------------|---------------|
|                                               | Mean (SD)                                    | Mean<br>difference                                 | 95% CI                                                    | Mean<br>difference | 95% CI        |
| <b>Intelligence (WPPSI-R)</b>                 |                                              |                                                    |                                                           |                    |               |
| <b>Full scale IQ</b>                          |                                              |                                                    |                                                           |                    |               |
| Unadjusted                                    | 105.92 (12.91)                               | -2.49                                              | -7.34, 2.35                                               | -9.63              | -20.67, 1.41  |
| Adjusted <sup>a</sup>                         |                                              | -0.22                                              | -4.84, 4.41                                               | -10.27             | -19.27, -1.26 |
| <b>Verbal IQ</b>                              |                                              |                                                    |                                                           |                    |               |
| Unadjusted                                    | 104.93 (10.71)                               | -1.95                                              | -5.46, 1.56                                               | -7.33              | -15.87, 1.20  |
| Adjusted                                      |                                              | -0.35                                              | -4.88, 4.17                                               | -7.22              | -13.31, -1.14 |
| <b>Performance IQ</b>                         |                                              |                                                    |                                                           |                    |               |
| Unadjusted                                    | 105.53 (16.27)                               | -2.51                                              | -9.56, 4.53                                               | -10.02             | -20.99, 0.95  |
| Adjusted                                      |                                              | 0.03                                               | -5.73, 5.79                                               | -11.38             | -21.60, -1.17 |
| <b>Attention (TEACH-5)</b>                    |                                              |                                                    |                                                           |                    |               |
| <b>Overall attention</b>                      |                                              |                                                    |                                                           |                    |               |
| Unadjusted                                    | 0.01 (1.00)                                  | -0.22                                              | -0.71, 0.27                                               | -0.10              | -0.73, 0.52   |
| Adjusted                                      |                                              | -0.15                                              | -0.58, 0.28                                               | -0.22              | -0.98, 0.54   |
| <b>Sustained attention</b>                    |                                              |                                                    |                                                           |                    |               |
| Unadjusted                                    | 0.01 (1.01)                                  | -0.39                                              | -0.77, -0.02                                              | -0.10              | -0.63, 0.44   |
| Adjusted                                      |                                              | -0.22                                              | -0.63, 0.20                                               | -0.15              | -0.86, 0.55   |
| <b>Selective attention</b>                    |                                              |                                                    |                                                           |                    |               |
| Unadjusted                                    | 0.00 (1.01)                                  | 0.07                                               | -0.48, 0.61                                               | 0.00               | -0.43, 0.43   |
| Adjusted                                      |                                              | 0.04                                               | -0.44, 0.53                                               | -0.15              | -0.59, 0.29   |
| <b>Executive function (BRIEF)<sup>b</sup></b> |                                              |                                                    |                                                           |                    |               |
| <b>- Parent version</b>                       |                                              |                                                    |                                                           |                    |               |
| <b>Global Executive Composite</b>             |                                              |                                                    |                                                           |                    |               |
| Unadjusted                                    | 49.75 (9.93)                                 | 1.60                                               | -3.87, 7.08                                               | -0.23              | -16.36, 15.90 |
| Adjusted                                      |                                              | 2.48                                               | -1.80, 6.75                                               | -0.16              | -14.49, 14.17 |
| <b>Behavioural Regulation Index</b>           |                                              |                                                    |                                                           |                    |               |
| Unadjusted                                    | 49.76 (9.91)                                 | -0.09                                              | -5.24, 5.07                                               | -0.91              | -15.91, 14.08 |
| Adjusted                                      |                                              | 0.73                                               | -3.69, 5.15                                               | -1.72              | -14.67, 11.22 |
| <b>Metacognition Index</b>                    |                                              |                                                    |                                                           |                    |               |
| Unadjusted                                    | 49.77 (9.94)                                 | 2.49                                               | -3.03, 8.02                                               | 0.22               | -15.16, 15.60 |
| Adjusted                                      |                                              | 3.32                                               | -0.94, 7.59                                               | 0.82               | -13.07, 14.72 |
| <b>- Teacher version</b>                      |                                              |                                                    |                                                           |                    |               |
| <b>Global Executive Composite</b>             |                                              |                                                    |                                                           |                    |               |
| Unadjusted                                    | 49.83 (10.15)                                | 4.68                                               | -0.56, 9.93                                               | 5.69               | 2.76, 8.61    |
| Adjusted                                      |                                              | 4.12                                               | -0.78, 9.02                                               | 5.30               | 2.30, 8.30    |
| <b>Behavioural Regulation Index</b>           |                                              |                                                    |                                                           |                    |               |
| Unadjusted                                    | 49.88 (10.06)                                | 4.57                                               | -0.24, 9.39                                               | 5.45               | 2.21, 8.68    |
| Adjusted                                      |                                              | 3.95                                               | -0.72, 8.63                                               | 4.21               | -0.83, 9.24   |
| <b>Metacognition Index</b>                    |                                              |                                                    |                                                           |                    |               |
| Unadjusted                                    | 49.82 (10.14)                                | 4.33                                               | -1.33, 9.98                                               | 5.31               | 0.83, 9.80    |
| Adjusted                                      |                                              | 3.86                                               | -1.36, 9.09                                               | 5.42               | 2.20, 8.63    |

N, number; SD, standard deviation; CI, confidence interval; WPPSI-R, Wechsler Preschool and Primary Scales of

1  
2  
3  
4 Intelligence-Revised; IQ, intelligence quotient; TEACH-5, Test of Everyday Attention for Children at Five; BRIEF,  
5 Behaviour Rating Inventory of Executive Function. <sup>a</sup> All adjusted analyses adjusted for maternal age, maternal IQ,  
6 average alcohol consumption in pregnancy, smoking in pregnancy, parity, maternal marital status, parental  
7 educational level, child sex, testing psychologist, and age at testing. <sup>b</sup> A higher BRIEF score indicates more executive  
8 function difficulties (opposite than the other outcome measures).  
9  
10  
11  
12  
13  
14  
15  
16  
17  
18  
19  
20  
21  
22  
23  
24  
25  
26  
27  
28  
29  
30  
31  
32  
33  
34  
35  
36  
37  
38  
39  
40  
41  
42  
43  
44  
45  
46  
47  
48  
49  
50  
51  
52  
53  
54  
55  
56  
57  
58  
59  
60

For peer review only

**STROBE 2007 (v4) Statement—Checklist of items that should be included in reports of *cohort studies***

| Section/Topic                | Item # | Recommendation                                                                                                                                                                       | Reported on page # |
|------------------------------|--------|--------------------------------------------------------------------------------------------------------------------------------------------------------------------------------------|--------------------|
| <b>Title and abstract</b>    | 1      | (a) Indicate the study's design with a commonly used term in the title or the abstract                                                                                               | 1                  |
|                              |        | (b) Provide in the abstract an informative and balanced summary of what was done and what was found                                                                                  | 2-3                |
| <b>Introduction</b>          |        |                                                                                                                                                                                      |                    |
| Background/rationale         | 2      | Explain the scientific background and rationale for the investigation being reported                                                                                                 | 6                  |
| Objectives                   | 3      | State specific objectives, including any prespecified hypotheses                                                                                                                     | 7                  |
| <b>Methods</b>               |        |                                                                                                                                                                                      |                    |
| Study design                 | 4      | Present key elements of study design early in the paper                                                                                                                              | 7                  |
| Setting                      | 5      | Describe the setting, locations, and relevant dates, including periods of recruitment, exposure, follow-up, and data collection                                                      | 7-9                |
| Participants                 | 6      | (a) Give the eligibility criteria, and the sources and methods of selection of participants. Describe methods of follow-up                                                           | 7-9                |
|                              |        | (b) For matched studies, give matching criteria and number of exposed and unexposed                                                                                                  |                    |
| Variables                    | 7      | Clearly define all outcomes, exposures, predictors, potential confounders, and effect modifiers. Give diagnostic criteria, if applicable                                             | 8-11               |
| Data sources/<br>measurement | 8*     | For each variable of interest, give sources of data and details of methods of assessment (measurement). Describe comparability of assessment methods if there is more than one group | 8-9                |
| Bias                         | 9      | Describe any efforts to address potential sources of bias                                                                                                                            | 9-11               |
| Study size                   | 10     | Explain how the study size was arrived at                                                                                                                                            | 7                  |
| Quantitative variables       | 11     | Explain how quantitative variables were handled in the analyses. If applicable, describe which groupings were chosen and why                                                         | 8-11               |
| Statistical methods          | 12     | (a) Describe all statistical methods, including those used to control for confounding                                                                                                | 10-11              |
|                              |        | (b) Describe any methods used to examine subgroups and interactions                                                                                                                  | -                  |
|                              |        | (c) Explain how missing data were addressed                                                                                                                                          | 11                 |
|                              |        | (d) If applicable, explain how loss to follow-up was addressed                                                                                                                       | -                  |
|                              |        | (e) Describe any sensitivity analyses                                                                                                                                                | 11                 |
| <b>Results</b>               |        |                                                                                                                                                                                      |                    |

|                          |     |                                                                                                                                                                                                              |                    |
|--------------------------|-----|--------------------------------------------------------------------------------------------------------------------------------------------------------------------------------------------------------------|--------------------|
| Participants             | 13* | (a) Report numbers of individuals at each stage of study—eg numbers potentially eligible, examined for eligibility, confirmed eligible, included in the study, completing follow-up, and analysed            | 7                  |
|                          |     | (b) Give reasons for non-participation at each stage                                                                                                                                                         | 7-8                |
|                          |     | (c) Consider use of a flow diagram                                                                                                                                                                           | -                  |
| Descriptive data         | 14* | (a) Give characteristics of study participants (eg demographic, clinical, social) and information on exposures and potential confounders                                                                     | 12 + table 1       |
|                          |     | (b) Indicate number of participants with missing data for each variable of interest                                                                                                                          | Table 1            |
|                          |     | (c) Summarise follow-up time (eg, average and total amount)                                                                                                                                                  | -                  |
| Outcome data             | 15* | Report numbers of outcome events or summary measures over time                                                                                                                                               | 8-9                |
| Main results             | 16  | (a) Give unadjusted estimates and, if applicable, confounder-adjusted estimates and their precision (eg, 95% confidence interval). Make clear which confounders were adjusted for and why they were included | 12-14 + tables 2-3 |
|                          |     | (b) Report category boundaries when continuous variables were categorized                                                                                                                                    | 10-11              |
|                          |     | (c) If relevant, consider translating estimates of relative risk into absolute risk for a meaningful time period                                                                                             | -                  |
| Other analyses           | 17  | Report other analyses done—eg analyses of subgroups and interactions, and sensitivity analyses                                                                                                               | 13-14              |
| <b>Discussion</b>        |     |                                                                                                                                                                                                              |                    |
| Key results              | 18  | Summarise key results with reference to study objectives                                                                                                                                                     | 14-15              |
| <b>Limitations</b>       |     |                                                                                                                                                                                                              |                    |
| Interpretation           | 20  | Give a cautious overall interpretation of results considering objectives, limitations, multiplicity of analyses, results from similar studies, and other relevant evidence                                   | 15-17              |
| Generalisability         | 21  | Discuss the generalisability (external validity) of the study results                                                                                                                                        | 15-16              |
| <b>Other information</b> |     |                                                                                                                                                                                                              |                    |
| Funding                  | 22  | Give the source of funding and the role of the funders for the present study and, if applicable, for the original study on which the present article is based                                                | 19                 |

\*Give information separately for cases and controls in case-control studies and, if applicable, for exposed and unexposed groups in cohort and cross-sectional studies.

**Note:** An Explanation and Elaboration article discusses each checklist item and gives methodological background and published examples of transparent reporting. The STROBE checklist is best used in conjunction with this article (freely available on the Web sites of PLoS Medicine at <http://www.plosmedicine.org/>, Annals of Internal Medicine at <http://www.annals.org/>, and Epidemiology at <http://www.epidem.com/>). Information on the STROBE Initiative is available at [www.strobe-statement.org](http://www.strobe-statement.org).



# BMJ Open

## Impact of gestational age on child intelligence, attention, and executive function at age five: a cohort study

|                                 |                                                                                                                                                                                                                                                                                                                                                                                                                                                 |
|---------------------------------|-------------------------------------------------------------------------------------------------------------------------------------------------------------------------------------------------------------------------------------------------------------------------------------------------------------------------------------------------------------------------------------------------------------------------------------------------|
| Journal:                        | <i>BMJ Open</i>                                                                                                                                                                                                                                                                                                                                                                                                                                 |
| Manuscript ID                   | bmjopen-2019-028982.R2                                                                                                                                                                                                                                                                                                                                                                                                                          |
| Article Type:                   | Research                                                                                                                                                                                                                                                                                                                                                                                                                                        |
| Date Submitted by the Author:   | 31-Jul-2019                                                                                                                                                                                                                                                                                                                                                                                                                                     |
| Complete List of Authors:       | Sejer, Emilie Pi; Herlev Hospital, Obstetrics and Gynaecology<br>Bruun, Frederik; Herlev Hospital, Obstetrics and Gynaecology<br>Slavensky, Julie Anna; Herlev Hospital, Obstetrics and Gynaecology<br>Mortensen, Erik; University of Copenhagen, Department of Public Health and Center for Healthy Ageing<br>Schjøler Kesmodel, Ulrik; Herlev Hospital, Obstetrics and Gynaecology; University of Copenhagen, Department of Clinical Medicine |
| <b>Primary Subject Heading</b>: | Obstetrics and gynaecology                                                                                                                                                                                                                                                                                                                                                                                                                      |
| Secondary Subject Heading:      | Epidemiology, Paediatrics                                                                                                                                                                                                                                                                                                                                                                                                                       |
| Keywords:                       | EPIDEMIOLOGY, Developmental neurology & neurodisability < PAEDIATRICS, OBSTETRICS, NEONATOLOGY                                                                                                                                                                                                                                                                                                                                                  |
|                                 |                                                                                                                                                                                                                                                                                                                                                                                                                                                 |

SCHOLARONE™  
Manuscripts

1  
2  
3  
4 Impact of gestational age on child intelligence, attention, and executive  
5  
6  
7 function at age five: a cohort study  
8  
9

10  
11  
12  
13 Emilie Pi Fogtmann Sejer<sup>a</sup>, MD, Frederik Jager Bruun<sup>a</sup>, Julie Anna Slavensky<sup>a</sup>, Erik Lykke  
14  
15 Mortensen<sup>b</sup>, MSc, Ulrik Schiøler Kesmodel<sup>a+c</sup>, MD, PhD  
16  
17

18  
19  
20 <sup>a</sup>Department of Obstetrics and Gynaecology, Herlev University Hospital, Herlev Ringvej 75, 2730  
21  
22 Herlev, Denmark. <sup>b</sup>Unit of Medical Psychology, Department of Public Health and Center for  
23  
24 Healthy Ageing, University of Copenhagen, Øster Farimagsgade 5, 1014 Copenhagen K, Denmark.  
25

26  
27 <sup>c</sup>Department of Clinical Medicine, University of Copenhagen, Blegdamsvej 3B, 2200 Copenhagen  
28  
29 N, Denmark  
30  
31

32  
33  
34  
35 **Corresponding author**  
36

37  
38 Emilie Pi Fogtmann Sejer, Department of Obstetrics and Gynecology, Herlev Hospital, Herlev  
39  
40 Ringvej 75, 2730 Herlev, Denmark, empifo@gmail.com  
41  
42  
43  
44  
45  
46

47 **Word count:** 3529  
48  
49  
50  
51  
52  
53  
54  
55  
56  
57  
58  
59  
60

## Abstract

**Objectives:** Preterm birth can affect cognition, but other factors including parental education and intelligence may also play a role, but few studies have adjusted for these potential confounders.

We aimed to assess the impact of gestational age (GA), late preterm birth (34 to <37 weeks GA), and very to moderately preterm birth (<34 weeks GA) on intelligence, attention, and executive function in a population of 5-year-old Danish children.

**Design:** Population-based prospective cohort study.

**Setting:** Denmark 2003-2008.

**Participants:** A cohort of 1776 children and their mothers sampled from the Danish National Birth Cohort with information on GA, family and background factors, and completed neuropsychological assessment at age five.

**Primary outcome measures:** Wechsler Preschool and Primary Scale of Intelligence-Revised, Test of Everyday Attention for Children at Five, and Behaviour Rating Inventory of Executive Function scores.

**Results:** For preterm birth <34 weeks GA ( $n=8$ ), the mean difference in full-scale intelligence quotient was -10.6 points [95% confidence interval; -19.4 to -1.8] when compared to the term group  $\geq 37$  weeks GA ( $n=1728$ ), and adjusted for potential confounders. For the teacher-assessed Global Executive Composite, the mean difference was 5.3 points [2.4 to 8.3] in the adjusted analysis, indicating more executive function difficulties in the preterm group <34 weeks GA compared to the term group. Maternal intelligence and parental education were weak confounders. No associations between late preterm birth 34 to <37 weeks GA ( $n=40$ ) and poor cognition were shown.

1  
2  
3  
4  
5  
6  
7  
8  
9  
10  
11  
12  
13  
14  
15  
16  
17  
18  
19  
20  
21  
22  
23  
24  
25  
26  
27  
28  
29  
30  
31  
32  
33  
34  
35  
36  
37  
38  
39  
40  
41  
42  
43  
44  
45  
46  
47  
48  
49  
50  
51  
52  
53  
54  
55  
56  
57  
58  
59  
60

**Conclusions:** This study showed substantially lower intelligence and poorer executive function in children born <34 weeks GA compared to children born at term. GA may play an important role in determining cognitive abilities independent of maternal intelligence and parental education. Studies with larger sample sizes are needed to confirm these findings, as the proportion of children born preterm in this study population was small.

For peer review only

## Article summary

### Strengths and limitations of this study

- In this study population, thorough information on family and background factors that may influence the cognitive outcome of a child was obtained.
- Directed acyclic graphs were composed to identify potential confounders prior to data analysis, and it was possible to adjust for an extensive set of confounders.
- The study population was sampled based on average alcohol consumption and binge drinking during pregnancy and may not be representative for the entire population, however, sample weights were applied in analyses to accommodate this.
- Robust standard errors were used to account for the sample design, possible deviations from normality and variance homogeneity.
- The proportion of children born preterm in this study population was small (48 out of 1776), which limited our power to detect any true differences.

### Keywords

Attention, child development, executive function, gestational age, intelligence, preterm birth.

### Abbreviations

GA: gestational age

LDPS: Lifestyle During Pregnancy Study

DNBC: Danish National Birth Cohort

1  
2  
3  
4 IQ: intelligence quotient  
5

6 WPPSI-R: Wechsler Preschool and Primary Scales of Intelligence-Revised  
7

8  
9 VIQ: verbal intelligence quotient  
10

11 PIQ: performance intelligence quotient  
12

13 FIQ: full-scale intelligence quotient  
14

15  
16 TEACH-5: Test of Everyday Attention for Children at Five  
17

18 SD: standard deviation  
19

20 BRIEF: Behaviour Rating Inventory of Executive Function  
21

22 GEC: Global Executive Composite  
23

24 BRI: Behavioural Regulation Index  
25

26  
27 MI: Metacognition Index  
28

29 DAG: directed acyclic graph  
30

31 CI: confidence interval  
32  
33  
34  
35  
36  
37  
38  
39  
40  
41  
42  
43  
44  
45  
46  
47  
48  
49  
50  
51  
52  
53  
54  
55  
56  
57  
58  
59  
60

## INTRODUCTION

In the past decades there has been an increase in the number of children being born preterm.<sup>1</sup>

Advances in treatment have led to lower mortality rates, but morbidity rates have not been reduced to the same degree.<sup>2</sup> Many organs are vulnerable to preterm birth, and the preterm brain in particular can suffer long-term neurological impairments.<sup>3</sup> A dose-response relationship has been proposed, suggesting that the lower the gestational age (GA), the higher the risk of cognitive impairment.<sup>4</sup>

A study showed that at age five 10% of children born preterm still received care in centres specialised for children with disabilities compared to 2% of children born at term (odds ratio 7.9 [95% CI; 3.5 to 18.0]).<sup>5</sup> Hence, it is important to determine the association between preterm birth and cognitive outcomes in order to advise women at risk of preterm delivery and to give informed predictions about the future. Also, the knowledge can be of value to the obstetrician and paediatrician when making decisions about time and mode of delivery and on whether or not resuscitation should be offered at a GA as low as 22-24 weeks.

Previous studies have shown associations between preterm birth and low intelligence, attention deficits, and impaired executive function.<sup>4 6</sup> These negative outcomes may in part be a consequence of low GA, but other biological and social factors including parental education and intelligence may also affect the cognitive outcome of a child. In our dataset, parental education and maternal intelligence quotient (IQ) have proven to be strong predictors of child IQ,<sup>7</sup> and a recent study has shown that maternal IQ predicts IQ in very preterm children at age five.<sup>8</sup> Thus, it is important to adjust for these potential confounders when investigating an association between preterm birth and cognitive outcomes. Previous studies have adjusted for parental education,<sup>9 10</sup> but to our knowledge,

1  
2  
3  
4 only one study<sup>11</sup> has adjusted for maternal intelligence. In that study children born before 34 weeks  
5  
6 GA were excluded, and the sample size was small ( $n=336$ ).  
7  
8

9  
10 The aim of our study was to investigate the influence of GA, late preterm birth (34 to <37 weeks  
11  
12 GA), and very to moderately preterm birth (<34 weeks GA) on intelligence, attention, and executive  
13  
14 function in a population of 5-year-old Danish children adjusted for relevant confounders including  
15  
16 parental educational level and maternal intelligence.  
17  
18  
19  
20  
21  
22

## 23 **MATERIAL AND METHODS**

### 24 **Study sample**

25  
26  
27 We used data from the Lifestyle During Pregnancy Study (LDPS),<sup>12</sup> which is a sample from the  
28  
29 Danish National Birth Cohort (DNBC). The DNBC contains information on 101 042 Danish  
30  
31 women and their children recruited from 1997 to 2003. Of the invited women, 60% chose to  
32  
33 participate, and 30% of all pregnant women at that time were included.  
34  
35  
36  
37

38  
39 A total of 3478 women with singleton pregnancies were sampled from the DNBC and invited to  
40  
41 participate in the LDPS from 2003 to 2008. Participants were sampled in strata defined by the  
42  
43 prenatal maternal average alcohol intake with oversampling of women reporting a relatively high  
44  
45 alcohol intake or binge drinking episodes during pregnancy.<sup>12 13</sup> Out of the sampled mother and  
46  
47 child pairs, 1776 children had neuropsychological tests performed at age five and had information  
48  
49 on GA available, and thus were included in our analyses. There were no considerable differences  
50  
51 between the participants and non-participants with regard to maternal age, body mass index, parity,  
52  
53 marital status, prenatal smoking and alcohol consumption, child sex, birthweight, and gestational  
54  
55 age at birth.<sup>13</sup> Exclusion criteria were multiple pregnancies and congenital diseases with a large risk  
56  
57  
58  
59  
60



1  
2  
3  
4 of mental retardation (the diagnostic term used at the time of data collection), as they represent a  
5  
6 fundamentally different group of individuals that may not be representative of the norm. Other  
7  
8 exclusion criteria were inability to speak Danish, and impaired vision or hearing abilities preventing  
9  
10 the child from completing the tests.<sup>12</sup>  
11  
12

### 13 14 **Data collection**

#### 15 16 17 Exposure variables

18  
19  
20 Information on GA was obtained from the Danish Medical Birth Register and determined by  
21  
22 ultrasound, while date of last menses was only used to determine GA in very few cases where an  
23  
24 ultrasound estimate was not available. We used GA as 1) a continuous variable (days) and 2) a  
25  
26 categorical variable, comparing *late preterm* birth (34 to <37 completed weeks of gestation) and  
27  
28 *very to moderately preterm* birth (GA<34 weeks) with birth at *term* (GA ≥37 weeks), respectively.  
29  
30  
31

#### 32 33 Outcome measures

34  
35  
36 At child age five (age span: 60-64 months chronological age), a neuropsychological test battery was  
37  
38 administered by specially trained psychologists.  
39  
40

#### 41 42 *Intelligence*

43  
44  
45 The child's IQ was assessed using the Wechsler Preschool and Primary Scales of Intelligence-  
46  
47 Revised (WPPSI-R).<sup>14</sup> WPPSI-R includes five verbal and five performance subtests that are used to  
48  
49 calculate an overall verbal IQ (VIQ), overall performance IQ (PIQ), and full-scale IQ (FIQ). In this  
50  
51 test battery, only three of the verbal (arithmetic, information, and vocabulary) and three of the  
52  
53 performance (block design, geometric design, and object assembly) subtests were carried out to  
54  
55 ensure the child's cooperation throughout the testing. Standard procedures were used to prorate  
56  
57 scores from the shortened test. Swedish norms were applied to derive the IQ scores, since no  
58  
59  
60

1  
2  
3  
4 Danish norms exist. This should not affect any comparisons made internally within the sample with  
5  
6 respect to GA differences.  
7

### 8 9 10 *Attention*

11  
12 Attention measures were assessed with the Test of Everyday Attention for Children at Five  
13 (TEACh-5).<sup>15</sup> For this study, two subtests assessing selective attention ('Great Balloon Hunt' and  
14  
15 'Hide and Seek II') and two subtests assessing sustained attention ('Barking' and 'Draw a line')  
16  
17 were used. Each subtest score was standardised to a mean of 0 and a standard deviation (SD) of 1.  
18  
19 To calculate composite scores for overall, selective, and sustained attention, the means of the  
20  
21 respective standardised subtest scores for each individual were calculated and re-standardised to a  
22  
23 mean of 0 and SD of 1.  
24  
25  
26  
27

### 28 29 30 *Executive function*

31  
32 Executive function was assessed using the Behaviour Rating Inventory of Executive Function  
33 (BRIEF) questionnaire.<sup>16</sup> The questionnaire consists of two versions, one for parents and one for  
34  
35 teachers. Each questionnaire evaluates eight domains of executive functioning and form the Global  
36  
37 Executive Composite (GEC). Three of the eight domains form the Behavioural Regulation Index  
38  
39 (BRI), and five of the domains form the Metacognition Index (MI). Since the eight domains do not  
40  
41 follow a normal distribution, we performed a normalising t-score transformation to standardise each  
42  
43 domain to a mean of 50 and SD of 10. To compute the GEC, BRI, and MI, the means of the  
44  
45 respective domains for each individual were calculated and re-standardised to a mean of 50 and SD  
46  
47 of 10. For all BRIEF scores, a higher score indicates more executive function difficulties.  
48  
49  
50  
51  
52

### 53 54 55 *Covariates*

56  
57  
58  
59  
60

1  
2  
3  
4 To identify relevant covariates, we constructed directed acyclic graphs (DAGs)<sup>17</sup> using the  
5 graphical tool DAGitty.<sup>18</sup>  
6  
7

8  
9 Important covariates were obtained from prenatal and postnatal telephone interviews, a parent-  
10 administered questionnaire at follow-up, the Danish social security number, and the MBR. In  
11 addition, the mother's intelligence was assessed at follow-up with Raven's Standard Progressive  
12 Matrices<sup>19</sup> and two subtests (vocabulary and information) of the Wechsler Adult Intelligence  
13 Scale.<sup>20</sup> The three test results were weighted equally and combined to derive an IQ score.  
14  
15  
16  
17  
18  
19  
20

21 Prior to analysis, we evaluated the five lowest and five highest observations for all outcomes and  
22 covariates to detect unrealistic values ( $\pm 4$  SD for the normally distributed data). This resulted in  
23 removal of three birthweight observations (one from the term group and two from the late preterm  
24 group) that exceeded our threshold when evaluated according to Danish standards.<sup>21</sup> Moreover, we  
25 removed one unrealistic body mass index of 13.9 kg/m<sup>2</sup> and one observation of average alcohol  
26 intake of 36 drinks/week during pregnancy (from the term group).  
27  
28  
29  
30  
31  
32  
33  
34

### 35 36 **Statistical analyses**

37  
38  
39 We performed multivariable linear regression using SAS, Version 9.4 (© SAS Institute Inc., Cary,  
40 NC, USA).  
41  
42

43 We assessed term vs. late preterm birth and term vs. very or moderately preterm birth. We adjusted  
44 for a set of a priori defined variables. This included maternal age at birth (continuous), maternal IQ  
45 (continuous), average alcohol consumption in pregnancy (0, 1-4, 5+ drinks per week), smoking in  
46 pregnancy (yes/no), parity (0, 1, 2+), maternal marital status (single/cohabitating), parental  
47 educational level (total duration in years averaged for both parents, if information on the father was  
48 missing, maternal only [continuous]), and child sex (male/female). Moreover, we adjusted for the  
49  
50  
51  
52  
53  
54  
55  
56  
57  
58  
59  
60

1  
2  
3  
4 psychologist administering the tests (8 categories) and age at testing (continuous). We created  
5  
6 dummy variables from the categorical variables before inserting them in the regression models.  
7  
8

9  
10 In the study sample, maternal IQ and parental educational level are important predictors of child  
11  
12 intelligence,<sup>7</sup> and in order to evaluate the importance of adjusting for these factors, sensitivity  
13  
14 analyses were conducted removing these two factors separately and simultaneously from the  
15  
16 regression models. Moreover, to investigate how much of the effect that could be attributed to  
17  
18 birthweight, we inserted this variable in the regression models.  
19  
20

21  
22 Since the women in our population were sampled based on alcohol intake during pregnancy,<sup>22</sup> we  
23  
24 used sample weights in our analyses to account for the oversampling of women with relatively high  
25  
26 alcohol intake or binge drinking episodes.<sup>12 13</sup> To account for the complex stratified sampling  
27  
28 design and possible deviations from normality and variance homogeneity, we applied robust  
29  
30 standard errors.<sup>23</sup> All statistical tests were two-sided and with a significance level at 0.05.  
31  
32

33  
34 We performed complete case analyses, as multiple imputation strategies to handle missing data in  
35  
36 this cohort have produced essentially the same results when compared to complete case analyses.<sup>22</sup>  
37

38  
39 We investigated the possibility for collinearity between covariates and found no evidence of this, as  
40  
41 the variance inflation factor never exceeded a value of 2 for any of the covariates in the regression  
42  
43 models.  
44

45  
46 Complete information on child IQ scores was available for 99.3% of the sample, for attention scores  
47  
48 84.7%, and for executive function, 99.8% of the parents and 86.6% of the teachers had completed  
49  
50 the questionnaire. All covariates were available for 98.6% of the sample. No statistically significant  
51  
52 differences between the term and the two preterm groups were evident with regard to the proportion  
53  
54 of missing outcome and covariate data.  
55  
56

## 57 58 **Ethical approval** 59 60

1  
2  
3  
4 The data collection for the LDPS was approved by the DNBC Board of Directors, the DNBC  
5  
6 Steering committee, the regional Ethics Committee, the Danish Data Protection Agency, and the  
7  
8 Institutional Review Board at the Centers for Disease Control and Prevention. Signed informed  
9  
10 consent was obtained for the LDPS. The current study was further approved by the Danish Data  
11  
12 Protection Agency (file number 2012-58-0004).  
13  
14  
15

### 16 **Patient and public involvement**

17  
18  
19 For this study, there was no direct patient or public involvement. However, all study results within  
20  
21 the DNBC population are available to the study participants, and a participants' panel is ensuring  
22  
23 that as many participants as possible wish to continue being part of the cohort.  
24  
25  
26  
27  
28  
29

## 30 **RESULTS**

31  
32  
33 The characteristics of the 1776 mother and child pairs are presented in table 1. There were no  
34  
35 statistically significant group differences with respect to health, lifestyle, and socioeconomic  
36  
37 characteristics. Although not statistically significant, the mothers of the children born very or  
38  
39 moderately preterm were more likely to be younger, first-time mothers, without a partner, having  
40  
41 smoked during pregnancy, but they also had slightly higher IQ and longer education. The mothers  
42  
43 of the late preterm children were less likely to have consumed alcohol in pregnancy, but more likely  
44  
45 to have male births and lower IQ when compared to the other groups.  
46  
47  
48  
49

50  
51 With children born at term as the reference, the mean difference in FIQ, VIQ, and PIQ for the very  
52  
53 or moderately preterm group was -10.6 points [95% CI; -19.4 to -1.8], -7.4 points [-13.4 to -1.5],  
54  
55 and -11.7 points [-21.9 to -1.5], respectively, when adjusting for potential confounders. Among the  
56  
57 late preterm children, a tendency towards lower IQs was evident in the unadjusted analyses, but we  
58  
59  
60

1  
2  
3  
4 found no statistically significant differences after adjusting for potential confounders.

5  
6 For the attention measures, the mean differences were small, and we did not find evidence of  
7  
8 statistically significant associations.  
9

10  
11 With regard to executive function, no statistically significant findings were evident in the parents'  
12  
13 assessment. However, analyses of the teachers' assessment showed a mean difference in GEC, BRI,  
14  
15 and MI in the very or moderately preterm group of 5.3 points [95% CI; 2.4 to 8.3], 4.2 points [-0.6  
16  
17 to 9.0], and 5.5 points [2.0 to 9.0], respectively, when compared to the term group and adjusting for  
18  
19 potential confounders. For the late preterm group, the results were similar but did not reach  
20  
21 statistical significance (see table 2).  
22  
23

24  
25 In analyses with GA as a continuous variable (see table 3), we found a statistically significant  
26  
27 increase in FIQ of 0.08 points [95% CI; 0.01, 0.15] per increase in GA (in days) in the adjusted  
28  
29 analysis. Similar estimates were seen in the analyses of VIQ and PIQ. However, we found no  
30  
31 statistically significant associations in the adjusted analyses. For teacher-assessed executive  
32  
33 function, we found a statistically significant decrease in GEC and MI of -0.07 points [95% CI; -  
34  
35 0.14, -0.01] per increase in GA (in days) indicating better executive function with increasing GA,  
36  
37 however these estimates also became statistically non-significant when adjusting for potential  
38  
39 confounders.  
40  
41  
42  
43

44  
45 When maternal IQ and parental education were removed from the regression analyses separately or  
46  
47 simultaneously (see supplementary table 1), the estimates of association did not change notably.  
48  
49 However, when these variables were removed simultaneously from the regression, most estimates  
50  
51 became statistically non-significant due to wider CIs.  
52

53  
54 When introducing birthweight in the regression analyses (see supplementary table 1), the  
55  
56 association between GA and all IQ outcomes became considerably weaker and were no longer  
57  
58 statistically significant. However, a trend towards lower IQ in the very or moderately preterm group  
59  
60

1  
2  
3  
4 was still evident, as the mean differences in FIQ, VIQ, and PIQ were reduced to -7.0 points [95%  
5 CI; -15.7 to 1.6], -5.9 points [-12.2 to 0.3], and -6.8 points [-16.6 to 3.0], respectively, when  
6  
7 compared to the term group. When birthweight was introduced in the analyses of attention and  
8  
9 executive function outcomes, the results did not change substantially.  
10  
11  
12

13  
14 In a post hoc analysis, we excluded the early term births (GA 37-38) and made a direct comparison  
15  
16 between the very or moderately preterm group and the term group with GA  $\geq$  39 weeks ( $n=1443$ ),  
17  
18 and the late preterm group and the term group (GA  $\geq$  39 weeks), respectively (see supplementary  
19  
20 table 2). In these analyses, the results did not change notably for any of the outcomes.  
21  
22  
23

## 24 25 26 27 28 **DISCUSSION**

### 29 30 31 **Main findings**

32  
33  
34 We found a statistically significant effect of very or moderately preterm birth on IQ and teacher-  
35  
36 assessed executive function when adjusting for potential confounders. Although maternal IQ and  
37  
38 parental education accounted for much of the variance in child IQ in this dataset,<sup>7</sup> these two factors  
39  
40 should only be considered weak confounders with no significant association with GA, as removing  
41  
42 these variables from our analyses did not alter the associations notably. However, removal of the  
43  
44 variables produced wider CIs confirming that they explain substantial parts of the variance.  
45  
46

47  
48 The inclusion of birthweight in the regression analyses for IQ outcomes attenuated the associations  
49  
50 for the very or moderately preterm group, and the results were no longer statistically significant. For  
51  
52 the late preterm group, the associations completely vanished. This could be suggestive of mediation  
53  
54 and underlines the importance of looking at GA relatively to birthweight when investigating effects  
55  
56 of preterm birth, though our results for the very to moderately preterm children indicate that there  
57  
58  
59  
60

1  
2  
3  
4 may be cognitive effects of GA which are independent of birthweight, perhaps reflecting effects of  
5  
6 very low GA on brain development.  
7  
8

### 9 **Strengths and limitations**

10  
11  
12 One of the strengths of this study is the relatively large sample size with thorough information on  
13  
14 family and background factors that may influence the cognitive outcome of a child. Specially  
15  
16 trained psychologists, unaware of the gestational age, conducted neuropsychological tests with a  
17  
18 high interrater reliability of 97-97.5%.<sup>12</sup> To minimise bias in our analyses, we composed DAGs to  
19  
20 identify potential confounders prior to data analysis. Due to our large sample size, we were able to  
21  
22 adjust for an exhaustive set of confounders. Other strengths of our study were a predefined  
23  
24 protocolled methodology, and use of robust standard errors to account for the sample design and  
25  
26 shortcomings in the data.  
27  
28  
29

30  
31  
32 Our study has some limitations. The study population was sampled based on average alcohol  
33  
34 consumption and binge drinking during pregnancy,<sup>12 13</sup> and therefore, the sample is not  
35  
36 representative of the entire DNBC population. We applied sample weights in the analyses to  
37  
38 accommodate this. However, the use of weights may be problematic for small subgroups, and  
39  
40 together with the use of robust standard errors, this approach may have reduced the power to obtain  
41  
42 statistically significant results and widened the CIs. Generally, the effect estimates are subject to  
43  
44 some uncertainty illustrated by the wide CIs.<sup>24</sup>  
45  
46

47  
48 Another weakness of this study is the relatively small proportion of children born preterm,  
49  
50 especially children born very preterm (<32 weeks GA). According to MBR records from 2000 (our  
51  
52 recruitment period was from 1997 to 2003), we would expect 6.3% of all new-borns to be born  
53  
54 preterm.<sup>25</sup> In our population it was only 2.7%, which is equal to an underrepresentation of 57%.  
55  
56 Only 0.2% of our sample was born very preterm, although we would expect 1.0%.<sup>25</sup> This can be a  
57  
58  
59  
60



1  
2  
3  
4 result of various factors that prevent parents with children born preterm from participating in a  
5  
6 clinical study, in particular if the children are born very preterm and need special care.  
7

8  
9 However, studies have shown that the influence of selection bias on several exposure-outcome  
10  
11 associations in the DNBC is limited.<sup>26</sup> We adjusted for a large number of covariates associated with  
12  
13 selection, still we cannot rule out that the low prevalence of preterm births in our cohort may have  
14  
15 limited our power to detect any true differences as statistically significant. A post hoc power  
16  
17 analysis showed that analyses comparing very or moderately preterm birth ( $n=8$ ) with birth at term  
18  
19 ( $n=1728$ ) had a power of 0.48, 0.28, and 0.59 for FIQ, VIQ, and PIQ outcomes, respectively.  
20  
21

22  
23 The low prevalence of preterm births also prevented us from performing analyses investigating the  
24  
25 impact of very or extremely preterm birth.  
26

27  
28 Despite the limitations, especially the low number of preterm births, we believe that this study  
29  
30 contributes with important knowledge that together with existing evidence in the literature may  
31  
32 improve the clinicians' ability to advise women at risk of preterm delivery and give informed  
33  
34 predictions about the future.  
35

### 36 37 **Interpretation**

38  
39  
40 For the IQ outcomes, the findings in our study are generally in line with previous findings with an  
41  
42 IQ reduction of approximately 10 points in children born preterm.<sup>4 27</sup> However, in our study, this  
43  
44 clinically very relevant difference was only seen among the very or moderately preterm children,  
45  
46 and not in the late preterm group. A meta-analysis by Chan et al.<sup>28</sup> showed a statistically significant  
47  
48 impact of late preterm birth on general cognitive ability and non-verbal intelligence. Our study in  
49  
50 part contradicts these findings, as no associations between late preterm birth and IQ (full-scale,  
51  
52 verbal, and non-verbal) were found. In our unadjusted analyses, we saw a trend towards lower IQ  
53  
54 among late preterm children, but the trend disappeared when adjusting for confounders. This  
55  
56  
57  
58  
59  
60

1  
2  
3  
4 discrepancy may reflect insufficient adjustments in other studies but also the limited power of our  
5  
6 study.  
7  
8

9  
10 When assessing attention measures, we only found one statistically significant result, which might  
11  
12 be because of chance alone. This is not in line with previous findings suggesting that preterm  
13  
14 infants are at increased risk of developing eg Attention Deficit Hyperactivity Disorder with a  
15  
16 relative risk of 2.64 [95% CI 1.85, 3.78].<sup>27</sup> However, TEACH-5 has not been validated as a  
17  
18 diagnostic test, and given the unambiguous findings in the present study, it is possible that GA does  
19  
20 not have an impact on test of basic attention function.  
21  
22

23  
24 In the field of executive function, it has been suggested that extremely preterm infants (<28 weeks  
25  
26 GA) are at increased risk of developing executive function difficulties.<sup>29</sup> Studies investigating the  
27  
28 association between very, moderately, or late preterm birth and poor BRIEF scores have not  
29  
30 detected any convincing deficits when evaluating the parents' questionnaire,<sup>30 31</sup> and to our  
31  
32 knowledge, the teachers' questionnaire has not previously been used for this purpose. Hodel et al.  
33  
34 detected deficits in a population of moderately to late preterm infants at the age of 9 months and at  
35  
36 4 years,<sup>32</sup> but in these studies, other executive function measures than BRIEF were applied.  
37  
38

39  
40 In extremely low birthweight children, teachers have proven to report significantly more difficulties  
41  
42 on the BRI subscale compared to the parents.<sup>33</sup> In our study, we found that teachers reported more  
43  
44 difficulties in all areas (GEC, BRI, and MI) when compared to the parents. This can be due to  
45  
46 teachers having a more objective viewpoint and being more experienced in working with children  
47  
48 with and without difficulties.  
49  
50

## 51 52 53 54 55 56 **CONCLUSION** 57 58 59 60

1  
2  
3  
4 This study showed significantly lower IQ and poorer executive function in children born very or  
5 moderately preterm (<34 weeks GA) compared to children born at term ( $\geq 37$  weeks GA), but only  
6 the differences in IQ were considered clinically relevant. No associations between late preterm birth  
7 (34 to <37 weeks GA) and poor cognitive outcomes were shown.  
8  
9

10  
11  
12  
13 Maternal IQ and parental education are strong predictors of child IQ in our dataset but were only  
14 weak confounders of the association between GA and cognitive outcomes. Therefore, GA may play  
15 an important role in determining cognitive abilities independent of maternal IQ and parental  
16 educational level. Further studies with larger sample sizes to confirm these findings are needed.  
17  
18  
19  
20  
21  
22  
23  
24  
25

## 26 **Acknowledgements**

27  
28  
29 The authors would like to thank the participants for their participation in the study.  
30  
31  
32  
33  
34  
35

## 36 **Contributors**

37  
38  
39 Dr. Sejer contributed to the conception and design of the study, performed data management and  
40 statistical analyses, analysed and interpreted the data, drafted the initial manuscript, and wrote the  
41 final manuscript with contributions from the co-authors.  
42  
43  
44

45  
46 Miss Slavensky and Mr. Bruun contributed to the conception and design of the study, assisted with  
47 statistical analyses and interpretation of the data, and critically reviewed and revised the manuscript.  
48  
49

50  
51 Mr. Mortensen and Dr. Kesmodel conceptualised and designed the study, analysed and interpreted  
52 the data, and critically reviewed and revised the manuscript.  
53  
54

55 All authors approved the final manuscript as submitted and agree to be accountable for all aspects  
56 of the work.  
57  
58  
59  
60

1  
2  
3  
4  
5  
6  
7  
8  
9  
10  
11  
12  
13  
14  
15  
16  
17  
18  
19  
20  
21  
22  
23  
24  
25  
26  
27  
28  
29  
30  
31  
32  
33  
34  
35  
36  
37  
38  
39  
40  
41  
42  
43  
44  
45  
46  
47  
48  
49  
50  
51  
52  
53  
54  
55  
56  
57  
58  
59  
60

## **Funding**

This work was supported by a scholarship granted by the Novo Nordisk Foundation. The LDPS was supported primarily by Centers for Disease Control and Prevention, Atlanta, Georgia, USA, and also from the Danish National Board of Health, the Lundbeck Foundation, Ludvig & Sara Elsass' Foundation, the Augustinus Foundation, and Aase & Ejnar Danielsen's Foundation. The Danish National Research Foundation established the Danish Epidemiology Science Center that initiated and created the DNBC. Besides a major grant from this Foundation, additional support for the DNBC was obtained from the Pharmacy Foundation, the Egmont Foundation, the March of Dimes Birth Defects Foundation, the Augustinus Foundation, and the Health Foundation.

## **Competing interests**

None declared.

## **Data sharing statement**

No additional data are available for this study.

## References

1. Langhoff-Roos J, Kesmodel U, Jacobsson B, et al. Spontaneous preterm delivery in primiparous women at low risk in Denmark: population based study. *BMJ* 2006;332(7547):937-9. doi: 10.1136/bmj.38751.524132.2F
2. Wilson-Costello D, Friedman H, Minich N, et al. Improved survival rates with increased neurodevelopmental disability for extremely low birth weight infants in the 1990s. *Pediatrics* 2005;115(4):997-1003. doi: 10.1542/peds.2004-0221
3. Saigal S, Doyle LW. An overview of mortality and sequelae of preterm birth from infancy to adulthood. *Lancet* 2008;371(9608):261-9. doi: 10.1016/S0140-6736(08)60136-1
4. Kerr-Wilson CO, Mackay DF, Smith GC, et al. Meta-analysis of the association between preterm delivery and intelligence. *J Public Health (Oxf)* 2012;34(2):209-16. doi: 10.1093/pubmed/fdr024
5. Larroque B, Ancel PY, Marret S, et al. Neurodevelopmental disabilities and special care of 5-year-old children born before 33 weeks of gestation (the EPIPAGE study): a longitudinal cohort study. *Lancet* 2008;371(9615):813-20. doi: 10.1016/S0140-6736(08)60380-3
6. Aarnoudse-Moens CS, Weisglas-Kuperus N, van Goudoever JB, et al. Meta-analysis of neurobehavioral outcomes in very preterm and/or very low birth weight children. *Pediatrics* 2009;124(2):717-28. doi: 10.1542/peds.2008-2816
7. Eriksen HL, Kesmodel US, Underbjerg M, et al. Predictors of intelligence at the age of 5: family, pregnancy and birth characteristics, postnatal influences, and postnatal growth. *PLoS One* 2013;8(11):e79200. doi: 10.1371/journal.pone.0079200
8. Lean RE, Paul RA, Smyser CD, et al. Maternal intelligence quotient (IQ) predicts IQ and language in very preterm children at age 5 years. *J Child Psychol Psychiatry* 2018;59(2):150-59. doi: 10.1111/jcpp.12810
9. Kirkegaard I, Obel C, Hedegaard M, et al. Gestational age and birth weight in relation to school performance of 10-year-old children: a follow-up study of children born after 32 completed weeks. *Pediatrics* 2006;118(4):1600-6. doi: 10.1542/peds.2005-2700
10. Larroque B, Ancel PY, Marchand-Martin L, et al. Special care and school difficulties in 8-year-old very preterm children: the Epipage cohort study. *PLoS One* 2011;6(7):e21361. doi: 10.1371/journal.pone.0021361

1  
2  
3  
4  
5  
6  
7  
8  
9  
10  
11  
12  
13  
14  
15  
16  
17  
18  
19  
20  
21  
22  
23  
24  
25  
26  
27  
28  
29  
30  
31  
32  
33  
34  
35  
36  
37  
38  
39  
40  
41  
42  
43  
44  
45  
46  
47  
48  
49  
50  
51  
52  
53  
54  
55  
56  
57  
58  
59  
60

11. Talge NM, Holzman C, Wang J, et al. Late-preterm birth and its association with cognitive and socioemotional outcomes at 6 years of age. *Pediatrics* 2010;126(6):1124-31. doi: 10.1542/peds.2010-1536
12. Kesmodel US, Underbjerg M, Kilburn TR, et al. Lifestyle during pregnancy: neurodevelopmental effects at 5 years of age. The design and implementation of a prospective follow-up study. *Scand J Public Health* 2010;38(2):208-19. doi: 10.1177/1403494809357093
13. Kesmodel US, Eriksen HL, Underbjerg M, et al. The effect of alcohol binge drinking in early pregnancy on general intelligence in children. *BJOG* 2012;119(10):1222-31. doi: 10.1111/j.1471-0528.2012.03395.x
14. Wechsler D. Manual for the Wechsler Preschool and Primary Scale of Intelligence-Revised. Swedish version. Stockholm: Psykologiförlaget AB 1999.
15. Underbjerg M, Kesmodel US, Landro NI, et al. The effects of low to moderate alcohol consumption and binge drinking in early pregnancy on selective and sustained attention in 5-year-old children. *BJOG* 2012;119(10):1211-21. doi: 10.1111/j.1471-0528.2012.03396.x
16. Gioia GA, Isquith PK, Guy SC, et al. TEST REVIEW Behavior Rating Inventory of Executive Function. *Child Neuropsychol* 2000;6(3):235-38.
17. Greenland S, Pearl J, Robins JM. Causal diagrams for epidemiologic research. *Epidemiology* 1999;10(1):37-48.
18. Textor J, Hardt J, Knuppel S. DAGitty: a graphical tool for analyzing causal diagrams. *Epidemiology* 2011;22(5):745. doi: 10.1097/EDE.0b013e318225c2be
19. Raven J, Court J, Raven J. Manual for Raven's Progressive Matrices and Vocabulary Scales. Oxford: Oxford Psychologists Press 1998.
20. Wechsler D. Manual for the Wechsler Adult Intelligence Scale. New York, NY: The Psychological Corporation 1955.
21. Marsal K, Persson PH, Larsen T, et al. Intrauterine growth curves based on ultrasonically estimated foetal weights. *Acta Paediatr* 1996;85(7):843-8.
22. Kesmodel US, Bertrand J, Stovring H, et al. The effect of different alcohol drinking patterns in early to mid pregnancy on the child's intelligence, attention, and executive function. *BJOG* 2012;119(10):1180-90. doi: 10.1111/j.1471-0528.2012.03393.x
23. Huber PJ. The behavior of maximum likelihood estimates under nonstandard conditions. *Proceedings of the Fifth Berkeley Symposium on Mathematical Statistics and Probability* 1967;1:221-33.

- 1  
2  
3  
4 24. Greenland S, Senn SJ, Rothman KJ, et al. Statistical tests, P values, confidence intervals, and  
5 power: a guide to misinterpretations. *Eur J Epidemiol* 2016;31(4):337-50. doi: 10.1007/s10654-  
6 016-0149-3  
7  
8  
9 25. Sundhedsstyrelsen. Fødselsregisteret 1997-2001. Nye tal fra Sundhedsstyrelsen. Årgang 7. Nr.  
10 12, 2003.  
11  
12 26. Nohr EA, Liew Z. How to investigate and adjust for selection bias in cohort studies. *Acta Obstet*  
13 *Gynecol Scand* 2018;97(4):407-16. doi: 10.1111/aogs.13319  
14  
15 27. Bhutta AT, Cleves MA, Casey PH, et al. Cognitive and behavioral outcomes of school-aged  
16 children who were born preterm: a meta-analysis. *JAMA* 2002;288(6):728-37.  
17  
18 28. Chan E, Leong P, Malouf R, et al. Long-term cognitive and school outcomes of late-preterm  
19 and early-term births: a systematic review. *Child Care Health Dev* 2016;42(3):297-312. doi:  
20 10.1111/cch.12320  
21  
22 29. Joseph RM, O'Shea TM, Allred EN, et al. Neurocognitive and Academic Outcomes at Age 10  
23 Years of Extremely Preterm Newborns. *Pediatrics* 2016;137(4) doi: 10.1542/peds.2015-4343  
24  
25 30. Brumbaugh JE, Hodel AS, Thomas KM. The impact of late preterm birth on executive function  
26 at preschool age. *Am J Perinatol* 2014;31(4):305-14. doi: 10.1055/s-0033-1348950  
27  
28 31. Ritter BC, Perrig W, Steinlin M, et al. Cognitive and behavioral aspects of executive functions  
29 in children born very preterm. *Child Neuropsychol* 2014;20(2):129-44. doi:  
30 10.1080/09297049.2013.773968  
31  
32 32. Hodel AS, Brumbaugh JE, Morris AR, et al. Hot executive function following moderate-to-late  
33 preterm birth: altered delay discounting at 4 years of age. *Dev Sci* 2016;19(2):221-34. doi:  
34 10.1111/desc.12307  
35  
36 33. McCann JP, Rider GN, Weiss BA, et al. Latent mean comparisons on the BRIEF in preterm  
37 children: parent and teacher differences. *Child Neuropsychol* 2014;20(6):737-51. doi:  
38 10.1080/09297049.2013.859663  
39  
40  
41  
42  
43  
44  
45  
46  
47  
48  
49  
50  
51  
52  
53  
54  
55  
56  
57  
58  
59  
60

## Tables

**Table 1.** Family characteristics among singletons born at term or preterm. Denmark 2003-2008 (*n*=1776)

| Characteristics                                                                                | Born at term<br>(≥37 weeks) | Late preterm<br>birth<br>(34 to <37 weeks) | Moderately or very<br>preterm birth<br>(<34 weeks) <sup>a</sup> |
|------------------------------------------------------------------------------------------------|-----------------------------|--------------------------------------------|-----------------------------------------------------------------|
| <b>Number of infants (n)</b>                                                                   | 1728                        | 40                                         | 8                                                               |
| <b>Maternal age</b> (years, mean [SD])                                                         | 30.8 (4.4)                  | 30.4 (4.5)                                 | 28.8 (3.4)                                                      |
| <b>Maternal pre-pregnancy BMI</b> (kg/m <sup>2</sup> , median [10/90 percentile]) <sup>b</sup> | 22.6 (19.6/28.7)            | 22.7 (18.4/33.0)                           | 22.8 (16.5/28.2)                                                |
| <b>Maternal smoking in pregnancy</b> (%)                                                       | 31.7                        | 30.0                                       | 37.5                                                            |
| <b>Maternal alcohol consumption in pregnancy</b> (%) <sup>c</sup>                              |                             |                                            |                                                                 |
| 0 drinks/week                                                                                  | 47.6                        | 55.0                                       | 50.0                                                            |
| 1-4 drinks/week                                                                                | 41.3                        | 37.5                                       | 37.5                                                            |
| 5+ drinks/week <sup>d</sup>                                                                    | 11.1                        | 7.5                                        | 12.5                                                            |
| <b>Maternal marital status</b> (%) <sup>e</sup>                                                |                             |                                            |                                                                 |
| Single <sup>f</sup>                                                                            | 12.4                        | 10.3                                       | 25.0                                                            |
| Cohabiting                                                                                     | 87.6                        | 89.7                                       | 75.0                                                            |
| <b>Maternal IQ</b> (mean [SD]) <sup>g</sup>                                                    | 100.0 (14.9)                | 97.7 (16.9)                                | 104.3 (17.9)                                                    |
| <b>Parental educational level</b> (years, mean [SD]) <sup>h</sup>                              | 13.2 (1.9)                  | 13.0 (1.6)                                 | 14.2 (1.8)                                                      |
| <b>Parity</b> (%)                                                                              |                             |                                            |                                                                 |
| 0                                                                                              | 50.7                        | 60.0                                       | 87.5                                                            |
| 1                                                                                              | 32.1                        | 30.0                                       | 12.5                                                            |
| 2+                                                                                             | 17.2                        | 10.0                                       | 0.0                                                             |
| <b>Child sex</b> (%)                                                                           |                             |                                            |                                                                 |
| Male                                                                                           | 51.7                        | 60.0                                       | 50.0                                                            |
| Females                                                                                        | 48.3                        | 40.0                                       | 50.0                                                            |
| <b>Gestational age</b> (days, median [10/90 percentile])                                       | 282.0<br>(269.0/293.0)      | 251.5<br>(241.0/257.5)                     | 227.5<br>(206.0/236.0)                                          |
| <b>Birthweight</b> (grams, mean [SD]) <sup>i</sup>                                             | 3627.3 (483.4)              | 2740.8 (482.6)                             | 2040.9 (458.4)                                                  |
| <b>Child age at testing</b> (years, median [10/90 percentile])                                 | 5.23 (5.12/5.30)            | 5.26 (5.13/5.31)                           | 5.23 (5.10/5.29)                                                |

N, number; SD, standard deviation; BMI, body mass index; IQ, intelligence quotient. <sup>a</sup> Lowest observation 29 weeks. <sup>b</sup> Information missing for 35 term and 1 late preterm birth. <sup>c</sup> Information missing for 1 term birth. <sup>d</sup> Range 5-14 drinks/week. <sup>e</sup> Information missing for 13 term and 1 late preterm birth. <sup>f</sup> If reported being single either during pregnancy or at follow-up at 60-64 months postpartum. <sup>g</sup> Information missing for 9 term births. <sup>h</sup> Information missing for 5 term and 1 late preterm birth. <sup>i</sup> Information missing for 12 term and 2 late preterm births.



**Table 2.** Mean differences in intelligence, attention, and executive function between 5-year-old children born at term (reference group) and children born preterm. Denmark 2003-2008 ( $n=1776$ )<sup>a</sup>

|                                               | Born at term $\geq 37$<br>weeks ( $n=1728$ ) | Late preterm birth 34 to $<37$<br>weeks ( $n=40$ ) | Moderately or very preterm<br>birth $<34$ weeks ( $n=8$ ) |                    |               |
|-----------------------------------------------|----------------------------------------------|----------------------------------------------------|-----------------------------------------------------------|--------------------|---------------|
|                                               | Mean (SD)                                    | Mean<br>difference                                 | 95% CI                                                    | Mean<br>difference | 95% CI        |
| <b>Intelligence (WPPSI-R)</b>                 |                                              |                                                    |                                                           |                    |               |
| <b>Full scale IQ</b>                          |                                              |                                                    |                                                           |                    |               |
| Unadjusted                                    | 105.64 (12.86)                               | -2.09                                              | -6.91, 2.74                                               | -9.22              | -20.25, 1.81  |
| Adjusted <sup>b</sup>                         |                                              | -0.05                                              | -4.62, 4.53                                               | -10.56             | -19.37, -1.75 |
| <b>Verbal IQ</b>                              |                                              |                                                    |                                                           |                    |               |
| Unadjusted                                    | 104.81 (10.80)                               | -1.73                                              | -5.23, 1.76                                               | -7.11              | -15.64, 1.41  |
| Adjusted                                      |                                              | -0.40                                              | -4.84, 4.05                                               | -7.41              | -13.37, -1.45 |
| <b>Performance IQ</b>                         |                                              |                                                    |                                                           |                    |               |
| Unadjusted                                    | 105.14 (16.22)                               | -2.00                                              | -9.02, 5.03                                               | -9.51              | -20.46, 1.45  |
| Adjusted                                      |                                              | 0.38                                               | -5.39, 6.15                                               | -11.71             | -21.89, -1.52 |
| <b>Attention (TEACH-5)</b>                    |                                              |                                                    |                                                           |                    |               |
| <b>Overall attention</b>                      |                                              |                                                    |                                                           |                    |               |
| Unadjusted                                    | 0.01 (1.00)                                  | -0.21                                              | -0.70, 0.28                                               | -0.10              | -0.72, 0.52   |
| Adjusted                                      |                                              | -0.16                                              | -0.59, 0.26                                               | -0.25              | -1.00, 0.50   |
| <b>Sustained attention</b>                    |                                              |                                                    |                                                           |                    |               |
| Unadjusted                                    | 0.01 (1.00)                                  | -0.39                                              | -0.76, -0.01                                              | -0.09              | -0.62, 0.44   |
| Adjusted                                      |                                              | -0.23                                              | -0.64, 0.19                                               | -0.16              | -0.83, 0.52   |
| <b>Selective attention</b>                    |                                              |                                                    |                                                           |                    |               |
| Unadjusted                                    | 0.00 (1.00)                                  | 0.09                                               | -0.46, 0.63                                               | 0.02               | -0.41, 0.45   |
| Adjusted                                      |                                              | 0.06                                               | -0.42, 0.53                                               | -0.19              | -0.65, 0.27   |
| <b>Executive function (BRIEF)<sup>c</sup></b> |                                              |                                                    |                                                           |                    |               |
| <b>- Parent version</b>                       |                                              |                                                    |                                                           |                    |               |
| <b>Global Executive Composite</b>             |                                              |                                                    |                                                           |                    |               |
| Unadjusted                                    | 49.97 (9.98)                                 | 1.44                                               | -4.03, 6.90                                               | -0.39              | -16.52, 15.74 |
| Adjusted                                      |                                              | 2.26                                               | -2.01, 6.53                                               | -0.20              | -14.27, 13.87 |
| <b>Behavioural Regulation Index</b>           |                                              |                                                    |                                                           |                    |               |
| Unadjusted                                    | 50.01 (9.98)                                 | -0.35                                              | -5.50, 4.79                                               | -1.18              | -16.17, 13.81 |
| Adjusted                                      |                                              | 0.40                                               | -3.97, 4.76                                               | -1.95              | -14.87, 10.97 |
| <b>Metacognition Index</b>                    |                                              |                                                    |                                                           |                    |               |
| Unadjusted                                    | 49.95 (9.98)                                 | 2.41                                               | -3.10, 7.92                                               | 0.13               | -15.24, 15.51 |
| Adjusted                                      |                                              | 3.19                                               | -1.11, 7.49                                               | 0.90               | -12.60, 14.41 |
| <b>- Teacher version</b>                      |                                              |                                                    |                                                           |                    |               |
| <b>Global Executive Composite</b>             |                                              |                                                    |                                                           |                    |               |
| Unadjusted                                    | 49.94 (10.03)                                | 4.47                                               | -0.77, 9.70                                               | 5.47               | 2.57, 8.36    |
| Adjusted                                      |                                              | 3.99                                               | -0.82, 8.81                                               | 5.33               | 2.39, 8.27    |
| <b>Behavioural Regulation Index</b>           |                                              |                                                    |                                                           |                    |               |
| Unadjusted                                    | 49.95 (10.01)                                | 4.42                                               | -0.38, 9.21                                               | 5.29               | 2.08, 8.50    |
| Adjusted                                      |                                              | 3.79                                               | -0.89, 8.48                                               | 4.24               | -0.56, 9.03   |
| <b>Metacognition Index</b>                    |                                              |                                                    |                                                           |                    |               |
| Unadjusted                                    | 49.95 (10.03)                                | 4.09                                               | -1.55, 9.73                                               | 5.07               | 0.61, 9.54    |
| Adjusted                                      |                                              | 3.77                                               | -1.32, 8.85                                               | 5.46               | 1.97, 8.95    |

1  
2  
3  
4  
5  
6 N, number; SD, standard deviation; CI, confidence interval; WPPSI-R, Wechsler Preschool and Primary Scales of  
7 Intelligence-Revised; IQ, intelligence quotient; TEACH-5, Test of Everyday Attention for Children at Five; BRIEF,  
8 Behaviour Rating Inventory of Executive Function. <sup>a</sup> Overall number of participants. Due to complete case analyses, for  
9 the adjusted analyses, the actual number of participants for each outcome was: Full-scale IQ ( $n=1748$  [missing data for  
10 1 late preterm birth]), verbal IQ ( $n=1749$  [missing data for 1 late preterm birth]), performance IQ ( $n=1749$  [missing  
11 data for 1 late preterm birth]), overall attention ( $n=1493$  [missing data for 7 late preterm births]), sustained attention  
12 ( $n=1586$  [missing data for 4 late preterm births]), selective attention ( $n=1612$  [missing data for 4 late preterm births]),  
13 Global Executive Composite (parents,  $n=1748$  [missing data for 1 late preterm birth]; teachers,  $n=1525$  [missing data  
14 for 7 late preterm births and 1 very to moderate preterm birth]), Behavioural Regulation Index (parents,  $n=1748$   
15 [missing data for 1 late preterm birth]; teachers,  $n=1530$  [missing data for 7 late preterm births and 1 very to  
16 moderate preterm birth]), Metacognition Index (parents,  $n=1748$  [missing data for 1 late preterm birth]; teachers,  
17  $n=1525$  [missing data for 7 late preterm births and 1 very to moderate preterm birth]). <sup>b</sup> All adjusted analyses adjusted  
18 for maternal age, maternal IQ, average alcohol consumption in pregnancy, smoking in pregnancy, parity, maternal  
19 marital status, parental educational level, child sex, testing psychologist, and age at testing. <sup>c</sup> A higher BRIEF score  
20 indicates more executive function difficulties (opposite than the other outcome measures).  
21  
22  
23  
24  
25  
26  
27  
28  
29  
30  
31  
32  
33  
34  
35  
36  
37  
38  
39  
40  
41  
42  
43  
44  
45  
46  
47  
48  
49  
50  
51  
52  
53  
54  
55  
56  
57  
58  
59  
60

**Table 3.** Regression coefficients for the association between gestational age (in days) and intelligence, attention, and executive function in 5-year-old children. Denmark 2003-2008 ( $n=1776$ )<sup>a</sup>

| Intelligence (WPPSI-R) | Beta (95% CI)      | Attention (TEACH-5)        | Beta (95% CI)      | Executive function (BRIEF) <sup>c</sup> - Parent version | Beta (95% CI)       | Executive function (BRIEF) - Teacher version | Beta (95% CI)        |
|------------------------|--------------------|----------------------------|--------------------|----------------------------------------------------------|---------------------|----------------------------------------------|----------------------|
| <b>Full scale IQ</b>   |                    | <b>Overall attention</b>   |                    | <b>Global Executive Composite</b>                        |                     | <b>Global Executive Composite</b>            |                      |
| Unadjusted             | 0.10 (0.02, 0.19)  | Unadjusted                 | 0.00 (0.00, 0.01)  | Unadjusted                                               | -0.03 (-0.10, 0.05) | Unadjusted                                   | -0.07 (-0.14, -0.01) |
| Adjusted <sup>b</sup>  | 0.08 (0.01, 0.15)  | Adjusted                   | 0.00 (0.00, 0.01)  | Adjusted                                                 | -0.02 (-0.08, 0.05) | Adjusted                                     | -0.06 (-0.12, 0.01)  |
| <b>Verbal IQ</b>       |                    | <b>Sustained attention</b> |                    | <b>Behavioural Regulation Index</b>                      |                     | <b>Behavioural Regulation Index</b>          |                      |
| Unadjusted             | 0.07 (0.00, 0.14)  | Unadjusted                 | 0.00 (-0.01, 0.01) | Unadjusted                                               | -0.02 (-0.09, 0.05) | Unadjusted                                   | -0.06 (-0.13, 0.01)  |
| Adjusted               | 0.06 (0.00, 0.13)  | Adjusted                   | 0.00 (-0.01, 0.01) | Adjusted                                                 | -0.01 (-0.08, 0.05) | Adjusted                                     | -0.04 (-0.11, 0.02)  |
| <b>Performance IQ</b>  |                    | <b>Selective attention</b> |                    | <b>Metacognition Index</b>                               |                     | <b>Metacognition Index</b>                   |                      |
| Unadjusted             | 0.12 (0.01, 0.22)  | Unadjusted                 | 0.00 (0.00, 0.01)  | Unadjusted                                               | -0.03 (-0.10, 0.05) | Unadjusted                                   | -0.07 (-0.14, -0.01) |
| Adjusted               | 0.08 (-0.01, 0.18) | Adjusted                   | 0.00 (0.00, 0.01)  | Adjusted                                                 | -0.02 (-0.08, 0.04) | Adjusted                                     | -0.06 (-0.12, 0.00)  |

N, number; CI, confidence interval; WPPSI-R, Wechsler Preschool and Primary Scales of Intelligence-Revised; IQ, intelligence quotient; TEACH-5, Test of Everyday Attention for Children at Five; BRIEF, Behaviour Rating Inventory of Executive Function. <sup>a</sup>Overall number of participants. Due to complete case analyses, for the adjusted analyses, the actual number of participants for each outcome was: Full-scale IQ ( $n=1748$  [missing data for 1 late preterm birth]), verbal IQ ( $n=1749$  [missing data for 1 late preterm birth]), performance IQ ( $n=1749$  [missing data for 1 late preterm birth]), overall attention ( $n=1493$  [missing data for 7 late preterm births]), sustained attention ( $n=1586$  [missing data for 4 late preterm births]), selective attention ( $n=1612$  [missing data for 4 late preterm births]), Global Executive Composite (parents,  $n=1748$  [missing data for 1 late preterm birth]; teachers,  $n=1525$  [missing data for 7 late preterm births and 1 very to moderate preterm birth]), Behavioural Regulation Index (parents,  $n=1748$  [missing data for 1 late preterm birth]; teachers,  $n=1530$  [missing data for 7 late preterm births and 1 very to moderate preterm birth]), Metacognition Index (parents,  $n=1748$  [missing data for 1 late preterm birth]; teachers,  $n=1525$  [missing data for 7 late preterm births and 1 very to moderate preterm birth]). <sup>b</sup>All adjusted analyses adjusted for maternal age, maternal IQ, average alcohol consumption in pregnancy, smoking in pregnancy, parity, maternal marital status, parental educational level, child sex, testing psychologist, and age at testing. <sup>c</sup>A higher BRIEF score reflects more executive function difficulties (opposite than the other outcome measures).

**Supplementary table 1.** Mean differences in intelligence, attention, and executive functions between 5-year-old children born at term (reference group) and children born preterm. Denmark 2003-2008 ( $n=1776$ )

|                                             | Born at term $\geq 37$<br>weeks ( $n=1728$ ) | Late preterm birth 34 to $<37$<br>weeks ( $n=40$ ) | Moderately or very preterm<br>birth $<34$ weeks ( $n=8$ ) |                    |               |
|---------------------------------------------|----------------------------------------------|----------------------------------------------------|-----------------------------------------------------------|--------------------|---------------|
|                                             | Mean (SD)                                    | Mean<br>difference                                 | 95% CI                                                    | Mean<br>difference | 95% CI        |
| <b>Intelligence (WPPSI-R)</b>               |                                              |                                                    |                                                           |                    |               |
| <b>Full scale IQ</b>                        |                                              |                                                    |                                                           |                    |               |
| Unadjusted                                  | 105.64 (12.86)                               | -2.09                                              | -6.91, 2.74                                               | -9.22              | -20.25, 1.81  |
| Adjusted <sup>a</sup>                       |                                              | -0.05                                              | -4.62, 4.53                                               | -10.56             | -19.37, -1.75 |
| Excluding maternal IQ <sup>b</sup>          |                                              | -0.00                                              | -4.91, 4.91                                               | -11.23             | -21.00, -1.45 |
| Excluding parental education                |                                              | -0.64                                              | -5.16, 3.87                                               | -10.04             | -19.60, -0.48 |
| Excluding IQ + parental education           |                                              | -1.42                                              | -6.47, 3.63                                               | -10.34             | -22.19, 1.51  |
| With all including birthweight <sup>c</sup> |                                              | 2.21                                               | -2.82, 7.25                                               | -7.04              | -15.67, 1.59  |
| <b>Verbal IQ</b>                            |                                              |                                                    |                                                           |                    |               |
| Unadjusted                                  | 104.81 (10.80)                               | -1.73                                              | -5.23, 1.76                                               | -7.11              | -15.64, 1.41  |
| Adjusted                                    |                                              | -0.40                                              | -4.84, 4.05                                               | -7.41              | -13.37, -1.45 |
| Excluding maternal IQ                       |                                              | -0.33                                              | -4.48, 3.83                                               | -7.86              | -14.89, -0.83 |
| Excluding parental education                |                                              | -0.98                                              | -5.40, 3.44                                               | -6.89              | -13.14, -0.64 |
| Excluding IQ + parental education           |                                              | -1.53                                              | -5.55, 2.49                                               | -7.10              | -15.24, 1.05  |
| With all including birthweight              |                                              | 0.59                                               | -4.22, 5.40                                               | -5.93              | -12.19, 0.33  |
| <b>Performance IQ</b>                       |                                              |                                                    |                                                           |                    |               |
| Unadjusted                                  | 105.14 (16.22)                               | -2.00                                              | -9.02, 5.03                                               | -9.51              | -20.46, 1.45  |
| Adjusted                                    |                                              | 0.38                                               | -5.39, 6.15                                               | -11.71             | -21.89, -1.52 |
| Excluding maternal IQ                       |                                              | 0.42                                               | -6.23, 7.07                                               | -12.46             | -23.38, -1.54 |
| Excluding parental education                |                                              | -0.12                                              | -5.82, 5.59                                               | -11.28             | -22.20, -0.36 |
| Excluding IQ + parental education           |                                              | -0.93                                              | -7.85, 5.99                                               | -11.63             | -24.73, 1.47  |
| With all including birthweight              |                                              | 3.49                                               | -2.78, 9.76                                               | -6.80              | -16.60, 3.00  |
| <b>Attention (Teach-5)</b>                  |                                              |                                                    |                                                           |                    |               |
| <b>Overall attention</b>                    |                                              |                                                    |                                                           |                    |               |
| Unadjusted                                  | 0.01 (1.00)                                  | -0.21                                              | -0.70, 0.28                                               | -0.10              | -0.72, 0.52   |
| Adjusted                                    |                                              | -0.16                                              | -0.59, 0.26                                               | -0.25              | -1.00, 0.50   |
| Excluding maternal IQ                       |                                              | -0.15                                              | -0.59, 0.30                                               | -0.28              | -1.05, 0.49   |
| Excluding parental education                |                                              | -0.21                                              | -0.63, 0.22                                               | -0.22              | -0.88, 0.44   |
| Excluding IQ + parental education           |                                              | -0.21                                              | -0.67, 0.25                                               | -0.25              | -0.90, 0.40   |
| With all including birthweight              |                                              | -0.11                                              | -0.56, 0.34                                               | -0.20              | -0.98, 0.59   |
| <b>Sustained attention</b>                  |                                              |                                                    |                                                           |                    |               |
| Unadjusted                                  | 0.01 (1.00)                                  | -0.39                                              | -0.76, -0.01                                              | -0.09              | -0.62, 0.44   |
| Adjusted                                    |                                              | -0.23                                              | -0.64, 0.19                                               | -0.16              | -0.83, 0.52   |
| Excluding maternal IQ                       |                                              | -0.23                                              | -0.64, 0.18                                               | -0.17              | -0.86, 0.52   |
| Excluding parental education                |                                              | -0.25                                              | -0.66, 0.16                                               | -0.13              | -0.75, 0.48   |
| Excluding IQ + parental education           |                                              | -0.27                                              | -0.68, 0.13                                               | -0.15              | -0.75, 0.46   |
| With all including birthweight              |                                              | -0.10                                              | -0.55, 0.35                                               | 0.01               | -0.72, 0.73   |
| <b>Selective attention</b>                  |                                              |                                                    |                                                           |                    |               |
| Unadjusted                                  | 0.00 (1.00)                                  | 0.09                                               | -0.46, 0.63                                               | 0.02               | -0.41, 0.45   |
| Adjusted                                    |                                              | 0.06                                               | -0.42, 0.53                                               | -0.19              | -0.65, 0.27   |
| Excluding maternal IQ                       |                                              | 0.07                                               | -0.41, 0.56                                               | -0.20              | -0.69, 0.29   |
| Excluding parental education                |                                              | 0.03                                               | -0.45, 0.51                                               | -0.16              | -0.56, 0.24   |
| Excluding IQ + parental education           |                                              | 0.03                                               | -0.47, 0.53                                               | -0.17              | -0.57, 0.23   |
| With all including birthweight              |                                              | 0.00                                               | -0.50, 0.50                                               | -0.31              | -0.80, 0.18   |

**Executive functions (BRIEF)<sup>d</sup>****- Parent version****Global Executive Composite**

|                                   |              |      |             |       |               |
|-----------------------------------|--------------|------|-------------|-------|---------------|
| Unadjusted                        | 49.97 (9.98) | 1.44 | -4.03, 6.90 | -0.39 | -16.52, 15.74 |
| Adjusted                          |              | 2.26 | -2.01, 6.53 | -0.20 | -14.27, 13.87 |
| Excluding maternal IQ             |              | 2.23 | -2.15, 6.62 | -0.13 | -14.00, 13.73 |
| Excluding parental education      |              | 2.67 | -1.65, 7.00 | -0.58 | -15.69, 14.54 |
| Excluding IQ + parental education |              | 2.85 | -1.77, 7.47 | -0.54 | -15.79, 14.71 |
| With all including birthweight    |              | 1.62 | -2.96, 6.20 | -1.13 | -15.16, 12.90 |

**Behavioural Regulation Index**

|                                   |              |       |             |       |               |
|-----------------------------------|--------------|-------|-------------|-------|---------------|
| Unadjusted                        | 50.01 (9.98) | -0.35 | -5.50, 4.79 | -1.18 | -16.17, 13.81 |
| Adjusted                          |              | 0.40  | -3.97, 4.76 | -1.95 | -14.87, 10.97 |
| Excluding maternal IQ             |              | 0.37  | -4.06, 4.80 | -1.84 | -14.55, 10.87 |
| Excluding parental education      |              | 0.75  | -3.68, 5.18 | -2.27 | -16.08, 11.54 |
| Excluding IQ + parental education |              | 0.93  | -3.67, 5.54 | -2.21 | -16.17, 11.75 |
| With all including birthweight    |              | -0.27 | -4.92, 4.38 | -3.03 | -15.90, 9.85  |

**Metacognition Index**

|                                   |              |      |             |      |               |
|-----------------------------------|--------------|------|-------------|------|---------------|
| Unadjusted                        | 49.95 (9.98) | 2.41 | -3.10, 7.92 | 0.13 | -15.24, 15.51 |
| Adjusted                          |              | 3.19 | -1.11, 7.49 | 0.90 | -12.60, 14.41 |
| Excluding maternal IQ             |              | 3.17 | -1.24, 7.58 | 0.94 | -12.40, 14.27 |
| Excluding parental education      |              | 3.61 | -0.73, 7.95 | 0.52 | -14.03, 15.07 |
| Excluding IQ + parental education |              | 3.77 | -0.87, 8.40 | 0.54 | -14.11, 15.20 |
| With all including birthweight    |              | 2.63 | -2.01, 7.27 | 0.15 | -13.37, 13.66 |

**- Teacher version****Global Executive Composite**

|                                   |               |      |             |      |            |
|-----------------------------------|---------------|------|-------------|------|------------|
| Unadjusted                        | 49.94 (10.03) | 4.47 | -0.77, 9.70 | 5.47 | 2.57, 8.36 |
| Adjusted                          |               | 3.99 | -0.82, 8.81 | 5.33 | 2.39, 8.27 |
| Excluding maternal IQ             |               | 4.08 | -0.85, 9.02 | 5.56 | 2.55, 8.56 |
| Excluding parental education      |               | 4.06 | -0.74, 8.87 | 5.23 | 2.23, 8.23 |
| Excluding IQ + parental education |               | 4.30 | -0.67, 9.27 | 5.40 | 2.17, 8.62 |
| With all including birthweight    |               | 4.20 | -1.02, 9.42 | 5.39 | 1.67, 9.12 |

**Behavioural Regulation Index**

|                                   |               |      |             |      |              |
|-----------------------------------|---------------|------|-------------|------|--------------|
| Unadjusted                        | 49.95 (10.01) | 4.42 | -0.38, 9.21 | 5.29 | 2.08, 8.50   |
| Adjusted                          |               | 3.79 | -0.89, 8.48 | 4.24 | -0.56, 9.03  |
| Excluding maternal IQ             |               | 3.89 | -0.91, 8.70 | 4.49 | -0.26, 9.24  |
| Excluding parental education      |               | 3.81 | -0.87, 8.49 | 4.21 | -0.62, 9.05  |
| Excluding IQ + parental education |               | 4.04 | -0.78, 8.85 | 4.38 | -0.71, 9.47  |
| With all including birthweight    |               | 4.44 | -0.63, 9.52 | 4.81 | -0.72, 10.34 |

**Metacognition Index**

|                                   |               |      |             |      |            |
|-----------------------------------|---------------|------|-------------|------|------------|
| Unadjusted                        | 49.95 (10.03) | 4.09 | -1.55, 9.73 | 5.07 | 0.61, 9.54 |
| Adjusted                          |               | 3.77 | -1.32, 8.85 | 5.46 | 1.97, 8.95 |
| Excluding maternal IQ             |               | 3.84 | -1.33, 9.01 | 5.64 | 2.05, 9.23 |
| Excluding parental education      |               | 3.86 | -1.21, 8.93 | 5.32 | 1.96, 8.69 |
| Excluding IQ + parental education |               | 4.07 | -1.14, 9.29 | 5.47 | 2.03, 8.91 |
| With all including birthweight    |               | 3.66 | -1.84, 9.17 | 5.17 | 1.08, 9.25 |

N, number; SD, standard deviation; CI, confidence interval; WPPSI-R, Wechsler Preschool and Primary Scales of Intelligence-Revised; IQ, intelligence quotient; TEACH-5, Test of Everyday Attention for Children at Five; BRIEF, Behaviour Rating Inventory of Executive Function. <sup>a</sup> All adjusted analyses adjusted for maternal age, maternal IQ, average alcohol consumption in pregnancy, smoking in pregnancy, parity, maternal marital status, parental educational level, child sex, testing psychologist, and age at testing. <sup>b</sup> Adjusted for all the above-mentioned covariates except maternal IQ. <sup>c</sup> Adjusted for all the above-mentioned covariates and birthweight. <sup>d</sup> A higher BRIEF score indicates more executive function difficulties (opposite than the other outcome measures).

**Supplementary table 2.** Mean differences in intelligence, attention, and executive function between 5-year-old children born at term ( $\geq 39$ , reference group) and children born preterm. Denmark 2003-2008 ( $n=1491$ )

|                                               | Born at term $\geq 39$<br>weeks ( $n=1443$ ) | Late preterm birth 34 to $<37$<br>weeks ( $n=40$ ) |              | Moderately or very preterm<br>birth $<34$ weeks ( $n=8$ ) |               |
|-----------------------------------------------|----------------------------------------------|----------------------------------------------------|--------------|-----------------------------------------------------------|---------------|
|                                               | Mean (SD)                                    | Mean<br>difference                                 | 95% CI       | Mean<br>difference                                        | 95% CI        |
| <b>Intelligence (WPPSI-R)</b>                 |                                              |                                                    |              |                                                           |               |
| <b>Full scale IQ</b>                          |                                              |                                                    |              |                                                           |               |
| Unadjusted                                    | 105.92 (12.91)                               | -2.49                                              | -7.34, 2.35  | -9.63                                                     | -20.67, 1.41  |
| Adjusted <sup>a</sup>                         |                                              | -0.22                                              | -4.84, 4.41  | -10.27                                                    | -19.27, -1.26 |
| <b>Verbal IQ</b>                              |                                              |                                                    |              |                                                           |               |
| Unadjusted                                    | 104.93 (10.71)                               | -1.95                                              | -5.46, 1.56  | -7.33                                                     | -15.87, 1.20  |
| Adjusted                                      |                                              | -0.35                                              | -4.88, 4.17  | -7.22                                                     | -13.31, -1.14 |
| <b>Performance IQ</b>                         |                                              |                                                    |              |                                                           |               |
| Unadjusted                                    | 105.53 (16.27)                               | -2.51                                              | -9.56, 4.53  | -10.02                                                    | -20.99, 0.95  |
| Adjusted                                      |                                              | 0.03                                               | -5.73, 5.79  | -11.38                                                    | -21.60, -1.17 |
| <b>Attention (TEACH-5)</b>                    |                                              |                                                    |              |                                                           |               |
| <b>Overall attention</b>                      |                                              |                                                    |              |                                                           |               |
| Unadjusted                                    | 0.01 (1.00)                                  | -0.22                                              | -0.71, 0.27  | -0.10                                                     | -0.73, 0.52   |
| Adjusted                                      |                                              | -0.15                                              | -0.58, 0.28  | -0.22                                                     | -0.98, 0.54   |
| <b>Sustained attention</b>                    |                                              |                                                    |              |                                                           |               |
| Unadjusted                                    | 0.01 (1.01)                                  | -0.39                                              | -0.77, -0.02 | -0.10                                                     | -0.63, 0.44   |
| Adjusted                                      |                                              | -0.22                                              | -0.63, 0.20  | -0.15                                                     | -0.86, 0.55   |
| <b>Selective attention</b>                    |                                              |                                                    |              |                                                           |               |
| Unadjusted                                    | 0.00 (1.01)                                  | 0.07                                               | -0.48, 0.61  | 0.00                                                      | -0.43, 0.43   |
| Adjusted                                      |                                              | 0.04                                               | -0.44, 0.53  | -0.15                                                     | -0.59, 0.29   |
| <b>Executive function (BRIEF)<sup>b</sup></b> |                                              |                                                    |              |                                                           |               |
| <b>- Parent version</b>                       |                                              |                                                    |              |                                                           |               |
| <b>Global Executive Composite</b>             |                                              |                                                    |              |                                                           |               |
| Unadjusted                                    | 49.75 (9.93)                                 | 1.60                                               | -3.87, 7.08  | -0.23                                                     | -16.36, 15.90 |
| Adjusted                                      |                                              | 2.48                                               | -1.80, 6.75  | -0.16                                                     | -14.49, 14.17 |
| <b>Behavioural Regulation Index</b>           |                                              |                                                    |              |                                                           |               |
| Unadjusted                                    | 49.76 (9.91)                                 | -0.09                                              | -5.24, 5.07  | -0.91                                                     | -15.91, 14.08 |
| Adjusted                                      |                                              | 0.73                                               | -3.69, 5.15  | -1.72                                                     | -14.67, 11.22 |
| <b>Metacognition Index</b>                    |                                              |                                                    |              |                                                           |               |
| Unadjusted                                    | 49.77 (9.94)                                 | 2.49                                               | -3.03, 8.02  | 0.22                                                      | -15.16, 15.60 |
| Adjusted                                      |                                              | 3.32                                               | -0.94, 7.59  | 0.82                                                      | -13.07, 14.72 |
| <b>- Teacher version</b>                      |                                              |                                                    |              |                                                           |               |
| <b>Global Executive Composite</b>             |                                              |                                                    |              |                                                           |               |
| Unadjusted                                    | 49.83 (10.15)                                | 4.68                                               | -0.56, 9.93  | 5.69                                                      | 2.76, 8.61    |
| Adjusted                                      |                                              | 4.12                                               | -0.78, 9.02  | 5.30                                                      | 2.30, 8.30    |
| <b>Behavioural Regulation Index</b>           |                                              |                                                    |              |                                                           |               |
| Unadjusted                                    | 49.88 (10.06)                                | 4.57                                               | -0.24, 9.39  | 5.45                                                      | 2.21, 8.68    |
| Adjusted                                      |                                              | 3.95                                               | -0.72, 8.63  | 4.21                                                      | -0.83, 9.24   |
| <b>Metacognition Index</b>                    |                                              |                                                    |              |                                                           |               |
| Unadjusted                                    | 49.82 (10.14)                                | 4.33                                               | -1.33, 9.98  | 5.31                                                      | 0.83, 9.80    |
| Adjusted                                      |                                              | 3.86                                               | -1.36, 9.09  | 5.42                                                      | 2.20, 8.63    |

N, number; SD, standard deviation; CI, confidence interval; WPPSI-R, Wechsler Preschool and Primary Scales of

1  
2  
3  
4 Intelligence-Revised; IQ, intelligence quotient; TEACH-5, Test of Everyday Attention for Children at Five; BRIEF,  
5 Behaviour Rating Inventory of Executive Function. <sup>a</sup> All adjusted analyses adjusted for maternal age, maternal IQ,  
6 average alcohol consumption in pregnancy, smoking in pregnancy, parity, maternal marital status, parental  
7 educational level, child sex, testing psychologist, and age at testing. <sup>b</sup> A higher BRIEF score indicates more executive  
8 function difficulties (opposite than the other outcome measures).  
9  
10  
11  
12  
13  
14  
15  
16  
17  
18  
19  
20  
21  
22  
23  
24  
25  
26  
27  
28  
29  
30  
31  
32  
33  
34  
35  
36  
37  
38  
39  
40  
41  
42  
43  
44  
45  
46  
47  
48  
49  
50  
51  
52  
53  
54  
55  
56  
57  
58  
59  
60

For peer review only

**STROBE 2007 (v4) Statement—Checklist of items that should be included in reports of cohort studies**

| Section/Topic                | Item # | Recommendation                                                                                                                                                                       | Reported on page # |
|------------------------------|--------|--------------------------------------------------------------------------------------------------------------------------------------------------------------------------------------|--------------------|
| <b>Title and abstract</b>    | 1      | (a) Indicate the study’s design with a commonly used term in the title or the abstract                                                                                               | 1                  |
|                              |        | (b) Provide in the abstract an informative and balanced summary of what was done and what was found                                                                                  | 2-3                |
| <b>Introduction</b>          |        |                                                                                                                                                                                      |                    |
| Background/rationale         | 2      | Explain the scientific background and rationale for the investigation being reported                                                                                                 | 6                  |
| Objectives                   | 3      | State specific objectives, including any prespecified hypotheses                                                                                                                     | 7                  |
| <b>Methods</b>               |        |                                                                                                                                                                                      |                    |
| Study design                 | 4      | Present key elements of study design early in the paper                                                                                                                              | 7                  |
| Setting                      | 5      | Describe the setting, locations, and relevant dates, including periods of recruitment, exposure, follow-up, and data collection                                                      | 7-9                |
| Participants                 | 6      | (a) Give the eligibility criteria, and the sources and methods of selection of participants. Describe methods of follow-up                                                           | 7-9                |
|                              |        | (b) For matched studies, give matching criteria and number of exposed and unexposed                                                                                                  |                    |
| Variables                    | 7      | Clearly define all outcomes, exposures, predictors, potential confounders, and effect modifiers. Give diagnostic criteria, if applicable                                             | 8-11               |
| Data sources/<br>measurement | 8*     | For each variable of interest, give sources of data and details of methods of assessment (measurement). Describe comparability of assessment methods if there is more than one group | 8-9                |
| Bias                         | 9      | Describe any efforts to address potential sources of bias                                                                                                                            | 9-11               |
| Study size                   | 10     | Explain how the study size was arrived at                                                                                                                                            | 7                  |
| Quantitative variables       | 11     | Explain how quantitative variables were handled in the analyses. If applicable, describe which groupings were chosen and why                                                         | 8-11               |
| Statistical methods          | 12     | (a) Describe all statistical methods, including those used to control for confounding                                                                                                | 10-11              |
|                              |        | (b) Describe any methods used to examine subgroups and interactions                                                                                                                  | -                  |
|                              |        | (c) Explain how missing data were addressed                                                                                                                                          | 11                 |
|                              |        | (d) If applicable, explain how loss to follow-up was addressed                                                                                                                       | -                  |
|                              |        | (e) Describe any sensitivity analyses                                                                                                                                                | 11                 |
| <b>Results</b>               |        |                                                                                                                                                                                      |                    |



|                          |     |                                                                                                                                                                                                              |                    |
|--------------------------|-----|--------------------------------------------------------------------------------------------------------------------------------------------------------------------------------------------------------------|--------------------|
| Participants             | 13* | (a) Report numbers of individuals at each stage of study—eg numbers potentially eligible, examined for eligibility, confirmed eligible, included in the study, completing follow-up, and analysed            | 7                  |
|                          |     | (b) Give reasons for non-participation at each stage                                                                                                                                                         | 7-8                |
|                          |     | (c) Consider use of a flow diagram                                                                                                                                                                           | -                  |
| Descriptive data         | 14* | (a) Give characteristics of study participants (eg demographic, clinical, social) and information on exposures and potential confounders                                                                     | 12 + table 1       |
|                          |     | (b) Indicate number of participants with missing data for each variable of interest                                                                                                                          | Table 1            |
|                          |     | (c) Summarise follow-up time (eg, average and total amount)                                                                                                                                                  | -                  |
| Outcome data             | 15* | Report numbers of outcome events or summary measures over time                                                                                                                                               | 8-9                |
| Main results             | 16  | (a) Give unadjusted estimates and, if applicable, confounder-adjusted estimates and their precision (eg, 95% confidence interval). Make clear which confounders were adjusted for and why they were included | 12-14 + tables 2-3 |
|                          |     | (b) Report category boundaries when continuous variables were categorized                                                                                                                                    | 10-11              |
|                          |     | (c) If relevant, consider translating estimates of relative risk into absolute risk for a meaningful time period                                                                                             | -                  |
| Other analyses           | 17  | Report other analyses done—eg analyses of subgroups and interactions, and sensitivity analyses                                                                                                               | 13-14              |
| <b>Discussion</b>        |     |                                                                                                                                                                                                              |                    |
| Key results              | 18  | Summarise key results with reference to study objectives                                                                                                                                                     | 14-15              |
| <b>Limitations</b>       |     |                                                                                                                                                                                                              |                    |
| Interpretation           | 20  | Give a cautious overall interpretation of results considering objectives, limitations, multiplicity of analyses, results from similar studies, and other relevant evidence                                   | 15-17              |
| Generalisability         | 21  | Discuss the generalisability (external validity) of the study results                                                                                                                                        | 15-16              |
| <b>Other information</b> |     |                                                                                                                                                                                                              |                    |
| Funding                  | 22  | Give the source of funding and the role of the funders for the present study and, if applicable, for the original study on which the present article is based                                                | 19                 |

\*Give information separately for cases and controls in case-control studies and, if applicable, for exposed and unexposed groups in cohort and cross-sectional studies.

**Note:** An Explanation and Elaboration article discusses each checklist item and gives methodological background and published examples of transparent reporting. The STROBE checklist is best used in conjunction with this article (freely available on the Web sites of PLoS Medicine at <http://www.plosmedicine.org/>, Annals of Internal Medicine at <http://www.annals.org/>, and Epidemiology at <http://www.epidem.com/>). Information on the STROBE Initiative is available at [www.strobe-statement.org](http://www.strobe-statement.org).
