# Supplementary material for: Impact of gestational age on child intelligence, attention and executive function at age 5: a cohort study
Source: PubMed Central journal article supplement — BMJ Open. 2019 Sep 8;9(9):e028982. doi: 10.1136/bmjopen-2019-028982 (PMC6738700; doi:10.1136/bmjopen-2019-028982), 2019-09-08
Supplement: bmjopen-2019-028982supp001.pdf [file bmjopen-2019-028982supp001.pdf]

**Supplementary table 1.** Mean differences in intelligence, attention, and executive functions between 5-year-old children born at term (reference group) and children born preterm. Denmark 2003-2008 (n=1776)

|                                             | Born at term ≥37 weeks (n=1728) | Late preterm birth 34 to <37 weeks (n=40) | Moderately or very preterm birth <34 weeks (n=8) |                 |               |
|---------------------------------------------|---------------------------------|-------------------------------------------|--------------------------------------------------|-----------------|---------------|
|                                             | Mean (SD)                       | Mean difference                           | 95% CI                                           | Mean difference | 95% CI        |
| <b>Intelligence (WPPSI-R)</b>               |                                 |                                           |                                                  |                 |               |
| <b>Full scale IQ</b>                        |                                 |                                           |                                                  |                 |               |
| Unadjusted                                  | 105.64 (12.86)                  | -2.09                                     | -6.91, 2.74                                      | -9.22           | -20.25, 1.81  |
| Adjusted <sup>a</sup>                       |                                 | -0.05                                     | -4.62, 4.53                                      | -10.56          | -19.37, -1.75 |
| Excluding maternal IQ <sup>b</sup>          |                                 | -0.00                                     | -4.91, 4.91                                      | -11.23          | -21.00, -1.45 |
| Excluding parental education                |                                 | -0.64                                     | -5.16, 3.87                                      | -10.04          | -19.60, -0.48 |
| Excluding IQ + parental education           |                                 | -1.42                                     | -6.47, 3.63                                      | -10.34          | -22.19, 1.51  |
| With all including birthweight <sup>c</sup> |                                 | 2.21                                      | -2.82, 7.25                                      | -7.04           | -15.67, 1.59  |
| <b>Verbal IQ</b>                            |                                 |                                           |                                                  |                 |               |
| Unadjusted                                  | 104.81 (10.80)                  | -1.73                                     | -5.23, 1.76                                      | -7.11           | -15.64, 1.41  |
| Adjusted                                    |                                 | -0.40                                     | -4.84, 4.05                                      | -7.41           | -13.37, -1.45 |
| Excluding maternal IQ                       |                                 | -0.33                                     | -4.48, 3.83                                      | -7.86           | -14.89, -0.83 |
| Excluding parental education                |                                 | -0.98                                     | -5.40, 3.44                                      | -6.89           | -13.14, -0.64 |
| Excluding IQ + parental education           |                                 | -1.53                                     | -5.55, 2.49                                      | -7.10           | -15.24, 1.05  |
| With all including birthweight              |                                 | 0.59                                      | -4.22, 5.40                                      | -5.93           | -12.19, 0.33  |
| <b>Performance IQ</b>                       |                                 |                                           |                                                  |                 |               |
| Unadjusted                                  | 105.14 (16.22)                  | -2.00                                     | -9.02, 5.03                                      | -9.51           | -20.46, 1.45  |
| Adjusted                                    |                                 | 0.38                                      | -5.39, 6.15                                      | -11.71          | -21.89, -1.52 |
| Excluding maternal IQ                       |                                 | 0.42                                      | -6.23, 7.07                                      | -12.46          | -23.38, -1.54 |
| Excluding parental education                |                                 | -0.12                                     | -5.82, 5.59                                      | -11.28          | -22.20, -0.36 |
| Excluding IQ + parental education           |                                 | -0.93                                     | -7.85, 5.99                                      | -11.63          | -24.73, 1.47  |
| With all including birthweight              |                                 | 3.49                                      | -2.78, 9.76                                      | -6.80           | -16.60, 3.00  |
| <b>Attention (Teach-5)</b>                  |                                 |                                           |                                                  |                 |               |
| <b>Overall attention</b>                    |                                 |                                           |                                                  |                 |               |
| Unadjusted                                  | 0.01 (1.00)                     | -0.21                                     | -0.70, 0.28                                      | -0.10           | -0.72, 0.52   |
| Adjusted                                    |                                 | -0.16                                     | -0.59, 0.26                                      | -0.25           | -1.00, 0.50   |
| Excluding maternal IQ                       |                                 | -0.15                                     | -0.59, 0.30                                      | -0.28           | -1.05, 0.49   |
| Excluding parental education                |                                 | -0.21                                     | -0.63, 0.22                                      | -0.22           | -0.88, 0.44   |
| Excluding IQ + parental education           |                                 | -0.21                                     | -0.67, 0.25                                      | -0.25           | -0.90, 0.40   |
| With all including birthweight              |                                 | -0.11                                     | -0.56, 0.34                                      | -0.20           | -0.98, 0.59   |
| <b>Sustained attention</b>                  |                                 |                                           |                                                  |                 |               |
| Unadjusted                                  | 0.01 (1.00)                     | -0.39                                     | -0.76, -0.01                                     | -0.09           | -0.62, 0.44   |
| Adjusted                                    |                                 | -0.23                                     | -0.64, 0.19                                      | -0.16           | -0.83, 0.52   |
| Excluding maternal IQ                       |                                 | -0.23                                     | -0.64, 0.18                                      | -0.17           | -0.86, 0.52   |
| Excluding parental education                |                                 | -0.25                                     | -0.66, 0.16                                      | -0.13           | -0.75, 0.48   |
| Excluding IQ + parental education           |                                 | -0.27                                     | -0.68, 0.13                                      | -0.15           | -0.75, 0.46   |
| With all including birthweight              |                                 | -0.10                                     | -0.55, 0.35                                      | 0.01            | -0.72, 0.73   |
| <b>Selective attention</b>                  |                                 |                                           |                                                  |                 |               |
| Unadjusted                                  | 0.00 (1.00)                     | 0.09                                      | -0.46, 0.63                                      | 0.02            | -0.41, 0.45   |
| Adjusted                                    |                                 | 0.06                                      | -0.42, 0.53                                      | -0.19           | -0.65, 0.27   |
| Excluding maternal IQ                       |                                 | 0.07                                      | -0.41, 0.56                                      | -0.20           | -0.69, 0.29   |
| Excluding parental education                |                                 | 0.03                                      | -0.45, 0.51                                      | -0.16           | -0.56, 0.24   |
| Excluding IQ + parental education           |                                 | 0.03                                      | -0.47, 0.53                                      | -0.17           | -0.57, 0.23   |
| With all including birthweight              |                                 | 0.00                                      | -0.50, 0.50                                      | -0.31           | -0.80, 0.18   |

**Executive functions (BRIEF)<sup>d</sup>****- Parent version****Global Executive Composite**

|                                   |              |      |             |       |               |
|-----------------------------------|--------------|------|-------------|-------|---------------|
| Unadjusted                        | 49.97 (9.98) | 1.44 | -4.03, 6.90 | -0.39 | -16.52, 15.74 |
| Adjusted                          |              | 2.26 | -2.01, 6.53 | -0.20 | -14.27, 13.87 |
| Excluding maternal IQ             |              | 2.23 | -2.15, 6.62 | -0.13 | -14.00, 13.73 |
| Excluding parental education      |              | 2.67 | -1.65, 7.00 | -0.58 | -15.69, 14.54 |
| Excluding IQ + parental education |              | 2.85 | -1.77, 7.47 | -0.54 | -15.79, 14.71 |
| With all including birthweight    |              | 1.62 | -2.96, 6.20 | -1.13 | -15.16, 12.90 |

**Behavioural Regulation Index**

|                                   |              |       |             |       |               |
|-----------------------------------|--------------|-------|-------------|-------|---------------|
| Unadjusted                        | 50.01 (9.98) | -0.35 | -5.50, 4.79 | -1.18 | -16.17, 13.81 |
| Adjusted                          |              | 0.40  | -3.97, 4.76 | -1.95 | -14.87, 10.97 |
| Excluding maternal IQ             |              | 0.37  | -4.06, 4.80 | -1.84 | -14.55, 10.87 |
| Excluding parental education      |              | 0.75  | -3.68, 5.18 | -2.27 | -16.08, 11.54 |
| Excluding IQ + parental education |              | 0.93  | -3.67, 5.54 | -2.21 | -16.17, 11.75 |
| With all including birthweight    |              | -0.27 | -4.92, 4.38 | -3.03 | -15.90, 9.85  |

**Metacognition Index**

|                                   |              |      |             |      |               |
|-----------------------------------|--------------|------|-------------|------|---------------|
| Unadjusted                        | 49.95 (9.98) | 2.41 | -3.10, 7.92 | 0.13 | -15.24, 15.51 |
| Adjusted                          |              | 3.19 | -1.11, 7.49 | 0.90 | -12.60, 14.41 |
| Excluding maternal IQ             |              | 3.17 | -1.24, 7.58 | 0.94 | -12.40, 14.27 |
| Excluding parental education      |              | 3.61 | -0.73, 7.95 | 0.52 | -14.03, 15.07 |
| Excluding IQ + parental education |              | 3.77 | -0.87, 8.40 | 0.54 | -14.11, 15.20 |
| With all including birthweight    |              | 2.63 | -2.01, 7.27 | 0.15 | -13.37, 13.66 |

**- Teacher version****Global Executive Composite**

|                                   |               |      |             |      |            |
|-----------------------------------|---------------|------|-------------|------|------------|
| Unadjusted                        | 49.94 (10.03) | 4.47 | -0.77, 9.70 | 5.47 | 2.57, 8.36 |
| Adjusted                          |               | 3.99 | -0.82, 8.81 | 5.33 | 2.39, 8.27 |
| Excluding maternal IQ             |               | 4.08 | -0.85, 9.02 | 5.56 | 2.55, 8.56 |
| Excluding parental education      |               | 4.06 | -0.74, 8.87 | 5.23 | 2.23, 8.23 |
| Excluding IQ + parental education |               | 4.30 | -0.67, 9.27 | 5.40 | 2.17, 8.62 |
| With all including birthweight    |               | 4.20 | -1.02, 9.42 | 5.39 | 1.67, 9.12 |

**Behavioural Regulation Index**

|                                   |               |      |             |      |              |
|-----------------------------------|---------------|------|-------------|------|--------------|
| Unadjusted                        | 49.95 (10.01) | 4.42 | -0.38, 9.21 | 5.29 | 2.08, 8.50   |
| Adjusted                          |               | 3.79 | -0.89, 8.48 | 4.24 | -0.56, 9.03  |
| Excluding maternal IQ             |               | 3.89 | -0.91, 8.70 | 4.49 | -0.26, 9.24  |
| Excluding parental education      |               | 3.81 | -0.87, 8.49 | 4.21 | -0.62, 9.05  |
| Excluding IQ + parental education |               | 4.04 | -0.78, 8.85 | 4.38 | -0.71, 9.47  |
| With all including birthweight    |               | 4.44 | -0.63, 9.52 | 4.81 | -0.72, 10.34 |

**Metacognition Index**

|                                   |               |      |             |      |            |
|-----------------------------------|---------------|------|-------------|------|------------|
| Unadjusted                        | 49.95 (10.03) | 4.09 | -1.55, 9.73 | 5.07 | 0.61, 9.54 |
| Adjusted                          |               | 3.77 | -1.32, 8.85 | 5.46 | 1.97, 8.95 |
| Excluding maternal IQ             |               | 3.84 | -1.33, 9.01 | 5.64 | 2.05, 9.23 |
| Excluding parental education      |               | 3.86 | -1.21, 8.93 | 5.32 | 1.96, 8.69 |
| Excluding IQ + parental education |               | 4.07 | -1.14, 9.29 | 5.47 | 2.03, 8.91 |
| With all including birthweight    |               | 3.66 | -1.84, 9.17 | 5.17 | 1.08, 9.25 |

N, number; SD, standard deviation; CI, confidence interval; WPPSI-R, Wechsler Preschool and Primary Scales of Intelligence-Revised; IQ, intelligence quotient; TECh-5, Test of Everyday Attention for Children at Five; BRIEF, Behaviour Rating Inventory of Executive Function. <sup>a</sup> All adjusted analyses adjusted for maternal age, maternal IQ, average alcohol consumption in pregnancy, smoking in pregnancy, parity, maternal marital status, parental educational level, child sex, testing psychologist, and age at testing. <sup>b</sup> Adjusted for all the above-mentioned covariates except maternal IQ. <sup>c</sup> Adjusted for all the above-mentioned covariates and birthweight. <sup>d</sup> A higher BRIEF score indicates more executive function difficulties (opposite than the other outcome measures).
