# Supplementary material for: Impact of gestational age on child intelligence, attention and executive function at age 5: a cohort study
Source: PubMed Central journal article supplement — BMJ Open. 2019 Sep 8;9(9):e028982. doi: 10.1136/bmjopen-2019-028982 (PMC6738700; doi:10.1136/bmjopen-2019-028982), 2019-09-08
Supplement: bmjopen-2019-028982supp002.pdf [file bmjopen-2019-028982supp002.pdf]

**Supplementary table 2.** Mean differences in intelligence, attention, and executive function between 5-year-old children born at term ( $\geq 39$ , reference group) and children born preterm. Denmark 2003-2008 ( $n=1491$ )

|                                               | Born at term $\geq 39$<br>weeks ( $n=1443$ ) | Late preterm birth 34 to $<37$<br>weeks ( $n=40$ ) | Moderately or very preterm<br>birth $<34$ weeks ( $n=8$ ) |                    |               |
|-----------------------------------------------|----------------------------------------------|----------------------------------------------------|-----------------------------------------------------------|--------------------|---------------|
|                                               | Mean (SD)                                    | Mean<br>difference                                 | 95% CI                                                    | Mean<br>difference | 95% CI        |
| <b>Intelligence (WPPSI-R)</b>                 |                                              |                                                    |                                                           |                    |               |
| <b>Full scale IQ</b>                          |                                              |                                                    |                                                           |                    |               |
| Unadjusted                                    | 105.92 (12.91)                               | -2.49                                              | -7.34, 2.35                                               | -9.63              | -20.67, 1.41  |
| Adjusted <sup>a</sup>                         |                                              | -0.22                                              | -4.84, 4.41                                               | -10.27             | -19.27, -1.26 |
| <b>Verbal IQ</b>                              |                                              |                                                    |                                                           |                    |               |
| Unadjusted                                    | 104.93 (10.71)                               | -1.95                                              | -5.46, 1.56                                               | -7.33              | -15.87, 1.20  |
| Adjusted                                      |                                              | -0.35                                              | -4.88, 4.17                                               | -7.22              | -13.31, -1.14 |
| <b>Performance IQ</b>                         |                                              |                                                    |                                                           |                    |               |
| Unadjusted                                    | 105.53 (16.27)                               | -2.51                                              | -9.56, 4.53                                               | -10.02             | -20.99, 0.95  |
| Adjusted                                      |                                              | 0.03                                               | -5.73, 5.79                                               | -11.38             | -21.60, -1.17 |
| <b>Attention (TEAch-5)</b>                    |                                              |                                                    |                                                           |                    |               |
| <b>Overall attention</b>                      |                                              |                                                    |                                                           |                    |               |
| Unadjusted                                    | 0.01 (1.00)                                  | -0.22                                              | -0.71, 0.27                                               | -0.10              | -0.73, 0.52   |
| Adjusted                                      |                                              | -0.15                                              | -0.58, 0.28                                               | -0.22              | -0.98, 0.54   |
| <b>Sustained attention</b>                    |                                              |                                                    |                                                           |                    |               |
| Unadjusted                                    | 0.01 (1.01)                                  | -0.39                                              | -0.77, -0.02                                              | -0.10              | -0.63, 0.44   |
| Adjusted                                      |                                              | -0.22                                              | -0.63, 0.20                                               | -0.15              | -0.86, 0.55   |
| <b>Selective attention</b>                    |                                              |                                                    |                                                           |                    |               |
| Unadjusted                                    | 0.00 (1.01)                                  | 0.07                                               | -0.48, 0.61                                               | 0.00               | -0.43, 0.43   |
| Adjusted                                      |                                              | 0.04                                               | -0.44, 0.53                                               | -0.15              | -0.59, 0.29   |
| <b>Executive function (BRIEF)<sup>b</sup></b> |                                              |                                                    |                                                           |                    |               |
| <b>- Parent version</b>                       |                                              |                                                    |                                                           |                    |               |
| <b>Global Executive Composite</b>             |                                              |                                                    |                                                           |                    |               |
| Unadjusted                                    | 49.75 (9.93)                                 | 1.60                                               | -3.87, 7.08                                               | -0.23              | -16.36, 15.90 |
| Adjusted                                      |                                              | 2.48                                               | -1.80, 6.75                                               | -0.16              | -14.49, 14.17 |
| <b>Behavioural Regulation Index</b>           |                                              |                                                    |                                                           |                    |               |
| Unadjusted                                    | 49.76 (9.91)                                 | -0.09                                              | -5.24, 5.07                                               | -0.91              | -15.91, 14.08 |
| Adjusted                                      |                                              | 0.73                                               | -3.69, 5.15                                               | -1.72              | -14.67, 11.22 |
| <b>Metacognition Index</b>                    |                                              |                                                    |                                                           |                    |               |
| Unadjusted                                    | 49.77 (9.94)                                 | 2.49                                               | -3.03, 8.02                                               | 0.22               | -15.16, 15.60 |
| Adjusted                                      |                                              | 3.32                                               | -0.94, 7.59                                               | 0.82               | -13.07, 14.72 |
| <b>- Teacher version</b>                      |                                              |                                                    |                                                           |                    |               |
| <b>Global Executive Composite</b>             |                                              |                                                    |                                                           |                    |               |
| Unadjusted                                    | 49.83 (10.15)                                | 4.68                                               | -0.56, 9.93                                               | 5.69               | 2.76, 8.61    |
| Adjusted                                      |                                              | 4.12                                               | -0.78, 9.02                                               | 5.30               | 2.30, 8.30    |
| <b>Behavioural Regulation Index</b>           |                                              |                                                    |                                                           |                    |               |
| Unadjusted                                    | 49.88 (10.06)                                | 4.57                                               | -0.24, 9.39                                               | 5.45               | 2.21, 8.68    |
| Adjusted                                      |                                              | 3.95                                               | -0.72, 8.63                                               | 4.21               | -0.83, 9.24   |
| <b>Metacognition Index</b>                    |                                              |                                                    |                                                           |                    |               |
| Unadjusted                                    | 49.82 (10.14)                                | 4.33                                               | -1.33, 9.98                                               | 5.31               | 0.83, 9.80    |
| Adjusted                                      |                                              | 3.86                                               | -1.36, 9.09                                               | 5.42               | 2.20, 8.63    |

N, number; SD, standard deviation; CI, confidence interval; WPPSI-R, Wechsler Preschool and Primary Scales of

Intelligence-Revised; IQ, intelligence quotient; TEACH-5, Test of Everyday Attention for Children at Five; BRIEF, Behaviour Rating Inventory of Executive Function. <sup>a</sup> All adjusted analyses adjusted for maternal age, maternal IQ, average alcohol consumption in pregnancy, smoking in pregnancy, parity, maternal marital status, parental educational level, child sex, testing psychologist, and age at testing. <sup>b</sup> A higher BRIEF score indicates more executive function difficulties (opposite than the other outcome measures).
